# **Fossil calibrations for molecular analyses and divergence time estimation for true crabs (Decapoda: Brachyura)**

Javier Luque<sup>1,2,3,\*</sup>, Heather D. Bracken-Grissom<sup>3,4</sup>, Javier Ortega-Hernández<sup>2</sup>, and Joanna M. Wolfe<sup>2</sup>

<sup>1</sup>Museum of Zoology, Department of Zoology, University of Cambridge, Downing Street, Cambridge CB2 3EJ, UK.

<sup>2</sup>Museum of Comparative Zoology and Department of Organismic and Evolutionary Biology, Harvard University, Cambridge, MA 02138, USA.

<sup>3</sup>Department of Biological Sciences, Florida International University-Biscayne Bay Campus, North Miami, FL 33181, USA.

<sup>4</sup>Department of Invertebrate Zoology, National Museum of Natural History, Smithsonian Institution, 10th and Constitution Ave NW, Washington, DC 20560, USA.

\*Corresponding author: [jl2351@cam.ac.uk](mailto:jl2351@cam.ac.uk); [jlucose@fas.harvard.edu](mailto:jlucose@fas.harvard.edu)

## **ABSTRACT**

True crabs, or Brachyura, comprise over 7,600 known species and are among the most ecologically dominant, economically significant, and popularly recognized group of extant crustaceans. There are over 3,000 fossil brachyuran species known from mid and upper Jurassic, Cretaceous, and Cenozoic deposits across the globe, many of them preserved in exquisite detail, but the origins and early evolution of true crabs remain unresolved. This uncertainty hinders the identification of the stratigraphically earliest occurrence of major brachyuran groups in the fossil record, obscuring our understanding of their phylogenetic relationships and thus the ability to estimate divergence times to answer large scale macroevolutionary questions. Here, we present 36 vetted fossil node calibration points for molecular phylogenetic analysis of crabs (one Anomura and 35 Brachyura) and reassess the earliest occurrences of several key clades based on recent fossil discoveries or re-examination of previous studies. For each calibrated node, we provide the minimum and tip

maximum ages for the stratigraphically oldest fossil that can be reliably assigned to the group. Disentangling the anatomical disparity of fossil forms and their phylogenetic relationships is crucial to recognize the earliest branching members among brachyuran groups. This represents a critical first step understanding the evolution of carcinization and decarcinization in true crabs, the appearance of key adaptations, and the transition from sea to land and freshwater. The identification of reliable fossils for deep time calibrations, both as tips and nodes, is pivotal to ensure not only precise but more accurate divergence time estimations when reconstructing the crab tree of life.

**Keywords:** Cretaceous, crown group, evolution, freshwater, stem group, phylogeny.

## PLAIN LANGUAGE SUMMARY

We present 36 vetted fossil calibration points for molecular phylogenetic analysis of crabs (one Anomura and 35 Brachyura) and reassess the earliest occurrences of several key groups based on recent fossil discoveries or re-examination of previous studies, together with discussions for each taxon. We also provide some general observations and recommendations on fossil age selection and stratigraphic considerations. The identification of reliable fossils for deep time calibrations, both as tips and nodes, is pivotal to ensure not only precise but more accurate divergence time estimations when reconstructing phylogenetic trees.

## INTRODUCTION

The origins and evolution of true crabs, or Brachyura, have sparked the fascination of scientists and the public alike in the last decades, thanks to their astonishing anatomical diversity (disparity) and multiple convergent instances of gain/loss of the crab-like body plan (i.e., carcinization and decarcinization) ([Scholtz, 2014](#); [Luque et al., 2019b](#); [Wolfe et al., 2021](#)). With over 7,600 extant species and more than 3,000 fossil species known (see [Ng et al., 2008](#); [Schweitzer et al., 2010](#); [Luque et al., 2019b](#); [Poore and Ahyong, 2023](#), and references therein), brachyurans are one of the most speciose groups of crustaceans. The monophyly of Brachyura is widely accepted, based on morphological and molecular grounds, and they are considered reciprocal sister groups with Anomura (collectively known as false crabs and allies), both forming a clade referred to as Meiura ([Scholtz and Richter, 1995](#); [Schram and Dixon, 2004](#); [Hegna et al., 2020](#)).

The systematics and classification of brachyurans have changed considerably in the last few decades, especially concerning family-level ranks and above. New lines of evidence have become available in the form of comprehensive phylogenetic studies, new fossil discoveries, and the critical re-interpretations of previous ones using novel technologies. Molecular and morphological phylogenetics are key to better understanding the evolutionary relationships through common ancestry among and within brachyurans, allowing us to quantitatively examine previous views and hypotheses largely based on traditional alpha taxonomy. This is particularly important when considering problematic groups such as the so-called podotremes and the heterotreme eubrachyurans, now widely recognized as paraphyletic groups, as well as the relationships among primary freshwater groups (e.g., [Tan et al., 2018](#); [Wang et al., 2018](#); [Luque et al., 2019b](#); [Ma et al., 2019](#); [Tang et al., 2020](#); [Wang et al., 2020](#); [Luque et al., 2021](#); [Tsang et al., 2022](#); [Wolfe et al., 2022](#); [Zhang et al., 2022](#); [Poore and Ahyong, 2023](#)).

While molecular and morphological phylogenies provide different types of evidence for understanding evolutionary relationships among organisms, fossils offer critical anatomical, spatial, and temporal information inaccessible from extant species alone ([Luque et al., 2019b](#)). Thus, accurate calibrations in a phylogenetic framework require reliable fossils, both in terms of their systematic affinities and their chronostratigraphic occurrences, since the use of equivocal (e.g., superficially similar but unrelated) or poorly constrained temporal and stratigraphic fossils may lead to precise yet inaccurate dating (either as tips or nodes), divergence time estimates, and therefore may confound interpretations of macroevolutionary patterns and processes over time.

The fossil record of brachyurans crabs consists mainly of marine taxa, which tend to be the most abundant and often well preserved. Conversely, fossils of non-marine crabs (i.e., terrestrial, semi-terrestrial, and freshwater) are remarkably scarce and often fragmentary, largely due to the relatively dynamic and high-energy environments they inhabit, the geochemistry of the substrates, and scavenging of their corpses or even re-working and consumption of their own exuviae (e.g., [Locatelli, 2013](#); [Luque, 2017](#); [Luque et al., 2018](#)). Such biases limit the number of remains than can fossilize, often restricted to the most resilient biomineralized body parts (e.g., claw dactyli and propodi remains), with whole organisms and soft to lightly-biomineralized tissues only preserved under exceptional conditions ([Luque et al., 2019b](#); [Luque et al., 2021](#)). In turn, these biases constrain the number of fossils suitable as reliable calibration points in molecular estimations of time divergence, and consequently the available fossil data that can be used to examine the evolution of terrestrialization and the transition from marine to non-marine habitats ([Tsang et al., 2014](#); [Luque et al., 2021](#); [Watson-Zink, 2021](#); [Tsang et al., 2022](#); [Wolfe et al., 2022](#)). Understanding the early origins of marine and non-marine brachyurans by means of their fossil record requires not only new paleontological discoveries, but also a critical re-examination of previous records. This holds true for marine crab fossils as well.

Molecular biologists face limitations when selecting fossils for internal node calibrations related to evaluating specific details of such fossil occurrences, like their chronostratigraphic and lithostratigraphic context, and the reliability of their systematic placement, especially with fragmentary material ([Gandolfo et al., 2008](#); [Parham et al., 2012](#); [Wolfe et al., 2016](#)). Among crabs, convergence is ubiquitous, pervasive, and rampant, and there is a trove of extinct and extant groups that superficially may resemble each other, particularly in their dorsal carapaces. This may lead to inappropriate selection of fossils that are not in fact related, and introduce large errors and inaccuracies into the estimation of divergence dates when they are used to calibrate particular nodes and branches.

Fossils collected *in-situ* are often assigned a tentative relative age based on the chronostratigraphic age of the geological formation that contains them. However, geological formations can span tens to hundreds of meters in thickness and hundreds of thousands to millions of years in age, whereas the age of a unitary fossil sample represents a single point in time, making it difficult to constrain its age with respect to the age of the entire lithostratigraphic unit. For example, if a formation is known to be ‘Eocene’ in age, but its base and top have not been better constrained via absolute (radiometric isotope) or relative (e.g., biostratigraphy, stratigraphic position) dating, it means that it could, hypothetically, range chronostratigraphically anywhere from 56.0 to 33.9 Ma. Even if the relative age of such formation is further constrained, for example to ‘lower Eocene (Ypresian)’, the age bracket would range from 56.0 to 47.8 Ma, in which case the fossil would be assigned these as its tip maximum and minimum ages (e.g., several Italian fossil occurrences, see below). This can be circumvented when other components of the fossil assemblages shed light on the biostratigraphic ranges of other micro and/or macrofossils (e.g., the porcellanid crab in calibration 1 here), when reliable radioisotopic data are associated to the same

strata as the fossils (e.g., the pseudothelphusid freshwater crab in calibration 16 herein), or if magnetostratigraphic information is available (e.g., the parthenopid crab in calibration 23 herein).

An issue that is often oversimplified, and sometimes hard to circumvent, is the extrapolation of the age range of a formation in a specific locality to other geographically separated localities where the same formation occurs. While, in principle, the horizontality and superposition of beds in a normal sequence would allow for regional correlations, extrapolating ages is not always straightforward. This is particularly important for fossils near the lower and upper boundaries of a lithostratigraphic unit, principally due to the irregular geometry of the basins, unconformities and other erosional surfaces, eustasy, differential subsidence, diachronism, lateral facial changes, and pinching of the strata, to name some. Thus, assigning the age of a formation in one locality to a fossil found in the same formation in a different locality would be better informed by gaining some level of understanding of the local and regional geological and stratigraphic context.

Lastly, unless the ages near the top and/or the bottom of a sequence are known, an absolute age from a sample coming from a bed within the stratigraphic interval can inform about the overall age range of the formation, but does not represent the age of the formation *per se*, and therefore the age of the fossils present in the formation, unless the fossils come from or near the dated bed itself (as in the case in calibration 16 herein). Nonetheless, an approximated age bracket for a fossil occurring between two dated layers is as good of an approximation as possible, given the available data, in which case the minimum and tip maximum ages of the fossil will be informed and constrained by such absolute ages (e.g., as in the pinnotherid crab in calibration 10 herein).

Here we present a set of 36 phylogenetically vetted fossil calibration points for molecular analyses and divergence time estimations of true crabs (one anomuran outgroup, 35 brachyuran ingroups) (based on the crown group topologies inferred by [Wolfe et al., 2022](#)) (Fig. 1), and provide information on the type of material investigated, its repository and catalogue number, phylogenetic

justification, minimum and tip maximum ages, age justification, and a discussion, following best practices ([Parham et al., 2012](#)) (Table 1). For crown Meiura (Anomura + Brachyura) calibrations 1–7, we provide a soft maximum age of 191.8 Ma based on the estimated maximum age for the brachyuran fossil *Eocarcinus praecursor* [Withers, 1932](#), from the Early Jurassic (Pliensbachian) of England (Table 1). Soft maximum age of 100.9 Ma for crown Eubrachyura calibrations 8–19 and 21–36 is based on the estimated maximum age for the crown eubrachyuran fossil *Cretapsara athanata* Luque, in [Luque et al., 2021](#), from the mid-Cretaceous (uppermost Albian–lowermost Cenomanian) of Burma (Table 1). Soft maximum age of 97.0 Ma for crown Portunoidea calibration 20 is based on the estimated maximum age for the stem group portunoid fossil *Eogeryon elegius* [Ossó, 2016](#), from the mid-Cretaceous (Cenomanian) of Spain ([Luque et al., 2021](#)).

For each vetted calibration, we reassess the earliest occurrences of several key groups in light of recent fossil findings and re-examination of previous ones. In some cases, the selection of a specific fossil calibration point from the literature does not necessarily represent the oldest record that has been putatively assigned to a given family, but the oldest reliable occurrence that can be referred to the clade with optimal confidence in its morphology. Minimum and tip maximum ages were either obtained from the ages reported in the original publications, or from stratigraphically constrained absolute or relative ages from the same localities as the fossil material or localities nearby, whenever possible. Numerical ages for geological time intervals follow the International Chronostratigraphic Chart by the International Commission on Stratigraphy ([Cohen et al., 2013; updated 2023](#)).

The identification and critical examination of key fossils occurrences is crucial to disentangle the anatomical disparity of crabs and their phylogenetic relationships, to recognize the lower limits of Brachyura, the origins of carcinization and decarcinization, the transition from sea to

land and freshwater, and thus to ensure not only precise but more accurate time calibrations—both as tips and nodes—and divergence time estimates when reconstructing the crab tree of life.

## FOSSIL CALIBRATIONS

### 1. *Anomura: Galatheaidea: Porcellanidae (crown)*

**Fossil specimen.** *Vibrissalana jurassica* [Robins and Klompmaker, 2019](#). Naturhistorisches Museum Wien, Vienna, Austria. Holotype NHMW 2007z0149/0405, a somewhat complete dorsal carapace, with a broken left side (Fig. 2A).

**Phylogenetic justification.** The overall carapace shape of the holotype and sole specimen of *V. jurassica* fits well within the general diagnosis of Galatheaidea. The ovate, wide, and flattened dorsal carapace, plus the limited dorsal ornamentation and groove pattern, match previous diagnoses for Porcellanidae ([Ahyong et al., 2010](#); [Schweitzer and Feldmann, 2012](#); [Robins and Klompmaker, 2019](#)).

**Minimum age.** 145.0 Ma.

**Tip maximum age.** 152.0 Ma.

**Soft maximum age.** 191.8 Ma.

**Age justification.** This fossil was collected from the Ernstbrunn Limestone, exposed in the Ernstbrunn Quarries, Ernstbrunn, Austria. Although the age of the Ernstbrunn Limestone, based on



microfossil and ammonite biostratigraphy, has been considered to range from the middle Tithonian (Upper Jurassic) to the Berriasian (Lower Cretaceous) (e.g., [Moshammer and Schlagintweit, 1999](#); [Zeiss, 2001](#); [Schneider et al., 2013](#)), the age of the rocks bearing meirurans has been consistently treated as middle upper Tithonian (*Richterella richteri* Zone to *Micracanthoceras microcanthum* Zone, *Simplisphinctes* Subzone) (e.g., [Zeiss, 2001](#); [Feldmann and Schweitzer, 2009](#); [Schweitzer and Feldmann, 2010a](#); [Robins et al., 2013](#); [Fraaije et al., 2019](#); [Robins and Klompmaker, 2019](#)), for which a tip maximum age and a minimum age for *Vibrissalana jurassica* can be bracketed between ~152.0 and 145.0 Ma.

As described in [Wolfe et al. \(2019\)](#), a soft maximum age is obtained by phylogenetic bracketing. The oldest crown Brachyura is debatable; *Eocarcinus praecursor* [Withers, 1932](#), and *Eoprosopon klugi* [Förster, 1986](#), have both been proposed, but both lack some crown group characters. Nevertheless, stem lineage positions of these taxa ([Scholtz, 2020](#)) allow a calibration of crown group Meiura with a soft maximum from the base of the Pliensbachian, at 191.8 Ma.

**Discussion.** *Jurellana tithonia* [Schweitzer and Feldmann, 2010a](#), also from the Ernstbrunn Limestone, was previously considered the oldest porcellanid, although a recent revision of the taxon has suggested an affinity with homolodromioid brachyurans ([Robins and Klompmaker, 2019](#)). As such, *Vibrissalana jurassica* stands as the putatively oldest crown porcellanid (~152–145 Mya) and represents, to date, a better calibration point for the crown group Porcellanidae.

## 2. Brachyura: Dromiacea: Dromioidea: Dynomenidae (crown)

**Fossil specimen.** *Graptocarcinus muiri* [Stenzel, 1944](#). Bureau of Economic Geology, University of Texas at Austin. Holotype BEG00021288.000, a large and complete dorsal carapace (Fig. 2C).

209

210 ***Phylogenetic justification.*** The overall ovate carapace outline, being wider than long, with discrete  
211 but low-relief dorsal grooves, fits the diagnosis of Dynomenidae ([Schweitzer et al., 2012](#); [Van Bakel](#)  
212 [et al., 2012a](#)).

213

214 ***Minimum age.*** 100.5 Ma.

215

216 ***Tip maximum age.*** 113.0 Ma.

217

218 ***Soft maximum age.*** 191.8 Ma.

219

220 ***Age justification.*** This fossil was collected in the Taniniúl limestone, upper Lower Cretaceous  
221 (Albian), from Choy Cave in Sierra del Abra between Las Palmas and Taninil, at kilometre 550 on  
222 the railroad between Tampico and San Luis Potosí, State of San Luis Potosí, Mexico ([Stenzel,](#)  
223 [1944](#)).

224 Soft maximum age as for calibration 1.

225

226 ***Discussion.*** Six species of the genus *Graptocarcinus* [Roemer, 1887](#), ranging in age from the Lower  
227 Cretaceous (Albian) to the middle Eocene (lower Lutetian) ([Schweitzer et al., 2012](#); [Beschinn et al.,](#)  
228 [2016b](#)), are currently included within the subfamily Graptocarcininae Van Bakel, Guinot, Corral &  
229 Artal, [2012a](#). Two isolated dactyli from the Barremian “Coulés boueuses”, Serre de Bleyton, France,  
230 have been adjudicated to *Graptocarcinus* ([Hyzny and Kroh, 2015](#)). Due the fragmentary nature of  
231 the samples, we considered for calibration the earliest occurrence of fossils with more diagnostic  
232 features that would warrant inclusion within crown Dynomenidae.

Several taxonomic studies have highlighted the issues of synonymy among some species within the genus *Graptocarcinus*, for instance, *Graptocarcinus muiri*, from the Albian of San Luis Potosí, Mexico, and *Graptocarcinus texanus* [Roemer, 1887](#), from the Albian and Cenomanian of the US and Europe, with some of them concluding that *G. miuri* is a junior synonym of *G. texanus* (e.g., [Klompmaier, 2013](#); [Kocova-Veselská et al., 2014](#), and references therein), whereas other studies have maintained them as separate, valid species (e.g., [Schweitzer et al., 2012](#); [Van Bakel et al., 2012a](#); [Beschinn et al., 2016b](#), and references therein). Since the earliest confirmed occurrences of well-preserved fossils of both species are Albian in age, choosing one species over the other would impact minimally the time calibration bracket for the genus (113–100 Mya).

### 3. Brachyura: Dromiacea: Dromioidea: Dromiidae (crown)

**Fossil specimen.** *Dromiopsis gigas* [Forir, 1887](#). Mineral collections of the Université de Liège, Belgium. Holotype 4936, a large, fragmented dorsal carapace in volume, right side.

**Phylogenetic justification.** *Dromiopsis* is an extinct genus with over a dozen species known to date ([Schweitzer et al., 2010](#)). The overall circular carapace shape nearly as wide as long, the fronto-orbital configuration, and the well-developed set of dorsal grooves delimiting the dorsal carapace regions, guarantee placement within the crown Dromiidae ([Schweitzer et al., 2012](#)).

**Minimum age.** 93.9 Ma.

**Tip maximum age.** 100.5 Ma.

257 **Soft maximum age.** 191.8 Ma.

258

259 **Age justification.** The type material of *Dromiopsis gigas* comes from the Tourtias (Formation?),

260 Tournai, Belgium, which has been dated as Cenomanian based on ammonite biozonation ([Kennedy](#)

261 [et al., 2011](#)).

262

263 **Discussion.** *Costadromia hajzeri* [Feldmann and Schweitzer, 2019](#), from the Campanian (Upper

264 Cretaceous, ~83–72 Mya) Wenonah Formation in New Jersey, USA, has been recently proposed as

265 the earliest known sponge crab, and included within Dromiidae sensu lato based mostly on details of

266 the frontal margin ([Feldmann and Schweitzer, 2019](#)). While *C. hajzeri* does seem to fit well within

267 the total group Dromiidae, the presence of *Dromiopsis gigas* in mid-Cretaceous (Cenomanian,

268 ~100–93 Mya) rocks of Belgium, and its conspicuous similarity to other genera within crown

269 Dromiidae, indicate that the type material of *D. gigas* provides a better current calibration point for

270 crown Dromiidae.

271 Soft maximum age as for calibration 1.

272

273

#### 274 **4. Brachyura: Homoloida: Homoloidea: Homolidae (stem)**

275 **Fossil specimen.** *Doerflesia ornata* [Feldmann and Schweitzer, 2009](#). Naturhistorisches Museum

276 Wien (NHMW). Holotype 2007z0149/0015, a small dorsal carapace nearly complete (Fig. 2D).

277

278 **Phylogenetic justification.** The genus *Doerflesia* has several of the diagnostic features of the family

279 Homolidae, and it shows some resemblance to extant genera ([Feldmann and Schweitzer, 2009](#);

280 [Feldmann et al., 2012](#)). While a homolid affinity is most likely, its position within the crown group

cannot be warranted with the available fossil material (a dorsal carapace of the holotype and sole specimen), therefore we have chosen to treat it as a stem group member of Homolidae.

**Minimum age.** 145.0 Ma.

**Tip maximum age.** 152.0 Ma.

**Soft maximum age.** 191.8 Ma.

**Age justification.** This fossil was collected from the Ernstbrunn Limestone, exposed in the Ernstbrunn Quarries, near the village of Dörfles, Austria.

Soft maximum age as for calibration 1.

## 5. Brachyura: Raninoidea: Palaeocorystoidea: Palaeocorystidae (stem)

**Fossil specimen.** *Joeranina kerri* (Luque, Feldmann, Schweitzer, Jaramillo, and Cameron, 2012) (as *Notopocorystes*). Colombian Geological Survey (formerly INGEOMINAS), Museo Geológico José Royo y Gómez, Bogotá DC, Colombia. Holotype IGM p881128, a nearly complete dorsal carapace (Luque et al., 2012, pp. 411–413, fig. 4A, B.; Luque et al., 2017, p. 20, fig. 8B) (Fig. 2E).

**Phylogenetic justification.** Recent phylogenetic studies have shown consistently that crabs of the extinct superfamily Palaeocorystoidea occupy an intermediate place between the crab-like Necrocarinoidea and the frog-like Raninoidea (Karasawa et al., 2014; Luque, 2015a; Schweitzer et

[al., 2016a](#); [Luque et al., 2019b](#)). As such, Palaeocorystoidea as a whole is recovered as part of the stem group of Raninoidea, the latter of which includes all of the extant genera of frog crabs.

**Minimum age.** 113.0 Ma.

**Tip maximum age.** 118.0 Ma.

**Soft maximum age.** 191.8 Ma.

**Age justification.** The holotype of *Joeranina kerri* was discovered *in-situ* by one of us (J.L.) in grey shales of the upper portion of the Lower Cretaceous Paja Formation, exposed along the road between the towns of San Gil and Curití, in the Department of Santander, Colombia. The occurrence of the gastropod *Turritella (Haustator) columbiana* [Jaworski, 1938](#), and the ammonite *Acanthohoplites eleganteante* [Etayo-Serna, 1979](#), stratigraphically below the horizon yielding the holotype of *J. kerri*, indicate an upper Aptian age in Colombia (see in [Luque et al., 2012](#); [Luque, 2014](#)).

Soft maximum age as for calibration 1.

**Discussion.** Frog crabs and allies, together constituting the Section Raninoida ([Ahyong et al., 2007](#)), are among the most anatomically disparate brachyuran groups ([Schweitzer et al., 2012](#); [Van Bakel et al., 2012b](#); [Karasawa et al., 2014](#); [Hartzell et al., 2022](#)). Recent phylogenetic studies have shown that early-branching forms, referred to as the crab-like raninoidans (e.g., Orithopsidae, Paranecrocarcinidae, Necrocarcinidae, Cenomanocarcinidae) are sister groups to a clade formed by mostly decarcinized, frog-like raninoidan families such as the extinct Palaeocorystidae and the

extant Raninidae and allied relatives ([Luque, 2015a](#); [Schweitzer et al., 2016a](#); [Luque et al., 2019b](#)). As such, the most recent common ancestor of Palaeocorystidae + Raninidae must be as old or older than the oldest fossils known within Palaeocorystidae, which correspond to *Joeranina kerri* from the upper Aptian (Lower Cretaceous, 118–113 Mya) of Colombia, South America, as indicated above.

## 6. Brachyura: Raninoida: Raninoidea: Lyreididae (stem)

**Fossil specimen.** *Marylyreidus punctatus* ([Rathbun, 1935](#), as *Notopocorystes*). University of Texas. Holotype Coll. No. 210, a nearly complete dorsal carapace in volume. A non-type specimen is illustrated in Fig. 2E.

**Phylogenetic justification.** The type material of *Marylyreidus punctatus*, together with additional specimens known from different localities and preserving dorsal, ventral, cuticular, and pleonal details, strongly show a crown Raninoidea affinity, with a sternal configuration suggesting a close proximity to lyreidids ([Van Bakel et al., 2012b](#); [Karasawa et al., 2014](#); [Frantescu et al., 2016](#); [Schweitzer et al., 2018](#)). This is consistent with the phylogenetic position of *Marylyreidus*, recovered in a parsimony analysis as sister to *Bournelyreidus* van Bakel, Guinot, Artal, Fraaije, and Jagt, [2012b](#), both forming an early diverging stem group sister to the remainder of the lyreidid-like frog crabs ([Karasawa et al., 2014](#)).

**Minimum age.** 100.5 Ma.

**Tip maximum age.** 104.0 Ma.

352 *Soft maximum age.* 191.8 Ma.

353

354 *Age justification.* The type specimen of *Marylyreidus punctatus* was discovered in rocks of the  
 355 Lower Cretaceous (Albian), indicated by [Rathbun \(1935\)](#) as belonging to the ‘Denton Clay, lower  
 356 Comanche Series, Washita Formation’, cropping out in Grayson County, two miles north of  
 357 Denison, Texas, USA ([Rathbun, 1935](#)). Currently, the Washita ‘Formation’ in Texas is considered at  
 358 the Group level, and constituted at its thickest part by seven formations, in ascending order:  
 359 Kiamichi, Duck Creek, Fort Worth, Denton, Weno, Paw Paw, and Main Street formations ([Scott et](#)  
 360 [al., 2002](#); [Scott et al., 2016](#)). The entire Washita Group from base to top is thought to have been  
 361 deposited between 104–94.4 Ma, with its lower boundary in the lowermost upper Albian, and with  
 362 the upper Albian–lower Cenomanian boundary (100.5 Ma) represented in the uppermost Main Street  
 363 Limestone ([Scott et al., 2000](#); [Scott et al., 2002](#)). Denton Formation has been dated as upper Albian,  
 364 based on the occurrence of ammonites from the *Mortoniceras (Subschloenbachia) rostratum* Zone  
 365 ([Kennedy et al., 2005](#)). Additional specimens assigned to *M. punctatus* have been recovered from  
 366 several localities and stratigraphic intervals in Texas, including the slightly younger but also upper  
 367 Albian Paw Paw Formation ([Frantescu et al., 2016](#)). As such, relaxing the lowermost and uppermost  
 368 potential occurrences of *M. punctatus* within the Washita Group, its tip maximum and minimum  
 369 ages can be bracketed within 104.0–100.5 Ma.

370 Soft maximum age as for calibration 1.

371

372 *Discussion.* [Wolfe et al. \(2022\)](#) recovered a monophyletic Lyreididae nested within a paraphyletic  
 373 ‘Raninidae’. As such, despite *Marylyreidus* being part of the stem group to Lyreididae (or  
 374 Lyreininae, if confirmed to be a subfamily within Raninidae), it belongs to the crown Raninoidea.  
 375 Besides *M. punctatus*, only a couple other raninoideans are currently known from upper Albian



rocks worldwide, both initially assigned to the genus *Hemioon* [Bell, 1863](#), traditionally considered a Lyreididae. These are ‘*H. cunningtoni*’ [Bell, 1863](#), the type species of the genus and known from the upper Albian of England, and ‘*Hemioon yanini*’ [Ilyin and Alekseev, 1998](#), known from the upper Albian of Crimea. However, both records are problematic. Firstly, ‘*Hemioon*’ has been a problematic taxon due to the few specimens known and their poor preservation, resulting in some authors considering it a valid taxon, whereas others have synonymized it with *Raninella* A. [Milne-Edwards, 1862a](#) (see discussions in [Bishop and Williams, 2000](#); [Van Bakel et al., 2012b](#); [Karasawa et al., 2014](#); [Schweitzer et al., 2018](#) and references therein). Secondly, *Raninella* ‘*cunningtoni*’ might be a juvenile of *Raninella elongata* [Milne-Edwards, 1862b](#) (see [Bishop and Williams, 2000](#); [Van Bakel et al., 2012b](#); [Karasawa et al., 2014](#) and references therein). Thirdly, *Raninella* is currently considered a member of the subfamily Ranininae within the Raninidae, in which case this family would also have an upper Albian record. Unfortunately, besides the conflicting views on their systematic affinities, the exact age of ‘*H. cunningtoni*’ needs further revision (B. van Bakel, pers. comm. to J.L., February 2023).

Regarding ‘*Hemioon yanini*’, its age is better constrained the species above discussed, being referable to the upper Albian based on its occurrence in the *Mortoniceras infiatum* zone ([Ilyin and Alekseev, 1998](#); [Ilyin, 2005](#)), but its systematic placement is equally convoluted. [Van Bakel et al. \(2012b\)](#) included this species within *Raninella*, whereas [Karasawa et al. \(2014\)](#) included it within the genus *Macroacaena* [Tucker, 1998](#), under the lyreidid subfamily Macroacaeninae Karasawa, Schweitzer, Feldmann, and Luque, [2014](#) ([Schweitzer et al., 2018](#)). Regardless the generic and specific affinities of ‘*H. cunningtoni*’ and ‘*H. yanini*’, the presence of disparate raninidoid forms in the late Albian of USA, UK, and Crimea, indicate that the most recent common ancestor of Raninodiea and all of its descendants must have originated before the late Albian.

## 7. Brachyura: Cyclodorippoidea: Cyclodorippoidea: Cymonomidae (crown)

**Fossil specimen.** *Cymonomus primitivus* [Müller and Collins, 1991](#). Természettudományi Múzeum, Föld-és oslénnyar, VIII Muzeum krt. 14-16, H-1088 Budapest, Hungary. Holotype EK-10.1 [M.91-135], a partial dorsal carapace ([Müller and Collins, 1991](#), p. 61, 63–64, pl. 3, fig. 6) (Fig. 2G).

**Phylogenetic justification.** The Hungarian specimen can be referred to crown Cyclodorippoidea, and assignable to Cymonomidae based on diagnostic characteristics of the subquadrate dorsal carapace, the narrow fronto-orbital margin, and the configuration of the dorsal grooves and regions, which fit well within the diagnosis of crown Cymonomidae ([Müller and Collins, 1991](#); [Tavares, 1993](#); [Ahyong, 2019](#)).

**Minimum age.** 33.9 Ma.

**Tip maximum age.** 37.71 Ma.

**Soft maximum age.** 191.8 Ma.

**Age justification.** *Cymonomus primitivus* was collected from 4–5 m thick coral-bearing limestones of Facies 4 of the Upper Eocene (Priabonian) Szépvölgy Limestone Formation, cropping out at the Ruprecht quarry, Budapest, Hungary, with the coral fauna indicating a Priabonian age ([Müller and Collins, 1991](#)).

Soft maximum age as for calibration 1.

**Discussion.** Besides *Cyonomus primitivus*, other presumed cyonomids are known from the Eocene, e.g., *Spathanomus felicianensis* [De Angeli, 2016](#), and *Caporiondulus bericus* [De Angeli, 2016](#), from the Priabonian of the Orgiano quarry, Monti Berici, Italy, and *Eonomus californianus* Nyborg, Garassino, and Slak, [2017](#), from the early to middle Eocene LLajas Formation, Simi Valley, California, USA. We selected *C. primitivus* as our vetted calibration point for crown Cyonomidae (~37–33 Ma), since *Cyonomus* is an extant genus, whereas *Spathanomus*, *Caporiondulus*, and *Eonomus* are all extinct genera, and their family-level affinities are considered by some authors as uncertain (e.g., [Schweitzer et al., 2017](#)).

## 8. Brachyura: Eubrachyura: Potamoidea: Potamidae (crown)

**Fossil specimen.** *Alontecarcinus buratoi* [De Angeli and Caporiondo, 2019](#). Museo di Storia Naturale di Verona. Holotype IGVR 19.38, a complete dorsal carapace (Fig. 3B).

**Phylogenetic justification.** The type material of *Alontecarcinus buratoi* shows remarkable similarities with the dorsal carapaces of extant potamid crabs, including their oval outline and wide carapace, the well-developed cervical and gastro-cardiac grooves, a front that is entire and directed downwards, and the convex lateral margins that are smooth and bear a single epibranchial tooth ([De Angeli and Caporiondo, 2019](#)).

**Minimum age.** 37.71 Ma.

**Tip maximum age.** 41.2 Ma.

**Soft maximum age.** 100.9 Ma.

**Age justification.** This fossil was collected from middle Eocene limestones of the Alonte quarry in Berici Mounts, Vicenza, Northern Italy ([De Angeli and Caporiondo, 2019](#)). The stratigraphic position of the Alonte quarry Limestones, overlying rocks of middle Eocene age, and underlying rocks of Priabonian age, together with associations of gastropods and bivalves (e.g., *Ampullina*, *Cerithium*, *Campanile*, *Natica*, *Corbis*, *Glycimeris*), echinoids (e.g., *Leiopedina*, *Sismondia*, *Echinolampas*, *Schizaster*, *Cidaris*), and calcareous nannofossils, indicate a Bartonian age for the Alonte quarry Limestones (41.2–37.71 Ma) ([Beccaro, 2003](#); [De Angeli and Alberti, 2016](#); [De Angeli and Caporiondo, 2019](#)).

As this node is within Eubrachyura, a soft maximum age is based on *Cretapsara athanata* Luque in [Luque et al., 2021](#), which is the oldest crown group Eubrachyura. The position of *C. athanata* relative to modern eubrachyuran families is not clear, but its membership within the crown group, based on morphological phylogenetic analysis ([Luque et al., 2021](#)), indicates that the common ancestor of typical eubrachyuran forms must be older than the earliest Late Cretaceous. The fossil was found in Burmese amber, for which the exact age estimates can vary, depending of the source. The limited radioisotopic U-Pb information available for Kachin burmite indicates an age of  $98.8 \pm 0.6$  Ma ([Shi et al., 2012](#)), which would suggest a bracketed tip maximum age and minimum age for *C. athanata* between 99.4 Ma and 98.2 Ma. As radiometric estimates pertain primarily to the sediments and not necessarily the amber itself (see discussion in [Luque et al., 2021](#)). Therefore, we calibrate a soft maximum close to the Albian–Cenomanian boundary  $100.5 \text{ Ma} \pm 0.4 \text{ Myr} = 100.9 \text{ Ma}$ .

## 9. Brachyura: Eubrachyura: Ocypodoidea: Ocypodidae (crown)

**Fossil specimens.** *Afruca miocenica* ([Artal, 2008](#), as *Uca*). Museo Geológico del Seminario de Barcelona (MGSB), Catalonia, Spain. Holotype MGSB 68653, a complete and well-preserved dorsal carapace (Fig. 3C), and paratypes 68654a to 68654e, including well-preserved dorsal and ventral males and females with pleon, maxillipeds, pereopods, and the male major cheliped.

**Phylogenetic justification.** The type material of *Afruca miocenica* can be confidently assigned to the genus *Afruca* based on the diagnostic enlarged and flattened dactyli and pollices of the male major cheliped, and it is closest to the extant *Afruca tangeri* ([Eydoux, 1835](#)), which is the only recognized species of fiddler crabs living today in the Iberic Peninsula and north Atlantic Africa. While *A. miocenica* might indeed represent its own species, its overall similarities with *A. tangeri* have invited the question of whether they are synonymous, with the former representing ontogenetic variations similar to those seen in younger individuals of the later ([de Gibert et al., 2013](#)). In either scenario, the close proximity between *A. miocenica* and *A. tangerii* is remarkable, and the phylogenetic assignment of the fossils from Catalonia to the extant genus *Afruca*—and thus to the crown Ocypodidae—are confirmed.

**Minimum age.** 13.82 Ma.

**Tip maximum age.** 15.97 Ma.

**Soft maximum age.** 100.9 Ma.

495 **Age justification.** The fossil material of *Afruca miocenica* was collected *in-situ* in terrigenous  
 496 yellow claystones from a lower Middle Miocene (Langhian, 15.97–13.82 Ma) locality of the Rubí  
 497 (Vallés), Province of Barcelona, Catalonia, NE Iberian Peninsula ([Artal, 2008](#)). These deposits are  
 498 part of the Vallès-Penedès basin, and represent marine to coastal mangrove facies deposited during  
 499 the maximum transgression of the Langhian in the area ([Batllori and García, 1997](#); [de Gibert and](#)  
 500 [Robles, 2005](#); [Artal, 2008](#); [Garassino et al., 2009](#)), overlying continental Burdigalian facies  
 501 ([Casanovas-Vilar et al., 2011](#)), and underlying continental Serravalian facies ([Batllori and García,](#)  
 502 [1997](#); [de Gibert and Robles, 2005](#); [Casanovas-Vilar et al., 2016](#)).

503         Soft maximum age as for calibration 8.

505 **Discussion.** The fossil record of fiddler crabs is sparse and fragmentary, with only half a dozen  
 506 species recognized from fossilized carapaces (e.g., [Artal, 2008](#); [Domínguez Alonso, 2008](#); [de Gibert](#)  
 507 [et al., 2013](#); [Luque et al., 2017](#); [Luque et al., 2018](#); [Lima et al., 2020](#)). Aside *Afruca miocenica*, the  
 508 only other Miocene fiddler crab known is *Uca maracoani* ([Latreille, 1802](#)) from Brazil ([Brito, 1972](#);  
 509 [Luque et al., 2017](#); [Luque et al., 2018](#); [Lima et al., 2020](#)). The fossil material of *U. maracoani* was  
 510 collected in rocks of the Pirabas Formation, in the village of Baunilha Grande, Baía de Quatipuru,  
 511 Pará State, Brazil ([Brito, 1972](#)), and subsequent material from the area has been reported recently  
 512 ([Lima et al., 2020](#)). However, the exact age and stratigraphic provenance of these specimens is  
 513 unclear. Overall, palynological, lithological, petrographic, and geochemical data indicate that the  
 514 Pirabas Formation as a whole is constituted by two distinct depositional groups: the oldest and  
 515 lowermost one, of uppermost Lower Miocene age, deposited in a shallow marine environment, and  
 516 the youngest and uppermost one, of upper Middle Miocene to Upper Miocene, deposited in a coastal  
 517 environment near mangroves (e.g., [Aguilera et al., 2022](#); [Gomes et al., 2023](#)). In localities such as  
 518 Capanema, where the lowermost depositional unit outcrops, absolute Sr/Sr dating obtained from

pectinid bivalve shells have yielded ages of 17.3–16.0 Ma, suggesting an uppermost Lower Miocene (upper Burdigalian) age ([Martinez et al., 2017](#); [Gomes et al., 2023](#)). In localities such as Praia do Atalaia and Praia do Maçarico, where the uppermost depositional unit outcrops, palynomorphs of the T16 biozone ([Jaramillo et al., 2011](#)) indicate an age of 12.7 to 7.1 Ma, suggesting an uppermost Middle Miocene to Upper Miocene age (mid Serravalian to lowermost lower Messinian) ([Gomes et al., 2023](#)). The fiddler crab-bearing facies of the Pirabas Formation at the ‘Furo de Baunilha Grande’ locality correspond to the latter, younger unit, with a most probable age of uppermost Middle Miocene to Upper Miocene, roughly corresponding to the Serravalian–Tortonian (13.82–7.246 Ma) ([Gomes et al., 2023](#)). Moreover, these fiddler crab-bearing nodules are not *in-situ*, but found loose on the Baunilha stream floor ([Lima et al., 2020](#); Orangel Aguilera, pers. comm. to J.L., February 2023), and although previous works have presumably recovered palynological samples associated to these nodules that would suggest a uppermost Lower Miocene rock age (e.g., [Antonioli et al., 2015](#)), more recent and comprehensive biostratigraphic and paleoenvironmental studies across localities have confirmed the uppermost Middle Miocene to Upper Miocene age of the Baunilha Grande rocks ([Gomes et al., 2023](#)). As such, we opt to use the apparently older and *in-situ* occurrence of *Afruca miocenica* (Langhian, 15.97–13.82 Ma) as our calibration point for Ocypodidae.

Aside from the two fiddler crab species above mentioned, the only other Ocypodidae with Miocene fossils known to date is *Ocypode vericoncava* [Casadío et al., 2005](#), a single damaged dorsal carapace from the upper Miocene (Tortonian? 11.63–7.246 Ma) of Argentina. Despite the poor preservation of the holotype and sole specimen, the overall shape and fronto-orbital configuration match those of *Ocypode*. Thus, this occurrence from Argentina, together with those of *Uca* from Brazil and *Afruca* in Catalonia, indicate that Ocypodidae was already widespread by the mid-Miocene, and that the most recent common ancestor of Ocypodidae and its divergence from

other thoracotremes must have occurred in the pre-Neogene, most likely in the Paleogene or even the Cretaceous ([Wolfe et al., 2022](#)).

## 10. Brachyura: Eubrachyura: Pinnotheroidea: Pinnotheridae (crown)

**Fossil specimen.** *Pinnixa* sp. Invertebrate Paleontology collections, Florida Museum of Natural History. Specimen UF 115397, a complete dorsal carapace ([Luque et al., 2017](#), fig. 12Q) (Fig. 3D).

**Phylogenetic justification.** Based on the overall carapace shape and dorsal patterns, this fossil specimen can be assigned with confidence to the genus *Pinnixa*. Recent molecular studies, however, have shown that *Pinnixa* species may not form a monophyletic genus, but be distributed among three Pinnotheridae subfamilies (e.g., [Palacios Theil et al., 2016](#)). Despite this, they all can be assigned to the crown-group Pinnotheridae, justifying the inclusion of the fossil *Pinnixa* from the lower Miocene of Panama in the crown group.

**Minimum age.** 18.7 Ma.

**Tip maximum age.** 21.68 Ma.

**Soft maximum age.** 100.9 Ma.

**Age justification.** The specimen was collected *in-situ* by one of us (J.L.) in marine grey mudstones from the middle part of the upper member of the Culebra Formation in the Panama Canal Zone, Lirio section, Culebra Cut (formerly known as Gaillard Cut). The marine rocks of the Culebra



Formation are lower Miocene (uppermost Aquitanian–lower Burdigalian), and not Oligocene as assumed by [Rathbun, 1918 \[1919\]](#) and repeated as such by subsequent authors (see notes in [Luque et al., 2017](#)). At its base, the marine Culebra Formation overlies in sharp unconformity the terrestrial upper Oligocene-lower Miocene rocks of the Las Cascadas Formation, and its top, it underlies conformably the coarser terrestrial rocks of the upper Lower to Middle Miocene Cucaracha Formation ([Montes et al., 2012](#); [Buchs et al., 2019](#); [LeBlanc, 2021](#)). [Kirby et al. \(2008\)](#) reported Sr isotope dating ages for different parts of the formation, including four ages from *Acropora* corals and pectinids in the middle member of the Culebra Formation (Emperador Limestone), ranging between  $21.24 \pm 0.44$  and  $20.62 \pm 0.58$  Ma, and two ages of from a pectinid and an ostreid ( $19.83 \pm 0.39$  and  $19.12 \pm 0.42$  Ma, respectively), from the lowermost portion of the Cucaracha Formation, above the top of the upper member of the Culebra Formation ([Kirby et al., 2008](#), fig. 6, table 2). [Montes et al. \(2012\)](#) reported a U/Pb age of  $19.3 \pm 0.4$  Ma from magmatic zircons in an ash tuff from the lower half of the upper member of the Culebra Formation, and [MacFadden et al. \(2014\)](#) reported U/Pb and Ar/Ar ages of  $18.81 \pm 0.3$  and  $18.96 \pm 0.9$ , respectively, from detrital zircons in an ash tuff from the overlying Cucaracha Formation. As such, based on the currently available absolute ages available, the age of the crab-bearing beds in the middle part of the upper member of the Culebra Formation—and thus that of *Pinnixa* sp.—can be bracketed with confidence between 21.68 and 18.7 Ma, most likely around 20–19 Ma (see [Farris et al., 2017](#)), in the lowermost Burdigalian, near the Aquitanian–Burdigalian boundary.

Soft maximum age as for calibration 8.

**Discussion.** The fossil record of pinnotherids is among the most controversial among eubrachyurans, in part because of their overall small sizes, their largely fragmentary fossil record, and the overall carapace outline similarities of some fossils to some species of other eubrachyuran

(e.g., some hexapodids and aphanodactylids). This obscures the systematic affinities of several fossils, and thus casts doubts on their usefulness for node calibrations of crown Pinnotheridae.

The extinct genus *Viapinnixa* [Schweitzer and Feldmann, 2001](#), comprises four species that range in age from the lower Paleocene to the lower Eocene (e.g., [Philippi, 1887](#); [Vega et al., 2001](#); [Vega et al., 2007](#); [Vega et al., 2008](#); [Armstrong et al., 2009](#)), which are remarkably similar to species within Hexapodidae. As such, the genus cannot be assigned with certainty to the pinnotheroids ([Luque et al., 2017](#)), and even less so to the crown group Pinnotheridae. Other fossil currently placed in the family Pinnotherinae include the spectacularly preserved extinct genus *Pharkidodes* Feldmann, Schweitzer, Casadío & Griffin, [Feldmann et al., 2011b](#), from the middle Miocene of Tierra del Fuego, Argentina, which unfortunately cannot be placed within the crown group with certainty.

Three fossil species have been dubiously assigned to *Pinnotheres*, i.e., *P.?* *araucana* [Philippi, 1887](#), from the ‘Tertiary’ of Chile, *P.?* *elatus* [Milne-Edwards, 1873](#), from the upper Miocene of France, and *P.?* *promaucanus* [Philippi, 1887](#), from the Miocene of Chile ([Schweitzer et al., 2010](#)). Over half a dozen species have been previously assigned to *Pinnixa*. ‘*Pinnixa*’ *eocenica* [Rathbun, 1926](#), from the Eocene of Washington, USA, is a junior homonym of *Pinnixa eocenica* [Woods, 1922](#), and it is currently recognized as a hexapodid: *Palaeopinnixa rathbunae* Schweitzer, Feldmann, Tucker & Berglund, [2000](#).

*Pinnixa navidadensis* Feldmann, Schweitzer and Encinas, [2005](#), from the middle Miocene of Chile ([Feldmann et al., 2010](#); [Jagt et al., 2015](#); and *Pinnixa* sp., from the middle Pleistocene of Florida ([Agnew, 2001](#); [Portell and Agnew, 2004](#)), can be assigned to *Pinnixa*, but they are younger than *Pinnixa* sp. from the lower Miocene Culebra Formation in Panama. *Pinnixa aequipunctata* [Morris and Collins, 1991](#), and *P. omega* [Morris and Collins, 1991](#), come from the Pliocene Upper

Miri Formation, Brunei. *Pinnixa microgranulosa* [Collins et al., 2003](#), from the Miocene Sandakan Formation, Sarawak, may also belong to the hexapodid genus *Palaeopinnixa*.

As such, given the reliable systematic placement and the constrained stratigraphic age of *Pinnixa* sp. from the lower Miocene Culebra Formation in the Panama Canal Zone ([Luque et al., 2017](#)), this is to date the most reliable calibration datum for the crown group Pinnotheridae, while the most recent common ancestor of all extant pinnotherids must have originated in the pre-Neogene, most likely the Paleogene or Late Cretaceous (see [Wolfe et al., 2022](#)).

# **11.Brachyura: Eubrachyura: Grapsoidea: Percnidae (crown)**

**Fossil specimen.** *Percnon paleogenicus* [De Angeli, 2023](#). Museo Civico "D. Dal Lago" di Valdagno (MCV), Vicenza, northern Italy. Holotype MCV.23/738-22.341, a complete dorsal carapace, part and counterpart (Fig. 3E).

**Phylogenetic justification.** Seven extant species in the genus *Percnon* constitute the monophyletic family Percnidae [Stevcic, 2005](#), which is nested within Grapsoidea (e.g., [Schubart and Cuesta, 2010](#); [Wolfe et al., 2022](#)). The fossil species *P. paleogenicus* has a carapace shape and an orbitofrontal configuration that are typical of Percnidae close to *Percnon*, and thus is a reliable calibration point for the family.

**Minimum age.** 33.9 Ma.

**Tip maximum age.** 37.71 Ma.

637 **Soft maximum age.** 100.9 Ma.

638

639 **Age justification.** The holotype of *P. paleogenicus* was collected from calcarenites and calcareous  
640 algae levels of the Collina di San Feliciano (Orgiano, Vicenza), which has been dated as upper  
641 Eocene (Priabonian, ~37.71–33.9 Mya) based on nannofossils ([Beccaro, 2003](#), in [De Angeli and](#)  
642 [Garassino, 2021b, a](#)) (Fig. 1).

643

644 **Discussion.** Until recently, the only and thus oldest fossil assignable to Percnidae was *Percnon*  
645 *santurbanensis* [Ceccon and De Angeli, 2019](#), represented by a well-preserved dorsal carapace  
646 collected from the lower Oligocene (Rupelian, ~33.90–27.82 Ma) of the Berici eastern Lessini  
647 mountains in Montecchio Maggiore, Vicenza, northern Italy ([Ceccon and De Angeli, 2019](#)) (Fig.  
648 3E). We used this fossil recently in [Wolfe et al., 2022](#) as the calibration point for Percnidae, since *P.*  
649 *paleogenicus* was published posterior to the completion of the phylogenetic study and became  
650 available to us at a later stage. What is clear is that there is more than one fossil species referable to  
651 Percnidae and *Percnon* per se, and that the crown group Percnidae must have a pre-Priabonian  
652 origin, probably into the Paleocene or uppermost Cretaceous.

653

654

## 655 **12. Brachyura: Eubrachyura: Grapsoidea: Grapsidae (crown)**

656 **Fossil specimen.** *Pachygrapsus hungaricus* [Müller, 1974](#). Hungarian Natural History Museum,  
657 department of Earth Sciences and Palaeontology. Holotype HNHM 2004.163.1, a nearly complete  
658 dorsal carapace (Fig. 3G).

659

660 **Phylogenetic justification.** Morphological and molecular phylomitogenomic studies indicate that  
 661 *Pachygrapsus* is phylogenetically well nested within crown Grapsidae, close to *Grapsus* (e.g.,  
 662 [Karasawa and Kato, 2001](#); [Chen et al., 2019](#); [Lü et al., 2022](#); [Tsang et al., 2022](#); [Wolfe et al., 2022](#);  
 663 [Zhang et al., 2022](#)).

664  
 665 **Minimum age.** 12.6 Ma.

666  
 667 **Tip maximum age.** 13.82 Ma.

668  
 669 **Soft maximum age.** 100.9 Ma.

670  
 671 **Age justification.** The type material of *Pachygrapsus hungaricus* was collected from a patch reef  
 672 with *Porites* of the Leitha Limestone Formation, exposed at Téteny-plateau, western part of  
 673 the Budapest area, Hungary, dated as Middle Miocene (late Badenian, Decapod Zone 4 sensu  
 674 Müller, 1984) ([Hyzny, 2016](#); [Hyzny and Dulai, 2021](#)). Several tens of additional specimens referred  
 675 to *P. hungaricus* have also been reported from coeval rocks in several localities in the Budapest area  
 676 (Gyakorló út, Örs vezér tere, and Rákosszentimre), as well as in its vicinity (i.e., Bátorbány and Diósd) in  
 677 Hungary, and from coeval strata in Austria and Poland ([Müller, 1984, 1996](#); [Hyzny, 2016](#); [Hyzny](#)  
 678 [and Dulai, 2021](#)). Other conspecific occurrences are known from slightly older strata as well  
 679 (Decapod Zone 3 sensu Müller, 1984). Thus, *P. hungaricus* has been reliably documented from the  
 680 entire span of the upper Badenian (13.82–12.6 Ma) ([Kovács et al., 2018](#); M. Hyzny, pers. comm. to  
 681 J.L., February 2023) (Figs 1, 3G).

682 The age of the lower and upper boundaries of the Paratethyan Badenian stage/age have been  
 683 a matter of ongoing discussion. While some authors have considered that the age of the Badenian

lower boundary is positioned at the top of chron C5Cn.2n (16.303 Ma), roughly equivalent to the uppermost part of the global Lower Miocene Burdigalian stage/age (e.g., [Piller et al., 2007](#); [Hohenegger et al., 2014](#); [Wagreich et al., 2014](#)), others have considered it to be closer to the base of the global Langhian stage/age (15.97 Ma) ([Krijgsman and Piller, 2012](#); [Reichenbacher et al., 2013](#); [Gozhyk et al., 2015](#); [Kováč et al., 2018](#)). Similarly, for several authors, the age of the Badenian upper boundary is positioned at the top of polarity chron C5Ar.2n (12.829), roughly equivalent to the middle part of the global Middle Miocene Serravallian stage/age boundary (e.g. [Hohenegger et al., 2014](#); [Wagreich et al., 2014](#)), whereas for others, the Badenian/Sarmatian boundary is slightly younger (12.7–12.6 Ma) (e.g., [Piller et al., 2007](#); [Krijgsman and Piller, 2012](#); [Kováč et al., 2018](#), see also [Hyzny and Dulai, 2021](#) and references therein). This reflects the issues of interpreting minimum and tip maximum ages for taxa based on the literature alone, since the lithostratigraphic boundary ages in different localities might vary in relation with eustatic sea-level changes and local subsidence, and rarely a crab fossil occurrence is tied to absolute dating.

Since the goal of our calibration is not to resolve the exact stratigraphic age of a given occurrence but to provide a confidence range that brackets the minimum and tip maximum ages, we opt to consider the minimum age of *P. hungaricus* as 12.6 Ma, and the tip maximum age as 13.82 Ma, which roughly delimit the bottom and top of the Late Badenian ([Kováč et al., 2018](#)).

Soft maximum age as for calibration 8.

**Discussion.** Fossils of grapsid crabs are rare, in part due to the relatively dynamic and high-energy environments they inhabit. Among grapsids, the genera *Goniopsis* and *Leptograpsus* (monotypic) have no confirmed fossil record. The genera *Geograpsus* and *Grapsus* have fossils known from the Holocene of Hawaii, i.e., *Geograpsus severnsi* [Paulay and Starmer, 2011](#), and the Holocene of the Pacific in Panama, i.e., *G. aff. G. grapsus* ([Luque et al., 2018](#)). The extant genus *Metopograpsus* has

two extinct species currently assigned to it, e.g., *M. badenis* [Müller, 2006](#), from the same middle Miocene (Badenian) locality in Hungary as *Pachygrapsus hungaricus*, and *M. traxleri* [Müller, 1998](#), from the lower Miocene (Karpatian) of Austria ([Hyzny, 2016](#); [Hyzny and Dulai, 2021](#)). While any of the fossil metopograpsid species could serve as potential good candidates as vetted calibration points for crown Grapsidae, the fragmentary holotypes missing the fronto-orbital margins make their systematic placement less confident than those fossils referred to *P. hungaricus*.

The extinct genus *Miograpsus* [Fleming, 1981](#), and its sole species *M. papaka* [Fleming, 1981](#), is represented by a well-preserved female holotype and a ventrally exposed paratype from a “silty sandstone pebble, not in place” (*ex-situ*) ([Fleming, 1981](#), p. 105), presumably from the lower Hurupi Formation, lower part of Tongaporutuan Stage (upper Miocene) of New Zealand. Although the genus *Miograpsus* has been placed within Grapsidae by several authors (e.g., [Feldmann, 1993](#); [Schweitzer et al., 2010](#)), it seems to have closer affinities to genera within ‘Varuninae’ (now considered its own family, Varunidae) (e.g., [Fleming, 1981](#); [Karasawa and Kato, 2001](#); [Webber et al., 2010](#)). Since *Miograpsus* is 1) an extinct genus, 2) slightly younger than the fossil record of crown genera such as *Pachygrapsus* and *Metopograpsus*, and especially 3) may have putative varunid affinities, we refrain from using this taxon as calibration point for crown Grapsidae. ‘*Nautilograpsoides*’ *prior* Smirnov, 1929, a fossil species from the lower Miocene of the Caucasus, is currently envisioned as a juvenile form of the portunid genus *Liocarcinus* ([Hyzný et al., 2022](#), and references therein).

*Pachygrapsus*, on the other hand, has a couple of fossil occurrences that can be assigned to this genus. Fragmentary cheliped remains of *Pachygrapsus* sp. are known from the upper Pleistocene of Jamaica ([Morris, 1993](#); [Luque et al., 2017](#)), and *P. hungaricus* is known from several tens of specimens from the middle Miocene (Badenian) of Europe (see above). Since *Pachygrapsus* is an extant genus with a good Miocene fossil record, as represented by the type series and

numerous additional specimens of *P. hungaricus*, we selected the latter as our calibration point for crown Grapsidae. The presence of *Pachygrapus* and *Metopograpsus* in the Miocene indicates that the most recent common ancestor of crown Grapsidae and all of its descendants must have a pre-Miocene origin, and likely rooted into the early Paleogene or Late Cretaceous.

### 13. Brachyura: Eubrachyura: Grapsoidea: Varunidae (crown)

**Fossil specimen.** *Brachynotus corallinus* Beschin, Busulini, De Angeli & Tessier, 2007. Museo di Archeologia e Scienze Naturali “G. Zannato” di Montecchio Maggiore, Vicenza, northern Italy. Holotype MCZ 1794, a nearly complete dorsal carapace (Fig 3H).

**Phylogenetic justification.** The overall carapace morphology indicates that the holotype of *Brachynotus corallinus* can be referred to crown Varunidae, which is fairly distantly related to Grapsidae, the eponym of the polyphyletic superfamily Grapsoidea (Chen et al., 2019; Lü et al., 2022; Tsang et al., 2022; Wolfe et al., 2022)

**Minimum age.** 47.8 Ma.

**Tip maximum age.** 56.0 Ma.

**Soft maximum age.** 100.9 Ma.

**Age justification.** This coral-associated fossil was collected from lower Eocene (Ypresian) marine calcareous rocks, exposed at the Contrada Gecchelina of Monte di Malo in Vicenza, northern Italy.



The faunal association includes foraminifera, corals, calcareous algae, and molluscs. Foraminifera like *Nummulites* cf. *partschi*, *N. tauricus*, and *N. nitidus*, indicate a middle–upper Ypresian age ([Beschinn et al., 2007](#)), and are stratigraphically correlated with the nearby ‘Rossi’ quarry (cava ‘Rossi’) ([Beschinn et al., 1998](#)).

**Discussion.** Other Paleogene fossils of crown Varuninae include *Brachynotus oligocenicus* De Angeli, Garassino and Ceccon, [2010b](#), a nicely preserved dorsal carapace from the early Oligocene of Vicenza, Italy ([De Angeli et al., 2010b](#)), confirming the presence of the genus and the family early in the Paleogene.

#### 14. Brachyura: Eubrachyura: Grapsoidea: Gecarcinidae (crown)

**Fossil specimen.** *Cardisoma guanhum* [Latreille](#), in Latreille, Le Peletier, Serville and Guérin, 1828. NCB – Naturalis, Leiden, The Netherlands, specimen NNM RGM 544 482, a large and mostly complete right chela preserving the dactylus and pollex.

**Phylogenetic justification.** *Cardisoma guanhum* is an extant gecarcinid species closely related to *Gecarcinus*, the type genus of the family Gecarcinidae. The phylogenetic position of Gecarcinidae is contentious with respect to other families within Grapsoidea. Recent nuclear and mitochondrial phylogenetic studies have recovered a non-monophyletic Grapsoidea, with gecarcinids closer to taxa within the families Sesarmidae and even Varunidae than to any taxon within Grapsidae (e.g., [Chen et al., 2019](#); [Liu et al., 2021](#); [Lü et al., 2022](#); [Tsang et al., 2022](#); [Wolfe et al., 2022](#)).

**Minimum age.** 0.0117 Ma.

780

781 ***Tip maximum age.*** 0.129 Ma.

782

783 ***Soft maximum age.*** 100.9 Ma.

784

785 ***Age justification.*** This fossil was collected in the Port Morant Formation, parish of St. Thomas, east  
 786 Port Morant Harbour, southeast Jamaica ([Collins and Donovan, 1997](#), [2012](#)). The Port Morant  
 787 Formation, has been dated as Middle-Upper Pleistocene ( $132 \pm 7$  kyr to  $125 \pm 9$  kyr, Sangamonian  
 788 Stage) based on electron spin resonance dating on samples of the coral species *Solenastrea bournoni*  
 789 and *Siderastrea radians* ([Mitchell et al., 2000](#); [Mitchell et al., 2001](#); [James-Williamson and](#)  
 790 [Mitchell, 2012](#)). Given the age uncertainty of the fossil specimens from the Port Morant Formation  
 791 with respect to the coral samples dated, we bracketed the soft maximum and minimum ages for the  
 792 fossil occurrences of *C. guanhimu* between the base and the top of the Late Pleistocene (0.129–  
 793 0.0117 Ma), although we expect to family as a whole to be much older than Pleistocene, most likely  
 794 originating in the Paleogene or possibly late Cretaceous (see in [Wolfe et al., 2022](#)).

795 Soft maximum age as for calibration 8.

796

797 ***Discussion.*** The fossil record of gecarcinid land crabs is sparse and fragmentary, and largely  
 798 represented by isolated claw remains (e.g., [Luque, 2017](#)) (Fig. 3I). To date, all of the known fossils  
 799 assignable to *Cardisoma* are Quaternary in age, i.e., late Pleistocene ([Collins and Donovan, 1997](#);  
 800 [Luque, 2017](#)) or late Holocene ([Luque, 2017](#); [Luque et al., 2017](#); [Luque et al., 2018](#)), making the  
 801 record from the upper Pleistocene of Jamaica the oldest fossil material referable to Gecarcinidae  
 802 with confidence.

803

## 15. Brachyura: Eubrachyura: Grapsoidea: Sesarmidae (crown)

**Fossil specimens.** Sesarmidae gen. et sp. indet., in Serrano-Sánchez et al. (2016). Museo de Paleontología “Eliseo Palacios Aguilera” (Secretaría de Medio Ambiente e Historia Natural), Calzada de los Hombres Ilustres s/n, Tuxtla Gutiérrez, Chiapas, Mexico, specimens with acronym IHNFG (Instituto de Historia Natural, Fósil Geográfico) IHNFG-4969, IHNFG-4970, IHNFG-4991, IHNFG-4992, and IHNFG-5555. A handful of specimens preserved in amber, mostly represented by complete dorsal and ventral carapaces with limbs attached (Serrano-Sánchez et al., 2016, figs 3, 4.1, 4.3–47; Luque et al., 2017, fig. 13L) (Fig. 3J).

**Phylogenetic justification.** Despite the unclear generic and specific affinities of the fossil grapsoids in amber from the Miocene of Chiapas, Mexico, the fossils can be assigned with confidence to crown Sesarmidae based on the overall morphology of the carapace and limbs (Serrano-Sánchez et al., 2016; Luque et al., 2017).

**Minimum age.** 23.0 Ma.

**Tip maximum age.** 23.03 Ma.

**Soft maximum age.** 100.9 Ma.

**Age justification.** These fossils were collected in rocks of the upper La Quinta Formation (Finca Carmitto Member) in Chiapas, México, dated as Lower Miocene (Aquitania, 22.8 Ma, in Serrano-Sánchez et al., 2015) based on the biostratigraphy of corals, molluscs, microfossils, and Strontium

isotopes ([Vega et al., 2009](#); [Serrano-Sánchez et al., 2015](#)). [Bernot et al. \(2022\)](#) highlighted that the absence of radiometric ages for La Quinta Formation precludes a more precise constrain of the possible age of the crab-bearing amber samples, and propose some tentative minimum ages based on previously reported benthic foraminiferal data from the overlying Mazantic Shale ([Solórzano Kraemer, 2007](#)), while indicating a  $^{87}\text{Sr}/^{86}\text{Sr}$  radiometric date of 23.0 Ma, roughly at the Oligocene–Miocene boundary, reported in Vega et al. ([2009](#)) (see [Bernot et al. \(2022\)](#) supplementary materials and reference therein). As such, given the uncertainty on the age of the crab-yielding amber deposits, we constrain the minimum age to the date reported by [Serrano-Sánchez et al. \(2015\)](#), and the tip maximum age to the base of the Aquitanian and thus the Miocene (23.03 Ma).

Soft maximum age as for calibration 8.

**Discussion.** Sesarmid crabs trapped in amber are known from the lower Miocene (Aquitanian) of Simojovel, Chiapas, Mexico ([Grimaldi, 1996](#); [Boucot and Poinar Jr, 2010](#); [Serrano-Sánchez et al., 2016](#); [Luque et al., 2017](#)). ‘*Sesarma*’ *paraensis* [Beurlen, 1958](#), presumably a fossil sesarmid from the Miocene Pirabas Formation of Pará, Brazil, cannot be confirmed to be a sesarmid as the specimen is not illustrated in the original paper by Beurlen (1958), but only a schematic line drawing reconstruction ([Beurlen, 1958](#), pl. IV, fig. 4). As such, as it stands today, this record cannot be reliably confirmed as a sesarmid. The only other sesarmid fossils known are cheliped remains from the upper Pleistocene of Jamaica previously described as a new species, *Sesarma primigenium* Collins, Mitchell and Donovan, [2009](#), but now considered a junior synonym of the extant species *Sesarma cookei* [Hartnoll, 1971](#), to which the fossilized cheliped remains above mentioned belong (see discussion in [Luque et al., 2017](#), p. 68, note 3).

## 16. Brachyura: Eubrachyura: Pseudothelphusoidea: Pseudothelphusidae (crown)

**Fossil specimen.** Pseudothelphusidae gen. & sp. indet. (in [Luque et al., 2019a](#)). Invertebrate Paleontology collections, Florida Museum of Natural History. Specimen UF XXXXX, a complete dorsal and ventral carapace, chelipeds, eyes, and proximal podomeres of pereopods, in volume (Fig. 4A).

**Phylogenetic justification.** The detailed preservation of diagnostic features in the fossil specimen, together with its stratigraphic and paleoenvironmental context, e.g., continental leaf-rich level of the Pedro Miguel Formation, allow its placement with certainty within the freshwater group Pseudothelphusidae, and thus as part of the crown Pseudothelphusoidea ([Luque et al., 2019a](#); Luque et al., under study).

**Minimum age.** 17.93Ma.

**Tip maximum age.** 18.18 Ma.

**Soft maximum age.** 100.9 Ma.

**Age justification.** This fossil pseudothelphusid specimen comes *in-situ* from a leaf-rich level of tuffaceous mudstones of the Pedro Miguel Formation, Panama Canal, Panama. U/Pb absolute ages from detrital zircons collected *in-situ* in two tuffaceous conglomerates that bracket a leaf-rich horizon reported by [Londoño et al. \(2018\)](#) from which the fossil pseudothelphusid comes, yielded an estimated depositional age of  $18.01 \pm 0.17$  Ma. Previous Ar/Ar dating from the Pedro Miguel Formation in other parts of the Canal by [Wegner et al. \(2011\)](#) has suggested an age of  $18.4 \pm 1.07$

Ma, and while details of the exact provenance of such samples within the formation are unclear (Montes et al., 2012; Farris et al., 2017), a corrected datum by MacFadden et al. (2014) suggests an age of  $18.90 \pm 0.59$  Ma.

Since the tuffaceous mudstone layer yielding the fossil leaves of Londoño et al. (2018) and the *in-situ* pseudothelphusid are bracketed by the same lower and upper tuffaceous conglomerates, both dated as  $18.01 \pm 0.17$  Ma, we assign the fossil a tip maximum age of 18.18 Ma, and a minimum age of 17.93 Ma, which are closer to the middle Burdigalian (late Early Miocene). As this fossil is clearly part of the crown Pseudothelphusidae (Luque et al., 2019a), the most recent common ancestor of all pseudothelphusids must have originated in the pre-Burdigalian, most likely the Paleogene.

Soft maximum age as for calibration 8.

**Discussion.** There are only two extant superfamilies of freshwater crabs in the Neotropics: Trichodactylidae and Pseudothelphusidae. While the fossil record of Trichodactylidae is represented by numerous cheliped fragments (see below), the fossil record of Pseudothelphusidae is otherwise unknown. The new fossil represents not only the first and thus oldest known fossil of the family, but one of the most complete fossil freshwater crabs known to date (Luque et al., 2019a; Luque et al., under study).

## 17. Brachyura: Eubrachyura: Trichodactyloidea: Trichodactylidae (crown)

**Fossil specimen.** Trichodactylidae genus and species indet. Museo de Historia Natural de la Universidad Nacional Mayor San Marcos de Lima (MUSM), Peru. Three claw fragments: CTA 47

(1 specimen) (Fig. 4B), and CTA 66 (two specimens), representing a small pollex (CTA 47), and a very small dactylus and a small pollex (CTA 66) ([Klaus et al., 2017](#), fig. 3D–E).

**Phylogenetic justification.** The preservation of diagnostic features on the fossilized dactyli and propodi and the teeth and interteeth on their cutting edges, together with their stratigraphic and continental limnic paleoenvironmental contexts, allow their placement within the family Trichodactylidae ([Klaus et al., 2017](#); [Luque et al., 2017](#)).

**Minimum age.** 40.94 Ma.

**Tip maximum age.** 43.44 Ma.

**Soft maximum age.** 100.9 Ma.

**Age justification.** These fossils were collected in the lower member of the Pozo Formation, middle and upper middle Eocene (lower Barrancan, >41.6–40.94 Ma,  $43.44 \pm 2.5$  Ma), Contamana area, Loreto, Peru. The ages are based on mammalian biochronology and  $^{40}\text{Ar}/^{39}\text{Ar}$  radiometric age ([Antoine et al., 2016](#); [Klaus et al., 2017](#)). The South American land mammal age (SALMA) known as Barrancan is largely equivalent to the uppermost global Lutetian and most of the Bartonian.

Soft maximum age as for calibration 8.

## 18. Brachyura: Eubrachyura: Epialtidae + Mithracidae (crown)

**Fossil specimen.** ‘*Micippa*’ *antiqua* Beschin, De Angeli, and Checchi, [2001](#). Museo Civico “G. Zannato” di Montecchio Maggiore, Vicenza, northern Italy. Holotype I.G. 286477, a complete dorsal carapace (Fig. 4C).

**Phylogenetic justification.** *Micippa* [Leach, 1817](#), is an extant genus that has been recovered by several authors as not clustering together with other mithracids (see [Windsor and Felder \(2014\)](#) and references therein). [Windsor and Felder \(2014\)](#) included *Micippa* and *Stenocionops* Desmarest, 1823, within the family Mithracidae *sensu lato*, and [Klompemaker et al. \(2015\)](#) also included them within this family in their revision of the fossil record of Mithracidae (see discussion below). Alternatively, [Poore and Ahyong \(2023\)](#) include *Micippa* within Epialtidae. As such, we consider ‘*Micippa*’ *antiqua* as a calibration point for Epialtidae + Mithracidae (crown) (see in [Wolfe et al., 2022](#)). The fossil record of pre-Cenozoic majoid crabs is one of the most problematic for brachyurans due to the anatomical disparity seen across taxa and its often fragmentary nature, and it is in need of future thorough revisions.

**Minimum age.** 27.82 Ma.

**Tip maximum age.** 33.9 Ma.

**Soft maximum age.** 100.9 Ma.

**Age justification.** The holotype of ‘*Micippa*’ *antiqua* was collected associated to shallow-water corals-bearing limestones from the Castelvomberto Formation (“Formazione di castelvomberto”) in



Vicenza, northern Italy ([Beschinn et al., 2001](#)). Large foraminifera such as *Nummulites fichteli*, *N. vasculus*, *Operculina complanata*, *Praerhapydionina delicata*, *Spirolina cylindracea*, *Peneroplis glynnjonesi*, and *Asterigerina rotula haeringensis* in the Castelvomberto Formation are indicative of the lower Oligocene (Rupelian, 33.9–27.82 Ma) biozones SB21–22A ([Ungaro, 1978](#); [Cahuzac and Poignant, 1997](#); [Nebelsick et al., 2013](#)).

Soft maximum age as for calibration 8.

**Discussion.** Among the extant mithracid genera with a known fossil record, *Micippa* has the oldest putatively confirmed occurrences, as represented by ‘*M.*’ *antiqua* from the lower Oligocene of Italy. Dorsal carapaces of two other micippid species, i.e., *M. annamariae* [Gatt and De Angeli, 2010](#), and *M. hungarica* (Lorentz in Lorentz & Beurlen, [1929](#)), are known from the middle Miocene of Malta and the middle–upper Miocene of Poland, Hungary, and Austria, respectively. This, together with some Miocene and several Pliocene and Pleistocene fossils referable to Mithracidae s.s. from the Caribbean ([Klompaker et al., 2015](#); [Luque et al., 2017](#)), indicate that mithracids were already present and widespread during the late Paleogene–early Neogene.

‘*Stenocionops*’ *suwanneeana* [Rathbun, 1935](#), from the upper Eocene fossil of Florida, USA, is a propodus that cannot be placed with confidence within any extant mithracid genus. “*Stenocionops*” *primus* [Rathbun, 1935](#), presumably from the Upper Cretaceous (Santonian?) of Arkansas, USA, is a fragmented cheliped manus of unclear affinities. *Antarctomithrax thomsoni* [Feldmann, 1994](#), from the Eocene of Antarctica, is an extinct monotypic genus described based on a partially preserved dorsal carapace that cannot be ascribed to Mithracidae with confidence.

## 19. Brachyura: Eubrachyura: Portunoidea: Eogeryonidae (stem)

**Fossil specimen.** *Eogeryon elegius* [Ossó, 2021](#). Museu de Geologia de Barcelona, holotype MGB 69151, a complete dorsal and ventral carapace in volume with cheliped associated ([Ossó, 2016, 2021](#)) (Fig. 4D).

**Phylogenetic justification.** In a recent morphological phylogenetic study incorporating fossil and extant brachyurans, Eogeryonidae has been recovered as a stem Portunoidea, sister to a clade formed by the extant families Carcinidae, Geryonidae, and Portunidae, and all of them together forming the total group Portunoidea ([Luque et al., 2021](#)).

**Minimum age.** 93.9 Ma.

**Tip maximum age.** 97.0 Ma.

**Soft maximum age.** 100.9 Ma.

**Age justification.** The type material of *Eogeryon elegius* comes from sandy limestones of the Villa de Vés Formation, exposed near the village of Condemios de Arriba, Northern Guadalajara Province, Spain. The presence of the ammonite *Vascoceras gamai* [Choffat, 1898](#), in the Villa de Vés Formation represents the upper part of the upper Cenomanian (lowermost Upper Cretaceous, 95–93 Ma), and it is found below the *Spathites (Jeanrogericeras) subconciliatus* Zone, which marks the end of Cenomanian ([Ossó, 2016](#)).

Soft maximum age as for calibration 8.

**Discussion.** The anatomical similarities of *Eogeryon* to portunoids such as *Geryon* suggest a potential proximity of Eogeryonidae to Geryonidae ([Ossó, 2016](#), [2021](#)). Several small dorsal carapaces of the eubrachyuran *Romualdocarcinus salesi* Prado and Luque *in* [Prado et al., 2018](#), from the upper Lower Cretaceous (Aptian–Albian, ~115–110 Ma) of Brazil, share some diagnostic features with *Eogeryon elegius* that suggest a plausible eogeryonid affinity, but due to their incompleteness, especially regarding the lack of ventral and cheliped material associated, a more precise phylogenetic placement of *R. salesi* is not possible at this time ([Prado et al., 2018](#)). *Eogeryon*, *Romualdocarcinus*, and other modern-looking crown eubrachyuran fossils, also share several general features with the remarkably well-preserved *Cretapsara athanata* Luque *in* Luque, Xing et al., [2021](#), from the lowermost Cenomanian (~99 Ma) of Burma (Myanmar), but *Cretapsara* differs from them in having a bilobate rostrum and lacking orbital fissures ([Luque et al., 2021](#)).

## 20. Brachyura: Eubrachyura: Portunoidea: Geryonidae (crown)

**Fossil specimen.** *Chaceon helmstedtense* ([Bachmayer and Mundlos, 1968](#)) (as *Coeloma* ?). Mundlos collection, geological-palaeontological collections of the Natural History Museum at Vienna, Austria. Holotype 1968/773/2, a complete dorsal carapace in volume with chelipeds and legs preserved (Fig. 4E).

**Phylogenetic justification.** The fossil species *Chaceon helmstedtense* can be assigned to the extant genus *Chaceon* [Manning and Holthuis, 1989](#), and thus the family Geryonidae, based on diagnostic features of the dorsal carapace outline, the orbitofrontal and anterolateral margins, the thoracic sternum, and the chelipeds. Molecular and morphological phylogenetic studies have recovered

1016 *Chaceon* and Geryonidae as nested within crown Portunoidea (e.g., [Karasawa et al., 2008](#);  
1017 [Spiridonov et al., 2014](#); [Evans, 2018](#); [Luque et al., 2021](#); [Wolfe et al., 2022](#)).

1018

1019 ***Minimum age.*** 27.82 Ma.

1020

1021 ***Tip maximum age.*** 33.9 Ma.

1022

1023 ***Soft maximum age.*** 97.0 Ma.

1024

1025 ***Age justification.*** The type locality of *Chaceon helmstedtense* is a marl/clay horizon (Mergel/Ton-

1026 Horizont, crab zone K I) in Helmstedt near Braunschweig, Lower Saxony, Northwestern Germany,

1027 considered lower Oligocene in age (Rupelian, 33.9–27.82 Ma). Associated molluscan fauna in the

1028 marl/clay beds includes “*Pecten corneus*, *Isocardia multicostata*, *Cardita latesulcata*, *Ostrea*

1029 *ventilabrum*, and *Ostrea queteleti*” ([Bachmayer and Mundlos, 1968](#)). As crown group members of

1030 Portunoidea cannot be older than their common ancestor shared with the stem group fossil *Eogeryon*

1031 ([Ossó, 2016](#)), a soft maximum age is taken from the maximum uncertainty on the age of the Villa de

1032 Vés Formation, at 97.0 Ma.

1033

1034 ***Discussion.*** Besides *Chaceon helmstedtense*, another occurrence of *Chaceon* in the Paleogene is *C.*

1035 *heimertingensis* ([Bachmayer and Wagner, 1957](#)), from the uppermost Oligocene (Chattian) of

1036 Austria. *Chaceon peruvianus* (D’[Orbigny, 1842](#), as *Portunus*) an iconic Miocene fossil crab from

1037 southern South America—mainly Argentina, but also Chile, Peru, and Uruguay (e.g., [Casadío et al.,](#)

1038 [2005](#); [Luque et al., 2017](#); [Perea et al., 2020](#), and references therein). This species has been reported

1039 from the Estancia 25 de Mayo Formation (previously known as Centinela Formation) in Tierra del

Fuego, Argentina, whose lower portion has been dated as upper Oligocene–Lower Miocene (Chattian–Aquitania, 27.28–20.44 Ma) based on  $^{87}\text{Sr}/^{86}\text{Sr}$  radioisotopic dating ages between 25.5–21.5 Ma from a valve of the oyster *Crassostrea? hatcheri* (Ortmann), collected below a tuff bed near the Oligocene–Miocene (Chattian–Aquitania) boundary ([Casadío et al., 2000](#); [Casadio et al., 2001](#); [Guerstein et al., 2004](#)), and the palynomorphs *Operculodinium israelianum*, *Spiniferites ramosus*, *Lingulodinium machaerophorum*, *Reticulatosphaera actinocoronata*, *Nematosphaeropsis* cf. *N. lativittata*, *Baumannipolis variapertatus*, *Mutisiapollis viteauensis*, *Nothofagidites* spp., and *Podocarpidites* spp. ([Guerstein et al., 2004](#)). As such, the most recent common ancestor of Geryonidae and all of its descendants must have originated in the pre-Oligocene.

## 21. Brachyura: Eubrachyura: Portunoidea: Portunidae: Thalamitinae (crown)

**Fossil specimen.** *Lessinithalamita gioiae* [De Angeli and Ceccon, 2015](#). Museo Civico di Valdagno, Italy. Holotype MCV14/15, a fairly complete dorsal carapace (Fig. 4F).

**Phylogenetic justification.** The extinct, monotypic genus *Lessinithalamita* [De Angeli and Ceccon, 2015](#), shows remarkable affinities with the extant genera *Thalamita* [Latreille, 1829](#), and *Thranita* [Evans, 2018](#), justifying its inclusion within the subfamily Thalaminitae, which is nested within the crown group Portunidae ([Evans, 2018](#)).

**Minimum age.** 47.8 Ma.

**Tip maximum age.** 53.3 Ma.

1064 ***Soft maximum age.*** 97 Ma.

1065

1066 ***Age justification.*** The specimen studied comes from compact calcarenites rich in coralline algae  
1067 (e.g., *Lithothamnium bolcensis*) and calcareous nannofossils rocks cropping out near Monte Magrè,  
1068 Vicenza, Italy, and dated approximately as lower Eocene (middle and upper Ypresian, ~53.3–47.8  
1069 Ma) ([Beccaro, 2003](#), in [De Angeli and Ceccon, 2012](#)).

1070 Soft maximum age as for calibration 20.

1071

1072 ***Discussion.*** Besides *Lessinithalamita gioiae*, there are two other species of Eocene thalamitine crabs  
1073 belonging to the extinct genus *Eocharybdis* Beschin, Busulini, De Angeli & Tessier, [2002](#), i.e., *E.*  
1074 *rugosa* Beschin, Busulini, Tessier & Zorzin, [2016a](#), from the lower Eocene (Ypresian) of Monte di  
1075 Malo, Verona, NE Italy, and *E. cristata* Beschin, Busulini, De Angeli & Tessier, [2002](#), from the  
1076 middle Eocene (Lutetian) Cava "Main" di Arzignano, Vicenza, Italy. While both of these species are  
1077 suitable candidates for calibration points for the subfamily Thalamitinae, the completeness of the  
1078 type material of *L. gioiae* and its similarities to *Thalamita* and *Thranita*, support a more reliable  
1079 affiliation to the crown Thalamitinae.

1080

1081

## 1082 **22. Brachyura: Eubrachyura: Portunoidea: Polybiidae (crown)**

1083 ***Fossil specimen.*** *Liocarcinus heintzi* [Schweitzer and Feldmann, 2010b](#). Muséum national d'Histoire  
1084 naturelle, Paris. Holotype MNHN R03778, a well-preserved dorsal carapace (Fig. 4G).

1085

1086 ***Phylogenetic justification.*** *Liocarcinus* [Stimpson, 1858](#), is an extant portunoid genus nested within  
1087 crown Polybiidae ([Evans, 2018](#)). The overall sub-hexagonal carapace of *L. heintzi*, slightly wider

1088 than long, with four anterolateral spines, the concave posterolateral margins, a convex posterior  
1089 margin, the orbits directed forward, and marked dorsal regions, seem to conform with the forms  
1090 seen among species of *Liocarcinus* ([Schweitzer et al., 2021c](#)).

1091  
1092 **Minimum age.** 27.82 Ma.

1093  
1094 **Tip maximum age.** 33.9 Ma.

1095  
1096 **Soft maximum age.** 97 Ma.

1097  
1098 **Age justification.** The studied specimen comes from the carbonatitic Calcaire à Astéries Formation,  
1099 cropping out near Monségur, Gironde, Western Aquitaine, France ([Schweitzer and Feldmann,](#)  
1100 [2010b](#)). The Calcaire à Astéries Formation has been dated as lower Oligocene (Rupelian, 33.9–27.82  
1101 Ma), based on the recognition of the foraminifera biozones SBZ 21 and 22A, containing *Nummulites*  
1102 *fichteli*, *N. intermedius*, *N. vascus*, *Spiroclypeus*, *Operculina*, *Halkyardia* spp., *Neorotalia* spp.,  
1103 *Peneroplis*, and *Arenagula* and the ostreid *Crassostrea longirostris* ([Cahuzac and Londeix, 2012](#);  
1104 [Sztrákos and Steurbaut, 2017](#)).

1105 Soft maximum age as for calibration 20.

1106  
1107 **Discussion.** Besides *Liocarcinus heintzi*, there are several other occurrences of polybiid and  
1108 polybiid-like genera and species in the Paleogene. *Archaeogeryon corsolini* (Casadío, De Angeli,  
1109 Feldmann, Garassino, Hetler, Parras and Schweitzer, [2004](#), as *Proterocarcinus*), and *A. lophos*  
1110 (Feldmann, Casadío, Chirino-Gálvez, and Aguirre-Urreta, [1995](#)), are known from the middle  
1111 Oligocene and Paleocene (Danian, 66.0–61.6 Ma) of Argentina, respectively ([Feldmann et al., 1995](#);

1112 [Casadío et al., 2004](#); [Casadío et al., 2005](#); [Feldmann et al., 2011b](#)). The latter species, represented by  
1113 the holotype and sole specimen, is moderately preserved and shows some dorsal and sternal features  
1114 that suggest affinity with portunids in general, but the fronto-orbital margin and part of the  
1115 anterolateral margins are eroded, precluding a detailed comparison with polybiids in general.  
1116 Moreover, the exact phylogenetic position of *Archaeogeryon* [Colosi, 1924](#), among portunoids, as  
1117 well as that of the also extinct genus *Gecchelicarcinus* Beschin, Busulini, De Angeli, and Tessier,  
1118 [2007](#), known from two species from the Ypresian of Italy, is unclear. Both taxa could represent  
1119 extinct polybiid genera, but they cannot be assigned to the crown group with certainty.

1120 The presumably polybiid monotypic extinct genera *Boschettia* Busulini, Tessier, Beschin,  
1121 and De Angeli, [2003](#), from the lower and middle Eocene (Ypresian to Lutetian, 56.0–41.2 Ma) of  
1122 Italy, and *Falsiportunites* [Collins and Jakobsen, 2003](#), from the middle Eocene (?Lutetian, 47.8–  
1123 41.2 Ma) of Denmark, show a combination of anatomical features on their fronto-orbital margins,  
1124 anterolateral margins, and dorsal carapaces that differ from those seen among polybiids and thus  
1125 cannot be accommodated satisfactorily among the crown group either.

1126 Among the extant genera with known fossil records, *Liocarcinus oligocaenicus* ([Pauca,](#)  
1127 [1929](#), as *Portunus*), and *L. atropatanus* ([Aslanova and Dschafarova, 1975](#)) are known from the  
1128 lower and upper Oligocene (Rupelian–Chattian, 33.9–23.3 Ma) of Romania and Azerbaijan,  
1129 respectively ([Schweitzer et al., 2009](#); [Beschinn et al., 2016b](#); [Hyzny, 2016](#)), which confirm the  
1130 presence of the genus during Oligocene times. *Liocarcinus priscus* Beschinn, De Angeli, Checci, and  
1131 Zarantonello, [2016b](#), from the lower Eocene (lower Lutetian, 47.8–41.2 Ma), may represent the  
1132 oldest occurrence of the genus and thus a more approximate soft maximum age of calibration for the  
1133 polybiid node, but due to its remarkable differences with the type species of the genus *Liocarcinus*,  
1134 i.e., *L. holsatus* ([Fabricius, 1798](#)), to which *L. heintzi* is anatomically closer, we favor the younger  
1135 fossil for a calibration point. Regardless of which of these fossils is considered the oldest reliable



record of the family, the clear occurrence of several Paleogene genera and species attributable to Polybiidae indicate that the most recent common ancestor of the family and all of its descendants originated most likely during the early Paleogene ([Wolfe et al., 2022](#)), or even the Late Cretaceous.

### 23. Brachyura: Eubrachyura: Parthenopoidea: Parthenopidae+Dairoididae (crown)

**Fossil specimen.** *Aragolambrus collinsi* Ferratges, Zamora, and Aurell, [2019](#). Palaeontological collection of the Museo de Ciencias Naturales de la Universidad de Zaragoza, Spain. Holotype MPZ-2019/211, a nearly complete dorsal carapace with chelipeds associated (Fig. 4H).

**Phylogenetic justification.** In a recent molecular phylogenetic study, [Wolfe et al. \(2022\)](#) recovered *Dairoides kusei* as sister to a monophyletic Parthenopidae, whereas [Ferratges et al. \(2023\)](#), based on a morphological phylogenetic study of Parthenopoidea, recovered the extinct monotypic genus *Aragolambrus* Ferratges, Zamora, and Aurell, [2019](#), in close proximity to the also extinct genus *Phrynolambrus* [Bittner, 1893](#), and the extant genus *Dairoides* [Stebbing, 1920](#), all three forming a well-supported monophyletic subfamily Dairoidinae sister to Daldorfiinae and nested within a paraphyletic Parthenopidae ([Ferratges et al., 2023](#)). Future comprehensive molecular phylogenetic studies with larger taxon coverage across multiple parthenopoid genera will shed light on the internal relationships among these groups.

**Minimum age.** 53.02 Ma.

**Tip maximum age.** 57.1 Ma.

1160 *Soft maximum age.* 100.9 Ma.

1161

1162 **Age justification.** *Aragolambrus collinsi* comes from the coral-algal Reef Limestones interval

1163 (middle member) of the Serraduy Formation, in the Barranco de Ramals outcrop near Puebla de

1164 Roda and Serraduy, Huesca province, Spain (Ferratges et al., 2019). The Reef Limestones interval

1165 develops over the underlying Alveolina Limestones interval and the overlying marls of the Riguala

1166 Member ([Serra-Kiel et al., 1994](#); [Pujalte et al., 2009](#)). [Serra-Kiel et al. \(1994\)](#) assigns an age of

1167 lower Ilerdian to the Alveolina Limestones interval, which is located within the

1168 magnetostratigraphic Chron C24r (57.101–53.9 Ma, [Francescone et al., 2019](#); [Ogg, 2020](#)), and

1169 contains the macroforaminifera *Alveolina cucumiformis*, *A. ellipsoidalis*, and *Nummulites fraasi*,

1170 from the NP9, BB1, and P6a Biozones. For the marls of the Riguala Member, the same authors

1171 assigns an age of middle Ilerdian, roughly located between the top of the magnetostratigraphic

1172 Chron C24r and Chron C24n.1r (~53.9–53.02 Ma, [Francescone et al., 2019](#); [Ogg, 2020](#)), and

1173 contains the macroforaminifera *Alveolina moussoulensis*, *A. corbarica*, *Nummulites robustifrons*,

1174 and *N. exilis*, from the BB1–BB2, NP9–NP10, and P6a–P6b Biozones ([Serra-Kiel et al., 1994](#)). Due

1175 to the lateral facial discontinuity of the Reef Limestones interval, which is bounded at the bottom by

1176 the Alveolina Limestones and at the top by the Riguala Member, we bracket the tip maximum and

1177 minimum ages of *A. collinsi* between 57.1–53.02 Ma, with a possible age of the fossil itself closer to

1178 53.5 Ma (F. Ferratges, pers. comm. to J. Luque, Feb. 2023).

1179 Soft maximum age as for calibration 8.

1180

1181 **Discussion.** *Aragolambrus* and *Phrynomambrus* are two of the oldest fossils of crown Parthenopidae

1182 known, sharing with *Dairoides* the presence of two to three anterolateral spines, an ornamented

1183 epistomia with one or more rows of tubercles, and the pterygostome with grooves, which are

1184 synapomorphies that unite them among parthenopoids under the subfamily Dairoidinae ([Ferratges et](#)  
1185 [al., 2023](#)).

1186 The extinct genera *Eogarthambrus* De Angeli, Garassino, and Alberti, [De Angeli et al.,](#)  
1187 [2010a](#), and *Mesolambrus* [Müller and Collins, 1991](#), both known from the Eocene (middle Ypresian  
1188 to Priabonian, ~52.0–33.9 Ma) of Italy, were recovered by [Ferratges et al. \(2023\)](#) outside the crown  
1189 Parthenopoidea. The monotypic extinct genus *Braggilambrus* [De Angeli and Caporiondo, 2016](#),  
1190 from the Ypresian of Italy, seems to fit within the general parthenopoidean body form, but due to its  
1191 incompleteness and therefore lack of key diagnostic characters, its affinities at the family and  
1192 subfamily levels is still unclear.

1193 The presence of several crown parthenopid forms across the early to late Eocene indicate  
1194 that the most recent common ancestor of Parthenopoidea and all of its descendants must have  
1195 Paleocene or even Late Cretaceous origins.

1196

1197

## 1198 **24. Brachyura: Eubrachyura: Calappoidea: Calappidae (crown)**

1199 **Fossil specimen.** *Calappa zinsmeisteri* [Feldmann and Wilson, 1988](#). Smithsonian Institution,  
1200 National Museum of Natural History (NMHN), USA. Holotype USNM 404877, claws only (Fig.  
1201 4I,J).

1202

1203 **Phylogenetic justification.** *Calappa* [Weber, 1795](#), is the type genus of the family Calappidae [De](#)  
1204 [Haan](#), 1833, and thus phylogenetically nested within the crown Calappoidea ([Lu et al., 2020](#)).

1205

1206 **Minimum age.** 33.9 Ma.

1207

1208 *Tip maximum age.* 41.2 Ma.

1209

1210 *Soft maximum age.* 100.9 Ma.

1211

1212 **Age justification.** The type material of *Calappa zinsmeisteri* comes from the uppermost La Meseta  
1213 Formation on Seymour Island, Antarctica, Locality 14, of [Feldmann and Wilson \(1988\)](#). This  
1214 locality corresponds to the Telms VI–VII of [Sadler \(1988\)](#), which have been dated as middle to  
1215 upper Eocene (Bartonian–Priabonian, ~42.0–34.0 Ma) based on  $^{87}\text{Sr}/^{86}\text{Sr}$  radiometric dating ages  
1216 from *Cucullaea* shells from Telm VII between 46.13 and 34.69 Ma ([Dutton et al., 2002](#)), and the  
1217 occurrences of the neogastropods *Prosipho lawsi*, *P. lamesetaensis*, *Austroficopsis meridionalis*,  
1218 *Microfulgur byrdis*, *Fusinus? suraknisos*, *Eupleura suroabditia*, *?Adelomelon suropsilos*, *Zemacies*  
1219 *finlayi*, and *Aforia canalomos* ([Crame et al., 2014](#)).

1220 Soft maximum age as for calibration 8.

1221

1222 **Discussion.** Among the extant calappid genera, only *Calappa* and *Mursia* Leach, in [Desmarest,](#)  
1223 [1823](#), have recognized Eocene fossils, to our knowledge. Four species of *Calappa*—including *C.*  
1224 *zinsmeisteri*— are known from the middle and upper Eocene of USA, Antarctica, and presumably  
1225 Venezuela, and are constituted largely by cheliped (propodi) remains with diagnostic anatomical  
1226 details that can be assigned with certainty to crown Calappidae, and most likely to *Calappa* ([Ross et](#)  
1227 [al., 1964](#); [Feldmann and Wilson, 1988](#); [Luque et al., 2017](#)). One species of *Mursia* Leach, in  
1228 [Desmarest, 1823](#), i.e., *Mursia aspina* [Schweitzer and Feldmann, 2000a](#), from the Late Eocene of  
1229 Washington, USA, is represented by a handful of dorsal carapaces that strongly resemble *Mursia*,  
1230 although they lack some of the diagnostic features of the genus such as developed lateral spines.  
1231 While we considered the cheliped remains of *Calappa zinsmeisteri* as our calibration point given

their putative affinities to the type genus of the family, *M. aspina*, which is represented by dorsal carapace material of similar age as *C. zinsmeisteri*, could also be a good candidate to calibrate the node for crown Calappidae.

Among the extinct calappid genera, *Calappilia* A. Milne-Edwards in [de Bouillé, 1873](#), bears conspicuous anatomical similitudes with *Calappa*, and has over 20 species known, of which more than 15 are Eocene in age (e.g., [Williams and Child, 1988](#); [Schweitzer et al., 2010](#); [Rumsey et al., 2016](#); [Luque et al., 2017](#); [Feldmann et al., 2019](#), and references therein). There are also several extinct genera known exclusively from the Eocene, such as the monotypic genera *Paracorallomursia* Beschin, Busulini, Tessier & Zorzin, [2016a](#), and *Pseudocorallomursia* Beschin, Busulini, Tessier & Zorzin, [2016a](#), from the Ypresian of Italy, *Carinocalappa* Beschin, Busulini, and Tessier in [Beschin et al., 2018](#), from the Priabonian of Italy, and *Tavernolesia* [Artal and Onetti, 2017](#), from the Lutetian of Spain. *Corallomursia* [De Angeli and Ceccon, 2014](#), comprises two species, both from the Ypresian of Italy ([Beschin et al., 2015](#)). All of these extinct genera seem to fit well within the total group Calappidae, but their precise affinities with crown calappids remain unclear.

Calappid crabs were already diverse, speciose, and widespread by the Eocene, indicating that the most recent common ancestor of Calappidae and all of its descendants must have originated in the earliest Paleogene (Paleocene) or the Cretaceous.

## **25. Brachyura: Eubrachyura: Cancroidea: Cancridae (crown)**

**Fossil specimen.** *Anatolikos undecimspinosus* Schweitzer, Feldmann, González-Barba, and Čosović, [2006](#). Museo de Historia Natural, Universidad Autónoma de Baja California Sur, La Paz, Baja

1255 California Sur, México (MHN-UABCS). Holotype MHN-UABCS/Ba12-9, a partially preserved  
1256 dorsal left carapace (Fig. 4K).

1257

1258 **Phylogenetic justification.** The extant genus *Anatolikos* [Schweitzer and Feldmann, 2000b](#), can be  
1259 placed with confidence within the family Cancridae ([Schweitzer et al., 2006](#); [Schram and Ng, 2012](#);  
1260 [Wolfe et al., 2022](#)). The diagnostic shape and arrangement of the eleven anterolateral spines seen in  
1261 the extant genus *Anatolikos* and thus in *A. undecimspinosus*, together with the presence of a nearly  
1262 straight rostrum with “five coalesced spines separated by fissures” ([Schweitzer and Feldmann,](#)  
1263 [2000b](#)) are unique traits not shared with other genera within the family ([Schweitzer et al., 2006](#);  
1264 [Poore and Ah Yong, 2023](#)).

1265

1266 **Minimum age.** 41.2 Ma.

1267

1268 **Tip maximum age.** 56.0 Ma.

1269

1270 **Soft maximum age.** 100.9 Ma.

1271

1272 **Age justification.** The type material of *Anatolikos undecimspinosus* comes from middle Eocene  
1273 rocks of the Bateque Formation, cropping out at locality Waypoint 29 of [Schweitzer et al. \(2006\)](#),  
1274 northwest of La Paz, near the village of San Ignacio, Baja California Sur, Mexico. The age of the  
1275 Bateque Formation has been constrained between the early Eocene and the late middle Eocene  
1276 (56.0–41.2 Ma) based on foraminiferal, nannoplankton, and diatom assemblages, more than 150  
1277 macroinvertebrates, and ostracods ([Mina-Uhink, 1957](#); [Sorensen, 1982](#); [McLean et al., 1987](#);  
1278 [Carreño and Cronin, 1993](#); [Morales-Ortega et al., 2016](#)).

1279 Soft maximum age as for calibration 8.

1280

1281 **Discussion.** Among the cancrids with known fossil record, only the Cancrinae genera *Anatolikos*  
 1282 and presumably *Cancer* [Linnaeus, 1758](#), have Eocene occurrences. However, *Cancer gabbi*  
 1283 [Rathbun, 1926](#), from the Eocene of California, is represented by claw fragments only that cannot be  
 1284 confirmed to belong to the group. *Cancer meticuriensis* [Thurmann, 1853](#), from the Oligocene and  
 1285 presumably from the lower Eocene of France, is too incomplete, with only the sternum and the  
 1286 underside of the front legs known, which A. [Milne-Edwards \(1865\)](#) considered to most likely belong  
 1287 to a portunid. At least six species (*C. aldenardensis*, *C. archiaci*, *C. flandricus*, *C. pratti*, 1850, *C.*  
 1288 *rotnacensis*, and *C. villabersiani*) from the Ypresian–Lutetian of Europe, are all *nomina nuda*, many  
 1289 of which have never been described or figured, and therefore their generic affinities are dubious  
 1290 ([Van Straelen, 1920](#); [Nations, 1975](#)). *Cancer santosi* ([Rathbun, 1937](#), as *Lobocarcinus*?) from the  
 1291 upper Eocene of Panama, is a poorly preserved right dorsal carapace.

1292 Three extinct monotypic genera with potential Carcininae affinities have also early to middle  
 1293 Eocene occurrences, i.e., *Santeecarcinus* [Blow and Manning, 1996](#), and *Sarahcarcinus* [Blow and](#)  
 1294 [Manning, 1996](#), both from USA, and *Notocarcinus* [Schweitzer and Feldmann, 2000b](#), from  
 1295 Argentina. However, given that these three genera are extinct only, we consider them suboptimal  
 1296 candidates for the calibration of the Cancridae node, given the presence of fossil taxa assigned to  
 1297 extant genera, e.g., *Anatolikos undecimspinosus*, in rocks of similar ages.

1298 Several other extinct cancrroid genera currently placed within the subfamily Lobocarcininae  
 1299 Beurlen, 1930 (e.g., [De Grave et al., 2009](#); [Schweitzer et al., 2010](#)), also have their oldest or only  
 1300 records in the Eocene. These include *Miocyclus* [Müller, 1978](#), from Bulgaria, *Nicoliscarcinus*  
 1301 Beschin, Busulini, Tessier & Zorzin, [2016a](#), and *Ramacarcinus* De Angeli & Ceccon, [2017](#), from  
 1302 Italy, and *Tasadia* Müller, in [Janssen and Muller, 1984](#), from Belgium. In addition, two out of the

three species of the extinct genus *Ceronnectes* [De Angeli and Beschin, 1998](#), and several species of *Lobocarcinus* [Reuss, 1857](#), also occur in the middle Eocene (e.g., [Anderson and Feldmann, 1995](#); [De Angeli and Beschin, 1998](#); [Feldmann et al., 1998](#); [Schweitzer et al., 2010](#); [Beschin et al., 2016a](#)).

1306

1307

## 26. Brachyura: Eubrachyura: Dorippoidea (crown)

**Fossil specimen.** *Bartethusa hepatica* [Quayle and Collins, 1981](#). Palaeontological Department, London's Natural History Museum (formerly British Museum (Natural History)), England, holotype BM In.61704, a well-preserved dorsal carapace (Fig. 5A).

1312

**Phylogenetic justification.** *Bartethusa hepatica* has an overall carapace outline, fronto-orbital construction, and dorsal carapace region configuration that matches the range of forms seen across crown dorippoids. While *Bartethusa hepatica* could be allied to either Ethusidae [Guinot, 1977](#) (e.g., [Quayle and Collins, 1981](#); [Van Bakel et al., 2021](#)) or Dorippidae [MacLeay, 1838a](#) (e.g., [Luque, 2015b](#); [Schweitzer et al., 2021a](#); [Guinot, 2023](#)), in either case it will still be nested within the crown Dorippoidea [MacLeay, 1838a](#).

1319

**Minimum age.** 37.71 Ma.

1321

**Tip maximum age.** 41.2 Ma.

1323

**Soft maximum age.** 100.9 Ma.

1325



1326 **Age justification.** The type material of *Bartethusa hepatica* was collected in rocks of the Horizon  
1327 A3, Barton Beds, Christchurch Bay, Isle of Wight, England ([Quayle and Collins, 1981](#)), which have  
1328 been dated as middle Eocene (Bartonian, 41.2–37.71 Ma) based on larger and smaller foraminifera,  
1329 calcareous nannofossils, palynomorphs, and paleomagnetism (see [Cotton et al., 2021](#), and references  
1330 therein). [Tsang et al. \(2014\)](#) also used *B. hepatica* as their calibration point, but they assigned it an  
1331 age of lower Eocene (Ypresian, 56.0–47.8 Ma). However, the available stratigraphic information  
1332 indicates that the correct age of the known fossils of *B. hepatica* is middle Eocene (Bartonian, 41.2–  
1333 37.71 Ma) and not Ypresian, based on larger and smaller foraminifera, calcareous nannofossils,  
1334 palynomorphs, and paleomagnetism (see [Cotton et al., 2021](#), and references therein).

1335         Soft maximum age as for calibration 8.

1336

1337 **Discussion.** Dorippoid crabs—extant and fossil—are among the most puzzling of the eubrachyurans  
1338 in terms of their phylogenetic affinities, given their unique combination of plesiomorphic and  
1339 apomorphic characters and their relatively low representation in previous molecular phylogenies  
1340 compared to most other crabs. Based on morphology alone, dorippoids have been typically regarded  
1341 as some of the oldest crown eubrachyurans, and thus one of the earliest splitting branches in the  
1342 eubrachyuran tree, with their earliest known representatives, e.g., Telamonocarcinidae [Larghi, 2004](#),  
1343 and potentially Tepexicarcinidae [Luque, 2015b](#), already present in the Early Cretaceous ([Luque,](#)  
1344 [2015b](#); [Luque et al., 2021](#); [Van Bakel et al., 2021](#)). Although their overall anatomy is strongly  
1345 reminiscent of the array of body forms across modern dorippoids in terms of their dorsal carapaces,  
1346 thoracic sternum, and shape and size of their pereopods (P2–P5), they cannot be assigned to any of  
1347 the two crown families recognized today, i.e., Dorippidae and Ethusidae. Some of these other extinct  
1348 families, however, may represent convergent morphology, as dorippoids consistently nest well  
1349 within heterotremes in molecular phylogenies ([Tsang et al., 2014](#); [Wolfe et al., 2022](#)).

1350 Among the extinct post-Cretaceous dorippoid forms, *Goniochele* [Bell, 1858](#), presumably  
1351 belonging to its own family Goniochelidae [Schweitzer and Feldmann, 2011](#), has a confirmed fossil  
1352 record restricted to two Eocene species: *G. angulata* [Bell, 1858](#), from the Ypresian of England, and  
1353 *G. madseni* [Collins and Jakobsen, 2003](#), from the Ypresian–Lutetian of Denmark. However, the few  
1354 similarities between Goniochelidae and some members of Dorippoidea s.s. might be convergent and  
1355 not reflecting shared ancestry ([Guinot, 2023](#)). [Rathbun \(1918 \[1919\]\)](#), based on an isolated dactylus  
1356 from the Early Miocene (not Oligocene, as Rathbun suggested) Culebra Formation in the Panama  
1357 Canal, erected a third species of *Goniochele*, *G. armata* [Rathbun, 1918 \[1919\]](#), that currently cannot  
1358 be ascribed to this genus with certainty (see [Luque et al., 2017](#)). Another extinct taxon,  
1359 *Archaeocypoda veronensis* [Secrétan, 1975](#), known from the lower Eocene (upper Ypresian) of Italy  
1360 ([Pasini et al., 2019](#)), has been presumably assigned to Dorippidae based on the sub-oval carapace  
1361 outline, the broad front and continuous supraorbital margin, the smooth anterolateral and  
1362 posterolateral margins, the inflated protogastric and branchial regions, the smooth antero- and  
1363 posterolateral margins ([Casadío et al., 2005](#); [Pasini et al., 2019](#); [Schweitzer et al., 2021a](#)). While  
1364 these features match some of the diagnostic characters of dorippids, the possession of at least three  
1365 pairs of well-developed pereopods (i.e., P2–P4) dramatically differs from the apomorphic dorippoid  
1366 possession of two large pereopods (P2–P3) and two reduced, subchelate, and sub-dorsally carried  
1367 pereopods (P4–P5), which is a feature seen across crown dorippoids and even stem dorippoids from  
1368 the Cretaceous (e.g., [Larghi, 2004](#); [Casadío et al., 2005](#); [Luque, 2015b](#); [Guinot et al., 2019](#); [Guinot,](#)  
1369 [2023](#)). As such, while *A. veronensis* might (or might not) be related to crown Dorippoidea, its  
1370 systematic affinities remain unclear. Another taxon, the presumed genus *Titanodorippe* [Blow and](#)  
1371 [Manning, 1996](#), from the middle Eocene of USA, is a single cheliped propodus that cannot be  
1372 assigned with confidence to Dorippidae or even Dorippoidea.

Among the extant dorippoid genera, only *Ethusa* Roux, 1830 [in [Roux, 1828-1830](#)], has its oldest record in the uppermost Eocene (Priabonian, 37.71–33.9 Ma) ([Müller and Collins, 1991](#)), while *Dorippe* [Weber, 1795](#), and *Medorippe* [Manning and Holthuis, 1991](#), are known from the lower-middle Miocene (Burdigalian, 20.44–15.97 Ma) ([Studer, 1892](#); [Karasawa, 2000](#)). Given the close proximity in age between the occurrences of *Bartethusa* and *Ethusa* from the middle and late Eocene, respectively, the most recent common ancestor of crown Dorippoidea and all of its descendants must have originated during the early Paleogene or even the Cretaceous, while the presence of several potential stem dorippoids in the Early and Late Cretaceous worldwide support a late Mesozoic origin for the superfamily.

## 27. Brachyura: Eubrachyura: Leucosioidea: Leucosiidae (crown)

**Fossil specimen.** *Typilobus alponensis* Beschin, De Angeli, and Zorzin, [2009](#). Museo di Storia Naturale di Verona. Holotype IGVR78539, a complete dorsal carapace in volume (Fig. 5B).

**Phylogenetic justification.** The overall oval and domed carapace about as long as wide, with convex anterolateral and posterolateral margins, a narrow posterior margin, the small and round orbits, and the presence of a projected bilobed front/rostrum that is mesially depressed, are typical features of Leucosiidae, an extant family nested within Leucosioidea ([Beschin et al., 2009](#)).

**Minimum age.** 47.8 Ma.

**Tip maximum age.** 56.0 Ma.

1397 *Soft maximum age.* 100.9 Ma.

1398

1399 *Age justification.* The holotype and sole specimen of *Typilobus alponensis* comes from lower

1400 Eocene (Ypresian, 56.0–47.8 Ma) rocks cropping out in the valley of Alpone, near Monte Serea, San

1401 Giovanni Ilarione, Verona, Italy ([Beschin et al., 2009](#)).

1402 Soft maximum age as for calibration 8.

1403

1404 *Discussion.* *Typilobus* [Stoliczka, 1871](#), is an extinct genus with presumably over a dozen species

1405 ranging in age from early Eocene (Ypresian) to Miocene and widely distributed across Europe, the

1406 UK, North Africa, Asia, and the Indo-Pacific ([Karasawa, 1998](#); [Beschin et al., 2009](#); [Artal and](#)

1407 [Hyžný, 2016](#); [Karasawa et al., 2019](#)). However, several of these species are considerably different

1408 from the type species of the genus, *T. granulatus* [Stoliczka, 1871](#), from the Early Miocene of

1409 Pakistan, casting doubts on the monophyletic nature of the genus as currently envisioned.

1410 Regardless of the generic affinities of *Typilobus alponensis*, this species fits well within the overall

1411 body plan seen across crown Leucosiidae (see above under *Phylogenetic justification*), hence our

1412 species selection for the calibration of the node. Other Eocene species assigned to *Typilobus* that

1413 might be related to *T. alponensis* and thus belong to the crown Leucosiidae are *T. belli* [Quayle and](#)

1414 [Collins, 1981](#), from the Bartonian of the UK, *T. prevostianus* ([Desmarest, 1822](#), as *Leucosia*), from

1415 the Lutetian of Paris, *T. semseyanus* [Lorenthey 1898](#), from the Lutetian–Priabonian of Hungary and

1416 Italy ([Lorenthey and Beurlen, 1929](#); [Beschin et al., 1998](#)), and *T. trispinosus* [Lorenthey, 1907](#), from

1417 the Lutetian–Priabonian of Egypt ([Beschin et al., 1998](#); [Feldmann et al., 2011a](#); [Artal and Hyžný,](#)

1418 [2016](#)).

1419 The type material of the monotypic genus *Zannatoius* Beschin, Busulini & Tessier in

1420 [Beschin et al., 2018](#), from the upper Eocene of Italy, is somewhat damaged and missing the fronto-

orbital margin, but overall it conforms with the leucosiid body plan. Among the extant leucosiid genera with known fossil record, *Ebalia* [Leach, 1817](#), has its earliest putative occurrence in the upper Eocene (Priabonian, 37.71–33.9 Ma) of Germany ([Förster and Mundlos, 1982](#); [Karasawa et al., 2019](#)). As such, the presence of crown Leucosiidae in the early and late Eocene suggests that the family must have originated at least during the early Paleogene.

## 28. Brachyura: Eubrachyura: Goneplacoidea: Euryplacidae (crown)

**Fossil specimens.** *Chirinocarcinus wichmanni* (Feldmann, Casadío, Chirino-Galvez, and Aguirre-Urreta, [1995](#)) (as ?*Glyphithyreus*). Geology Collections at National University of La Pampa, Santa Rosa, La Pampa, Argentina. Holotype GHUNLPam 7015, a nearly complete dorsal carapace (Fig. 5C).

**Phylogenetic justification.** *Chirinocarcinus wichmanni* has been included within Euryplacidae based on the relatively broad fronto-orbital margin and large orbits, the well-defined supraorbital angle, and short anterolateral margins ([Feldmann et al., 1995](#); [Karasawa and Kato, 2003](#); [Castro and Ng, 2010](#)).

**Minimum age.** 61.6 Ma.

**Tip maximum age.** 66.0 Ma.

**Soft maximum age.** 100.9 Ma.

1445 **Age justification.** The type material of *Chirinocarcinus wichmanni* was collected from lowermost  
 1446 Paleocene (lower Danian) rocks of the Roca Formation at the type section, located to the north of  
 1447 General Roca, Rio Negro, Neuquén Province, Argentina ([Feldmann et al., 1995](#)). The Roca  
 1448 Formation has been dated as uppermost Cretaceous (Maastrichtian) to lower Paleocene (Danian),  
 1449 based on foraminifera, calcareous nannoplankton, and palynomorphs ([del Rio et al., 2011](#) and  
 1450 references therein). The crab-bearing intervals of the Roca Formation are comprised within the  
 1451 calcareous nannofossil zones NP3 and NP4, with *Chiasmolithus danicus*, *Neochiastozygus modestus*,  
 1452 *Hornibrookina edwardsii*, *H. teuriensis*, and *Toweius africanus* from NP3, indicative of the lower  
 1453 Danian ([del Rio et al., 2011](#)).

1454         Soft maximum age as for calibration 8.

1455

1456 **Discussion.** Goneplacoidea, as traditionally envisioned, is among the most anatomically disparate  
 1457 and problematic brachyuran groups in terms of the clarity about their internal phylogenetic  
 1458 affinities, and thus their likely polyphyletic relationships with other eubrachyuran groups ([Ng et al.,](#)  
 1459 [2008](#); [Castro et al., 2010](#)). The extant family Euryplacidae, however, seems to be monophyletic  
 1460 ([Castro and Ng, 2010](#)) and nested within the crown Goneplacoidea ([Karasawa and Kato, 2003](#)).

1461         Among the euryplacid genera, the monotypic *Chirinocarcinus* [Karasawa and Schweitzer,](#)  
 1462 [2004](#), is the only taxon known from Paleocene fossils. Five other monotypic genera currently  
 1463 assigned to Euryplacidae are known from the lower Eocene (Ypresian) of Italy and the middle  
 1464 Eocene (Lutetian) of Spain ([Karasawa and Kato, 2003](#); [Beschin and De Angeli, 2011](#); [Beschin et al.,](#)  
 1465 [2016a](#)), as it is the genus *Corallicarcinus* [Müller and Collins, 1991](#), from Eocene fossils from  
 1466 Hungary and Italy ([Müller and Collins, 1991](#); [Karasawa and Kato, 2003](#); [Beschin et al., 2018](#)).  
 1467 Similarly, the genus *Orbitoplax* [Tucker and Feldmann, 1990](#), also referable to Euryplacidae, is

known from four Eocene species occurring in Mexico and USA (e.g., [Rathbun, 1926](#); [Tucker and Feldmann, 1990](#); [Schweitzer, 2000](#); [Vega et al., 2001](#)).

Among the extant euryplacid genera, *Eucrate* [De Haan, 1835](#), has its oldest putative record in the Oligocene, as represented by a fairly complete ventral carapace with chelipeds of *E. martini* [Rathbun, 1926](#) from USA, and *E. puliensis* Hu & Tao, 1996, from Taiwan. *Euryplax culebrensis* [Rathbun, 1918 \[1919\]](#), from the Panama Canal Zone, is of lower Miocene age and not Oligocene, just like the other fossil decapods from the Culebra Formation in the Panama Canal, as initially assumed by Rathbun and repeated by several authors (see in [Luque et al., 2017](#) and comments therein).

The number of extinct and extant euryplacids known from the Paleogene, and the proximity of *C. wichmanni* to the Cretaceous/Paleogene boundary, indicates that Euryplacidae must have a pre-Cenozoic origin, most likely in the Cretaceous.

1480

1481

## 29. Brachyura: Eubrachyura: Eriphioidea: Eriphiidae (crown)

**Fossil specimens.** *Eriphia verrucosa* ([Forsk., 1775](#)), in [Betancort et al., 2014](#). Repository indet. Specimen number indet. Single left cheliped fragment with palm and pollex (Fig. 5 D,E).

1485

**Phylogenetic justification.** The type species of *Eriphia* [Latreille, 1817](#), is *E. verrucosa* ([Forsk., 1775](#)) [*E. spinifrons* ([Herbst, 1782](#))], by subsequent designation (see in [Koh and Ng, 2008](#); [Ng et al., 2008](#)). Although Eriphioidea as previously envisioned is shown to be polyphyletic (see Wolfe et al., 2022), *Eriphia* is the type genus of the family Eriphiidae and thus the superfamily Eriphioidea. As such, it is reliably placed within the crown group.

1491

1492 **Minimum age.** 4.1 Ma.

1493

1494 **Tip maximum age.** 9.3 Ma.

1495

1496 **Soft maximum age.** 100.9 Ma.

1497

1498 **Age justification.** The specimen of *E. verrucosa* reported by [Betancort et al., 2014](#) comes from  
1499 rocks of the Papagayo cliff, Lanzarote, Canary Islands, Spain, dated as upper Miocene (Messinian?)  
1500 to lower Pliocene from K/Ar radiometric dating, ranging between 9.3 and 4.1 Ma (see in [Betancort](#)  
1501 [et al., 2014](#), and references therein).

1502 Soft maximum age as for calibration 8.

1503

1504 **Discussion.** The family Eriphiidae, as currently recognized, includes only the extant genera *Eriphia*  
1505 [Latreille, 1817](#), and *Eriphides* [Rathbun, 1897](#) ([Ng et al., 2008](#); [De Grave et al., 2009](#)). While  
1506 *Eriphides* is monotypic, *Eriphia* is represented by eight extant and two fossil species ([Koh and Ng,](#)  
1507 [2008](#); [Schweitzer et al., 2010](#)). The extinct *Eriphia cocchii* [Ristori, 1886](#), is known from well-  
1508 preserved specimens in volume as well as from isolated dactyli from the lower Pliocene (Zanclean–  
1509 Piacentian, ~5,33–3.6 Ma) of Italy ([Ristori, 1886](#); [De Angeli et al., 2009](#)) (Fig. 5F). Based solely on  
1510 an isolated propodus, [Collins and Donovan, 1997](#), report a presumably new species, *Eriphia*  
1511 *xaymacaensis* [Collins and Donovan, 1997](#), from the upper Pleistocene of Jamaica ([Luque et al.,](#)  
1512 [2017](#)). The latter species, however, might be a junior synonym of *Eriphia gonagra* [Fabricius, 1781](#),  
1513 an extant species. Along these lines, among the extant species with putative fossils, [Varola \(1981\)](#)  
1514 reported isolated dactyli of the extant species *E. verrucosa* from the mid-Pliocene of Italy, and



1515 [Luque et al., 2018](#), reported a cheliped of *Eriphia* cf. *squamata* [Stimpson, 1859](#), from the  
1516 Quaternary of Panama.

1517 As we show here, the fossil record of Eriphiidae is meager and restricted to the uppermost  
1518 Neogene and Quaternary, hence why we opt to use a calibration fossil with uncertain specimen data.  
1519 As such, the most recent common ancestor of extant eriphiids and all of its descendants must have  
1520 originated at least in the early Neogene or, most likely, in the Palaeogene.

1521

1522

### 1523 **30. Brachyura: Eubrachyura: Trapezioidea: Trapeziidae (crown)**

1524 **Fossil specimen.** *Archaeotetra lessinea* [De Angeli and Ceccon, 2013](#). Museo Civico “D. Dal Lago”  
1525 of Valdagno (Vicenza) (MCV). Holotype MCV 12/05-I.G.360311, a complete dorsal carapace (Fig.  
1526 5G).

1527

1528 **Phylogenetic justification.** Phylogenetically, Trapeziidae [Miers, 1886](#) seems to be a monophyletic  
1529 family nested within Trapezioidea s.l. ([Castro et al., 2004](#); [Lai et al., 2009](#); [Wolfe et al., 2022](#)), but  
1530 the monophyly of Trapezioidea as a whole, containing Tetrallidae Castro, Ng, and Ahyong, [2004](#),  
1531 has been questioned (see [Wolfe et al., 2022](#)). Despite this, the distinctive carapace outline of  
1532 *Archaeotetra* [Schweitzer, 2005](#), and thus of *Archaeotetra lessinea*, with a wide and slightly bilobed  
1533 front, the fronto-orbital margin being about 80–90% as wide as the carapace maximum width, the  
1534 orbits placed anterolaterally, the smooth dorsal carapace, and the seemingly spineless, short, and  
1535 nearly parallel anterolateral margins, conforms with the body form typical of genera and species in  
1536 the family Trapeziidae ([Schweitzer, 2005](#); [Karasawa and Schweitzer, 2006](#); [De Angeli and Ceccon,](#)  
1537 [2013](#); [Poore and Ahyong, 2023](#)).

1538

1539 **Minimum age.** 47.8 Ma.

1540

1541 **Tip maximum age.** 53.3 Ma.

1542

1543 **Soft maximum age.** 100.9 Ma.

1544

1545 **Age justification.** The material studied comes from micritic limestones with abundant nullipore  
1546 coralline algae and fragments of invertebrates, cropping out in the vicinity of Monte Magré, eastern  
1547 margin of Lessini Mounts, Italy. Age as for calibration 21.

1548 Soft maximum age as for calibration 8.

1549

1550 **Discussion.** Among the few trapeziid crab fossils known, at least four species besides *Archaeotetra*  
1551 *lessinea* have been recovered from Eocene deposits. *Archaeotetra inornata* [Schweitzer, 2005](#), is  
1552 known from the lower to middle Eocene of Mexico, *Paratetralia convexa* Beschin, Busulini, De  
1553 Angeli, and Tessier, [2007](#), from the lower Eocene of Italy, and *Eomaldivia pannonica* and *E.*  
1554 *trispinosa* [Müller and Collins, 1991](#), from the upper Eocene of Hungary. This indicates that the most  
1555 recent common ancestor of trapeziid crabs and all of its descendants must have a pre-Eocene origin  
1556 ([Wolfe et al., 2022](#)).

1557

1558

### 1559 **31. Brachyura: Eubrachyura: Eriphioidea: Oziidae (crown)**

1560 **Fossil specimen.** *Ozius collinsi* [Karasawa, 1992](#). Mizunami Fossil Museum (Yamanouchi,  
1561 Mizunami, Japan). Holotype MFM39001, a complete dorsal carapace (Fig. 5H).

1562

1563 **Phylogenetic justification.** The extant genus *Ozius* Milne Edwards, 1834 [in H. [Milne Edwards,](#)  
1564 [1834-1840](#)] is the type genus of the family Oziidae. The overall anatomy of *Ozius collinsi* fits well  
1565 the diagnosis of the genus, and thus can be considered within the crown Oziidae s.s.

1566

1567 **Minimum age.** 13.82 Ma.

1568

1569 **Tip maximum age.** 15.97 Ma.

1570

1571 **Soft maximum age.** 100.9 Ma.

1572

1573 **Age justification.** The type material of *Ozius collinsi* comes from mudstones of the Yoshino  
1574 Formation, Katsuta Group, Locality KTT13, in Niida, Tsuyama City, Okayama Prefecture, Japan  
1575 ([Karasawa, 1992](#)). The Yoshino Formation is considered as uppermost lower Miocene to middle  
1576 Miocene (Burdigalian to Langhian), with some estimated ages of  $17.9 \pm 2.1$  Ma and 18.5–16 Ma  
1577 based on the fission track method and palynomorphs ([Mori and Yamanoi, 2003](#); [Suzuki et al., 2003](#),  
1578 in [Ando et al., 2016](#)), and on mollusc assemblages and planktonic foraminifera biostratigraphic ages,  
1579 zones N8 to N10 ([Blow, 1969](#); [Yoshimoto, 1979](#), in [Karasawa, 1992](#) and [Taguchi, 2002](#)), which  
1580 correspond to the global Burdigalian. Other authors have restricted the age of the oldest fossil  
1581 Oziidae from Japan to the Langhian ([Schweitzer et al., 2021b](#)).

1582 Soft maximum age as for calibration 8.

1583

1584 **Discussion.** In some recent mitogenomic studies, oziid taxa such as *Epixathus frontalis* have been  
1585 recovered outside the traditional Eriphioidea, highlighting the polyphyletic nature of the superfamily  
1586 as traditionally envisioned ([Tan et al., 2018](#); [Lü et al., 2022](#)), and further corroborated in [Wolfe et al.](#)

1587 [\(2022\)](#). Moreover, previous groupings of genera within the family Oziidae have been shown to be  
1588 non-monophyletic ([Lai et al., 2014](#)), further adding to the phylogenetic issues highlighted above.  
1589 This also adds to the problem that several extinct forms that might superficially resemble oziids  
1590 might not necessarily belong to Oziidae s.s., which, together with their incompleteness, preclude a  
1591 confident systematic placement. As such, due to the considerably reliable placement of *O. collinsi*  
1592 within the genus *Ozius*, and due to its early-mid Miocene age, we consider it as the best calibration  
1593 point for the family currently available.

1594

1595

### 1596 **32. Brachyura: Eubrachyura: Pilumnoidea: Pilumnidae (crown)**

1597 **Fossil specimen.** *Glabropilumnus trispinosus* Beschin, Busulini, and Tessier, in [Besch et al.,](#)  
1598 [2016a](#). Museo di Storia naturale di Verona. Holotype VR 94508, a complete dorsal carapace in  
1599 volume (Fig. 5I).

1600

1601 **Phylogenetic justification.** The overall carapace shape of *G. trispinosus*, with smooth dorsal surface  
1602 and lacking dorsal ridges, and the anterolateral margin with 3 spines, being the posterior one the  
1603 smallest of all, match well the diagnosis of *Glabropilumnus* ([Poore and Ahyong, 2023](#)).

1604 *Glabropilumnus* [Balss, 1932](#), is an extant genus represented by six extant species ([Ng et al., 2008](#)),  
1605 and the only genus in the Family Pilumnidae [Samouelle, 1819](#), and the subfamily Pilumninae  
1606 [Samouelle, 1819](#), with a fossil record extending into the Eocene (see below), hence our taxon  
1607 selection for calibration.

1608

1609 **Minimum age.** 47.8 Ma.

1610

1611 ***Tip maximum age.*** 56.0 Ma.

1612

1613 ***Soft maximum age.*** 100.9 Ma.

1614

1615 ***Age justification.*** *Glabropilumnus trispinosus* is known from its type locality in the area of Rama di  
1616 Bolca (Verona), NE Italy, in calcareous rocks of the ‘Calcari Nummulitici’ that have been ascribed  
1617 to the lower Eocene (Ypresian) based of the presence of *Nummulites partschi*, *Alveolina cremae*, *A.*  
1618 *croatica*, *A. decastroi*, *A. cf. dainellii*, and *A. distefanoi* ([Beschinn et al., 2016a](#), and references  
1619 therein).

1620 Soft maximum age as for calibration 8.

1621

1622 ***Discussion.*** Pilumnid genera and species show a considerable anatomical disparity. Although  
1623 previous molecular and mitogenomic phylogenetic studies have suggest that Pilumnidae, in the  
1624 broad sense, is monophyletic ([Lai et al., 2014](#); [Duan et al., 2022](#)), the monophyly of Pilumnidae as  
1625 currently envisioned is questionable ([Wolfe et al., 2022](#)). Despite this, *Glabropilumnus* can be  
1626 referred to the subfamily Pilumninae in the strict sense, and thus to the crown Pilumnidae ([Poore](#)  
1627 [and Ahyong, 2023](#)).

1628 There are several extinct genera of Eocene crabs from Europe and USA that have been  
1629 tentatively assigned to Pilumnidae and, specifically, the subfamily Pilumninae. However, the only  
1630 extant pilumnid genus with Eocene representatives known is *Glabropilumnus* [Balss, 1932](#). Besides  
1631 *G. trispinosus*, *G. bizzarini* Beschinn, Busulini, and Tessier, in [Beschinn et al., 2019](#), is known from  
1632 the upper Eocene (Priabonian) of Italy, together with *G. cf. granulatus* De Angeli, Garassino &  
1633 Ceccon, [2010b](#), which was previously known solely from the lower Oligocene of Italy ([Beschinn et](#)

1634 [al., 2019](#)). As such, the most recent common ancestor of Pilumnidae and all of its descendants must  
1635 be pre-Eocene.

1636

1637

### 1638 **33.Brachyura: Eubrachyura: Goneplacoidea: Goneplacidae (crown)**

1639 ***Fossil specimens.*** *Carcinoplax temikoensis* [Feldmann and Maxwell, 1990](#). New Zealand Geological  
1640 Survey, Lower Hutt, New Zealand. Holotype AR 1943, a complete dorsal carapace and a cheliped  
1641 (Fig. 5J).

1642

1643 ***Phylogenetic justification.*** *Carcinoplax temikoensis* can be assigned to *Carcinoplax* [Milne](#)  
1644 [Edwards, 1852](#), based on the transversely rectangular carapace, the forward directed, narrow orbits,  
1645 and the presence of three spines on the anterolateral margin, including the one forming the outer  
1646 orbital angle ([Feldmann and Maxwell, 1990](#); [Ng and Castro, 2020](#)). *Carcinoplax* is nested within  
1647 Goneplacidae ([Karasawa and Kato, 2003](#)).

1648

1649 ***Minimum age.*** 34.6 Ma.

1650

1651 ***Tip maximum age.*** 39.1 Ma.

1652

1653 ***Soft maximum age.*** 100.9 Ma.

1654

1655 ***Age justification.*** The type material of *Carcinoplax temikoensis* was collected from the lower part  
1656 (unit 2) of the Island Sandstone at Te Miko, locality K30/D7A, exposed along the coast between  
1657 Perpendicular Point and Punakaiki, north of Greymouth, Westland, New Zealand, ascribed to the

upper Eocene (Kaiatan to Runangan) based on foraminiferal assemblages ([Feldmann and Maxwell, 1990](#)). The Kaiatan (39.1–36.7 Ma) and Runangan (36.7–34.6 Ma) stages in New Zealand roughly correspond to the global uppermost Bartonian (41.2–37.71 Ma) and Priabonian (37.71–33.9 Ma) ages ([Raine et al., 2015](#)). Given the unclear exact age of the layers bearing the type material of *C. temikoensis*, for the time being, we bracket its tip maximum and minimum ages between the base of the Kaiatan and the top of the Runangan (i.e., 39.1–34.6 Ma).

Soft maximum age as for calibration 8.

**Discussion.** Currently, there are 25 species referred to *Carcinoplax* ([Ng and Castro, 2020](#)). As previously discussed for Euryplacidae (see above), the superfamily Goneplacoidea is an anatomically disparate and problematic brachyuran groups in terms of the clarity about its internal phylogenetic affinities ([Ng et al., 2008](#); [Castro et al., 2010](#)). Despite this, *Carcinoplax* fits well within Goneplacidae and thus belongs to the crown Goneplacoidea.

There are over a dozen species of *Carcinoplax* known from fossils, from which only *C. temikoensis* occur in the Eocene. Extinct, monotypic genera known from the Eocene and presumably with goneplacid affinities include *Amydrocarcinus* Schweitzer, Feldmann, González-Barba, and Vega, [2002](#), from the Bartonian of Mexico, and *Gonioplacoides* [Quayle and Collins, 2012](#), from the upper Eocene of UK. The presence of extinct and extant goneplacid genera in the Eocene indicate that the most recent common ancestor of Goneplacidae and all of its descendants must be at least early Eocene in age, but, as previously seen with most other families already discussed, its origins might lie in the Paleocene ([Wolfe et al., 2022](#)).

### 34. Brachyura: Eubrachyura: Xanthoidea: Pseudorhombilidae (crown)

**Fossil specimens.** *Pseudorhombila patagonica* [Glaessner, 1933](#). Collections of the British Museum.

Holotype In. 28031, a complete dorsal carapace (Fig. 5K).

**Phylogenetic justification.** The genus *Pseudorhombila* H. Milne Edwards, 1834 [in [1834-1840](#)], has been recovered nested within a monophyletic Xanthoidea, but its familial placement has been included either within Pseudorhombilidae [Alcock, 1900](#) (e.g., [Thoma et al., 2014](#)), or within the subfamily Pseudorhombilinae under the family Panopeidae [Ortmann, 1893](#), and besides other subfamilies such as Panopeinae, Melybiinae, and an unnamed subfamily (e.g., [Mendoza et al., 2022](#)). In our study (Wolfe et al., 2022), *Pseudorhombila* was recovered in a clade formed by several genera typically ascribed to Pseudorhombilidae, which in turn was recovered as sister to a clade formed by several genera ascribed to Panopeidae. As such, here we consider Pseudorhombilidae as a discrete family.

**Minimum age.** 5.333 Ma.

**Tip maximum age.** 23.03 Ma.

**Soft maximum age.** 100.9 Ma.

**Age justification.** The type specimen of *Pseudorhombila patagonica* was collected from the so-called Patagonian Beds, in the Santa Cruz Province, Argentina, which have been considered Miocene in age ([Glaessner, 1933](#), [1969](#)). Unfortunately, it comes from an old collection, and its



1704 precise lithostratigraphic and chronostratigraphic context is unclear, hence the broad minimum and  
1705 soft maximum age bracket.

1706 Soft maximum age as for calibration 8.

1707

1708 **Discussion.** Pseudorhombilidae [Alcock, 1900](#), is a small family of xanthoid crabs with eight extant  
1709 genera and over a dozen species known to date ([Ng et al., 2008](#); [De Grave et al., 2009](#)). In our study  
1710 (Wolfe et al., 2022), species within Pseudorhombilidae form a monophyletic group sister to  
1711 Panopeidae. To date, the only known fossil referable to the family is *P. patagonica*, a member of the  
1712 extant genus *Pseudorhombila* H. Milne Edwards, 1834 [in [1834-1840](#)], therefore it is our selection  
1713 of fossil for calibration.

1714

1715

### 1716 **35. Brachyura: Eubrachyura: Xanthoidea: Panopeidae (crown)**

1717 **Fossil specimens.** *Panopeus incisus* Beschin, Busulini, De Angeli, and Tessier, [2007](#). Museo di  
1718 Archeologia e Scienze Naturali “G. Zannato” di Montecchio Maggiore, Vicenza, northern Italy.  
1719 Holotype MCZ 2009, a nearly complete dorsal carapace (Fig. 5L).

1720

1721 **Phylogenetic justification.** *Panopeus incisus* was ascribed to *Panopeus* H. Milne Edwards, 1834 [in  
1722 [1834-1840](#)], based on the wide, subhexagonal carapace, the broad and mesially notched front, the  
1723 sub-ovate orbits bearing two orbital fissures, and the well-developed anterolateral margin with four  
1724 spines excluding the outer orbital spine ([Schweitzer, 2000](#); [Beschlin et al., 2007](#)). *Panopeus* is an  
1725 extant genus, the type genus of the family Panopeidae [Ortmann, 1893](#), and together with other  
1726 panopeid species forms a clade nested within Xanthoidea ([Jennings et al., 2021](#); [Mendoza et al.,](#)  
1727 [2022](#)Thoma et al., 2014; [Wolfe et al., 2022](#)).

1728

1729 ***Minimum age.*** 47.8 Ma.

1730

1731 ***Tip maximum age.*** 56.0 Ma.

1732

1733 ***Soft maximum age.*** 100.9 Ma.

1734

1735 ***Age justification.*** The type material of *Panopeus incisus* comes from lower Eocene rocks cropping  
1736 out at the Contrada Gecchelina of the Monte di Malo in Vicenza, northern Italy ([Beschin et al.,](#)  
1737 [2007](#), see also [Beschin et al., 2016a](#)). Age as for calibration 13.

1738 Soft maximum age as for calibration 8.

1739

1740 ***Discussion.*** Panopeidae is a speciose group of xanthoid crabs with an early fossil record extending  
1741 back into the Paleogene Period. Among the extant panopeid genera, only *Panopeus*, *Lophopanopeus*  
1742 [Rathbun, 1898](#), and *Metopocarcinus* [Stimpson, 1860](#), have putative occurrences in the Eocene  
1743 ([Beschin et al., 2016b](#); [Pasini et al., 2019](#)), with *Panopeus* being represented by multiple species  
1744 (e.g., [Schweitzer, 2000](#); [Vega et al., 2008](#); [Gatt and De Angeli, 2010](#); [Beschin et al., 2013](#); [Beschin](#)  
1745 [et al., 2016a](#); [Beschin et al., 2018](#), and references therein). While there are numerous extinct  
1746 presumed panopeid genera with Eocene representatives, only *Pakicarcinus* Schweitzer, Feldmann  
1747 and Gingerich, [2004](#), and *Glyphithyreus* [Reuss, 1859](#), have pre-Eocene (upper? Paleocene)  
1748 occurrences ([Collins and Morris, 1978](#); [Charbonnier et al., 2013](#); [Schweitzer et al., 2016b](#)).

1749 The presence of numerous species of extinct and extant panopeid genera in the Eocene and  
1750 apparently the late Paleocene, suggest that the origins of the family are rooted into the early  
1751 Paleogene.

1752  
1753  
1754  
1755  
1756  
1757  
1758  
1759  
1760  
1761  
1762  
1763  
1764  
1765  
1766  
1767  
1768  
1769  
1770  
1771  
1772  
1773  
1774

### **36. Brachyura: Eubrachyura: Xanthoidea: Xanthidae (crown)**

**Fossil specimens.** *Phlyctenodes edwardsi* Beschin, Busulini, Tessier, and Zorzin, [2016a](#). Museo di Storia naturale di Verona. Holotype VR 94284, a complete dorsal carapace (Fig. 5M).

**Phylogenetic justification.** The genus *Phlyctenodes* [Milne-Edwards, 1862a](#) is ascribed to Xanthidae, specifically the subfamily Actaeinae [Alcock, 1898](#), based on the ovate and wide carapace with poorly defined dorsal regions, the large and rimmed sub-circular orbits lacking orbital fissures, the anterolateral margins moderately convex and bearing several small tubercles or spines, the smooth posterolateral margins nearly straight to weakly concave, the overall fronto-orbital margin configuration, a front that is wide and bearing four or more tubercles, and the overall outline of the frontal and anterolateral margins forming a wide arch ([Busulini et al., 2006](#); [Beschin et al., 2016a](#); [Schweitzer et al., 2021d](#)). The monophyletic status of the family Xanthidae [MacLeay, 1838b](#), has been corroborated by several molecular and total evidence phylogenetic studies (e.g., [Lai et al., 2011](#); [Tsang et al., 2014](#); [Mendoza et al., 2022](#); [Wolfe et al., 2022](#)).

**Minimum age.** 47.8 Ma.

**Tip maximum age.** 56.0 Ma.

**Soft maximum age.** 100.9 Ma.

1775 **Age justification.** *Phlyctenodes edwardsi* is known from its type locality in the area of Rama di  
1776 Bolca (Verona), NE Italy, in calcareous rocks of the ‘Calcari Nummulitici’ that have been ascribed  
1777 to the lower Eocene (Ypresian) ([Beschinn et al., 2016a](#)). Age as for calibration 32.

1778 Soft maximum age as for calibration 8.

1779

1780 **Discussion.** *Phlyctenodes* is an extinct genus with most of its species occurring in the Eocene of  
1781 Europe ([Busulini et al., 2006](#)). We chose *P. edwardsi* as our calibration point given its Ypresian  
1782 (56.0–47.8 Ma) age, which is similar to the age assigned to *P. multituberculatus* Beschinn, Busulini,  
1783 De Angeli, and Tessier, [2007](#), and *P. nicolisi* Bittner, 1884, from the Ypresian of Italy. *Phlyctenodes*  
1784 *tuberculosis* [Milne-Edwards, 1862a](#), from the middle–upper Eocene (41.2–47.8 Ma) of France and  
1785 Italy, was used by [Tsang et al. \(2014\)](#), [Wolfe et al. \(2019\)](#), and [Mendoza et al. \(2022\)](#) as their  
1786 calibration points. [Beschinn et al. \(2016a\)](#) reported this species also from the Ypresian of Italy, in the  
1787 Bolca region from where *P. edwardsi* originated. As such, given the numerous species of  
1788 *Phlyctenodes* now known from the Ypresian, any of those species would represent equally  
1789 parsimonious choices of calibration points, and all would indicate that the most recent common  
1790 ancestor of xanthid crabs and all of its descendants must have originated in the pre-Eocene.

1791

## ACKNOWLEDGEMENTS

We thank Matúš Hyžný, Àlex Ossó, Barry van Bakel, Fernando Ari Ferratges, Carrie Schweitzer, and Orangel Aguilera, for facilitating us bibliographic references and for valuable discussion about the systematic affinities and potential ages of some of taxa here investigated. Special thanks to Pierre Olivier Antoine (Université de Montpellier, France), Pedro Artal (Museo Geológico del Seminario de Barcelona, Spain), Barry van Bakel (Oertijdmuseum De Groene Poort, Boxten, the Netherlands), Juan Francisco Betancort (Universidad de Las Palmas de Gran Canaria, Spain), Lisa Boucher and Ann Moliénux (UT Austin, USA), Alessandra Busulini (Museo di Storia Naturale, Venezia, Italy), Antonio De Angeli (Museo Civico “G. Zannato”, Montecchio Maggiore, Vicenza, Italy), Alfréd Dulai (Hungarian Natural History Museum, Hungary), Rodney Feldmann and Carrie Schweitzer (Kent State University, USA), Fernando Ari Ferratges (Universidad de Zaragoza, Spain), Richard Howard (NHM London, UK), Matus Hyzny (Comenius University, Slovakia), Hiroaki Karasawa (Mizunami Fossil Museum, Japan), Adiël Klomp maker (Alabama), Àlex Ossó (Tarragona, Catalonia), and Francisco Vega (UNAM, Mexico), for their kind help providing several of the images of the fossil specimens here illustrated. We thank the National Science Foundation (NSF), DEB grants #1856667 and #1856679 (USA) for supporting this work. This is contribution #X from the Coastlines and Oceans Division of the Institute of Environment at Florida International University.

## REFERENCES

- Agnew, J., 2001, Taxonomy, taphonomy, and paleoecology of the Plio-Pleistocene shell beds at 101 Ranch Pit, Okeechobbe County, Florida [Masters of Science thesis: Gainesville, Florida, USA, 219 p.
- Aguilera, O., Martins, M. V. A., Linhares, A. P., Kütter, V. T., and Coletti, G., 2022, Palaeoenvironment of the Miocene Pirabas Formation mixed carbonate–siliciclastic deposits, Northern Brazil: Insights from skeletal assemblages: Marine and Petroleum Geology, v. 145, p. 105855.
- Ahyong, S. T., Lai, J. C. Y., Sharkey, D., Colgan, D. J., and Ng, P. K. L., 2007, Phylogenetics of the brachyuran crabs (Crustacea: Decapoda): The status of Podotremata based on small subunit nuclear ribosomal RNA: Molecular Phylogenetics and Evolution, v. 45, no. 2, p. 576–586.
- Ahyong, S. T., Baba, K., Macpherson, E., and Poore, G. C., 2010, A new classification of the Galatheaidea (Crustacea: Decapoda: Anomura): Zootaxa, v. 2676, no. 1, p. 57–68.
- Ahyong, S. T., 2019, The cymonomid crabs of New Zealand and Australia (Crustacea: Brachyura: Cyclodoripoida): Records of the Australian Museum, v. 71, no. 2, p. 33–69.
- Alcock, A., 1898, Materials for a carcinological fauna of India. No. 3. The Brachyura Cyclometopa. Part I. The family Xanthidae: Journal of the Asiatic Society of Bengal, v. 67, no. 2, p. 67–233.
- Alcock, A., 1900, Materials for a carcinological fauna of India, No. 6. The Brachyura Catometopa, or Grapsoidea: Journal of the Asiatic Society of Bengal, v. 69, no. 2–3, p. 279–456.
- Anderson, J. L., and Feldmann, R. M., 1995, *Lobocarcinus lumacopius* (Decapoda: Cancridae), a new species of cancrinid crab from the Eocene of Fayum, Egypt: Journal of Paleontology, v. 69, no. 5, p. 922–932.
- Ando, Y., Kishimoto, S., and Kawano, S., 2016, Two new species of Thalassina (Decapoda, Thalassinidae) from the Miocene of Japan: Neues Jahrbuch für Geologie und Paläontologie-Abhandlungen, p. 107–117.
- Antoine, P.-O., Abello, M. A., Adnet, S., Sierra, A. J. A., Baby, P., Billet, G., Boivin, M., Calderón, Y., Candela, A., and Chabain, J., 2016, A 60-million-year Cenozoic history of western Amazonian ecosystems in Contamana, eastern Peru: Gondwana Research, v. 31, p. 30–59.

- 1840 Antonioli, L., de Araújo Távora, V., and Dino, R., 2015, Palynology of carcinolites and limestones  
1841 from the Baunilha Grande Ecofacies of the Pirabas Formation (Miocene of Pará state,  
1842 northeastern Brazil): Journal of South American Earth Sciences, v. 62, p. 134–147.
- 1843 Armstrong, A., Nyborg, T., Bishop, G. A., Ossó-Morales, À., and Vega, F. J., 2009, Decapod  
1844 crustaceans from the Paleocene of Central Texas, USA: Revista Mexicana de Ciencias  
1845 Geológicas, v. 26, no. 3, p. 745–763.
- 1846 Artal, P., 2008, *Uca miocenica* (Crustacea, Decapoda), nueva especie del Mioceno de la Prov. de  
1847 Barcelona (Cataluña, España): Scripta Musei Geologici Seminarii Barcinonensis  
1848 (Palaeontologica), v. 6, p. 3–18.
- 1849 Artal, P., and Hyžný, M., 2016, An appraisal of *Typilobus* Stoliczka, 1871 (Crustacea, Brachyura,  
1850 Leucosioidea), with description of a new family and genus: Zootaxa, v. 4117, no. 3, p. 387-  
1851 398.
- 1852 Artal, P., and Onetti, A., 2017, *Tavernolesia*, new genus (Crustacea, Decapoda, Brachyura), from  
1853 the Eocene of the Iberian Peninsula: Batalleria, v. 24, p. 6–12.
- 1854 Aslanova, S., and Dschafarova, J., 1975, Some finds of Decapoda from the Tertiary deposits of  
1855 Azerbaijan: Akademia nauk Azerbaidzhanskoi Soviet Socialist Republic Doklady, v. 31, no.  
1856 7, p. 41–46.
- 1857 Bachmayer, F., and Wagner, R., 1957, *Geryon heimertingensis* n. sp., eine Krabbbe aus dem  
1858 Chattian der Erdölbohrung Heimertingen (bayerische Vorlandmolasse): Paläontologische  
1859 Zeitschrift, v. 31, no. 1/2, p. 99–102.
- 1860 Bachmayer, F., and Mundlos, R., 1968, Die tertiären Krebse von Helmstedt bei Braunschweig,  
1861 Deutschland: Annalen des Naturhistorischen Museums in Wien, p. 649–692.
- 1862 Balss, H., 1932, Über einige systematisch interessante Xanthidae (Crustacea, Decapoda, Brachyura)  
1863 der Harmsschen Reisen nach dem Sundaarchipel: Zeitschrift für Wissenschaftliche Zoologie,  
1864 v. 142, no. 4, p. 510–519.
- 1865 Batllori, J., and García, J. J., 1997, Malacofauna d'un manglar del Miocè de Bellaterra (depressió del  
1866 Vallès-Penedès, Barcelona): Butlletí de la Institució Catalana d'Història Natural, p. 15–21.
- 1867 Beccaro, L., 2003, Revisioni stratigrafiche nel Paleocene del Veneto occidentale [Dottorato di  
1868 Ricerca in Scienze della Terra, Ciclo XVI: Unpublished Ph. D. Thesis, Università degli Studi  
1869 di Padova, Padova., 200 p.

- 1870 Bell, T., 1858, A monograph of the fossil malacostracous Crustacea of Great Britain. Part I.  
1871 Crustacea of the London Clay: Monograph of the Palaeontographical Society, v. 10, p. i-viii,  
1872 1–44, 11 pls.
- 1873 Bell, T., 1863, A monograph of the Fossil Malacostracous Crustacea of Great Britain. Part II.  
1874 Crustacea of the Gault and Greensand: Monograph of the Palaeontographical Society, v. 14,  
1875 p. vii + 40 pp., pls. 41–11.
- 1876 Bernot, J. P., Owen, C. L., Wolfe, J. M., Meland, K., Olesen, J., and Crandall, K. A., 2022, Major  
1877 revisions in pancrustacean phylogeny and evidence of sensitivity to taxon sampling:  
1878 Molecular Biology and Evolution, v. 40, no. 8, p. msad175.
- 1879 Beschin, C., Busulini, A., De Angeli, A., Tessier, G., and Ungaro, S., 1998, Crostacei eocenici di  
1880 “Cava Rossi” presso Monte di Malo (Vicenz – Italia settentrionale): Studi Trentini di  
1881 Scienze Naturali – Acta Geologica v. 73, no. 1996, p. 7–34.
- 1882 Beschin, C., De Angeli, A., and Checchi, A., 2001, Crostacei decapodi associati a coralli della  
1883 “Formazione di Castelgomberto”(Oligocene)(Vicenza—Italia settentrionale): Studi e  
1884 Ricerche, Associazione Amici del Museo, Museo Civico “G. Zannato”, Montecchio  
1885 Maggiore (Vicenza), v. 2001, p. 13-30.
- 1886 Beschin, C., Busulini, A., De Angeli, A., and Tessier, G., 2002, Aggiornamento ai crostacei eocenici  
1887 di cava “Main” di Arzignano (Vicenza-Italia settentrionale) (Crustacea, Decapoda): Studi e  
1888 Ricerche, Associazione Amici del Museo—Museo Civico “G. Zannato”(Montecchio  
1889 Maggiore), v. 2002, p. 7–28.
- 1890 Beschin, C., Busulini, A., De Angeli, A., and Tessier, G., 2007, I decapodi dell'Eocene inferiore di  
1891 Contrada Gecchelina (Vicenza, Italia settentrionale) (Anomura e Brachyura): Museo di  
1892 archeologia e scienze naturali G. Zannato, p. 1–84.
- 1893 Beschin, C., De Angeli, A., and Zorzin, R., 2009, Crostacei fossili del Veneto: una inedita fauna  
1894 eocenica dei Lessini orientali (Monte Serea di San Giovanni Ilarione, Verona), con  
1895 descrizione di tre nuove specie: Bollettino del Museo civico di Storia naturale di Verona, v.  
1896 33, p. 59–83.
- 1897 Beschin, C., and De Angeli, A., 2011, *Baldoplax bonizzato* gen. nov., sp. nov., (Crustacea,  
1898 Decapoda, Euryplacidae) dell'Eocene di Ferrara di Monte Baldo (Verona, Italia  
1899 settentrionale): Studi e Ricerche - Associazione Amici del Museo- Museo Civico "G.  
1900 Zannato", v. 18, p. 5–10.



- 1901 Beschin, C., Busulini, A., and Tessier, g., 2013, Crostacei medio-eocenici della "Pietra di Nanto"  
1902 (Monti Berici, Vicenza- Italia settentrionale): Lavori-Società Veneziana di Scienze Naturali,  
1903 v. 38, p. 111–146.
- 1904 Beschin, C., Busulini, A., and Tessier, G., 2015, Nuova segnalazione di crostacei associati a coralli  
1905 nell'Eocene inferiore dei Lessini orientali (Vestenanova–Verona): Lavori Società veneziana  
1906 di Scienze naturali, v. 40, p. 47–109.
- 1907 Beschin, C., Busulini, A., Tessier, G., and Zorzin, R., 2016a, I crostacei associati a coralli  
1908 nell'Eocene inferiore dell'area di Bolca: Verona e Vicenza, Italia nordorientale, Memorie del  
1909 Museo civico di storia naturale di Verona, 189 p.:
- 1910 Beschin, C., De Angeli, A., Checchi, A., and Zarantonello, G., 2016b, Crostacei Decapodi del" tufo  
1911 a *Lophoranina*"(Luteziano inferiore) della Valle del Chiampo (Vicenza, Italia nordorientale),  
1912 Montecchio Maggiore (Vicenza), Museo di Archeologia e Scienze Naturali" G. Zannato", 92  
1913 p.:
- 1914 Beschin, C., Busulini, A., Fornaciari, E., Papazzoni, C. A., and Tessier, G., 2018, La fauna di  
1915 crostacei associati a coralli dell'Eocen Superiore di Campolongo di Val Liona (Monti Berici,  
1916 Vicenza, Italia Nordorientale): Bolletino del Museo di Storia Naturale di Venezia, v. 69, p.  
1917 129–215.
- 1918 Beschin, C., Busulini, A., Tessier, G., and Zorzin, R., 2019, La fauna di crostacei dell'Eocene  
1919 superiore di Parona di Verona (Italia nordorientale): nuovi ritrovamenti: Bollettino del  
1920 Museo di Storia Naturale di Venezia, v. 70, p. 71–142.
- 1921 Betancort, J. F., Lomoschitz Mora-Figueroa, A., and Meco, J., 2014, Mio-Pliocene crustaceans from  
1922 the Canary Islands, Spain: Rivista Italiana di paleontologia e Stratigrafia, v. 120, no. 3, p.  
1923 337–349.
- 1924 Beurlen, K., 1958, Contribuição à paleontologia do estado do Para: Crustáceos Decápodos da  
1925 Formação Pirabas: Boletim do Museu Paraense Emilio Goeldi, (nova série) (Geologia), v. 5,  
1926 p. 1–48.
- 1927 Bishop, G. A., and Williams, A. B., 2000, Fossil crabs from tepee buttes, submarine seeps of the late  
1928 Cretaceous Pierre Shale, South Dakota and Colorado, USA: Journal of Crustacean Biology,  
1929 v. 20, no. 5, p. 286-300.
- 1930 Bittner, A., 1893, Decapoden des pannonischen Tertiärs: Sitzungsberichte der kaiserlichen  
1931 Akademie der Wissenschaften in Wien, v. 102, p. 10–37.

- 1932 Blow, W. C., and Manning, R. B., 1996, Preliminary descriptions of 25 new decapod crustaceans  
1933 from the middle Eocene of the Carolinas, U.S.A.: Tulane Studies in Geology and  
1934 Paleontology, v. 29, no. 1, p. 1–26.
- 1935 Blow, W. H., Late Middle Eocene to Recent planktonic foraminiferal biostratigraphy, *in*  
1936 Proceedings Proceedings of the first international conference on planktonic microfossils  
1937 (Geneva, 1967)1969, Volume 1, Leiden, EJ Brill, p. 199–422.
- 1938 Boucot, A. J., and Poinar Jr, G. O., 2010, Fossil Behavior Compendium, Boca Raton, CRC Press.
- 1939 Brito, I. M., 1972, Contribuição ao Conhecimento dos Crustáceos Decápodos da Formação Pirabas.  
1940 II — O Gênero *Uca* (Brachyura-Ocypodidae): Anais da Academia Brasileira de Ciências, v.  
1941 44, no. 1, p. 95–98.
- 1942 Buchs, D. M., Irving, D., Coombs, H., Miranda, R., Wang, J., Coronado, M., Arrocha, R., Lacerda,  
1943 M., Goff, C., and Almengor, E., 2019, Volcanic contribution to emergence of Central  
1944 Panama in the Early Miocene: Scientific reports, v. 9, no. 1, p. 1-16.
- 1945 Busulini, A., Tessier, G., Beschin, C., and De Angeli, A., 2003, *Boschetti* *giampietroi*, nuovo  
1946 genere e specie di Portunidae (Crustacea, Decapoda) dell’Eocene medio della Valle del  
1947 Chiampo (Vicenza, Italia settentrionale): Studi e Ricerche—Associazione Amici del Museo—  
1948 Museo civico “G. Zannato”—Montecchio Maggiore (Vicenza), p. 13–18.
- 1949 Busulini, A., Tessier, G., and Beschin, C., 2006, The genus *Phlyctenodes* Milne Edwards, 1862  
1950 (Crustacea: Decapoda: Xanthidae) in the Eocene of Europe: Revista mexicana de ciencias  
1951 geológicas, v. 23, no. 3, p. 350–360.
- 1952 Cahuzac, B., and Poignant, A., 1997, Essai de biozonation de l’Oligo-Miocène dans les bassins  
1953 européens à l’aide des grands foraminifères néritiques: Bulletin de la Société géologique de  
1954 France, v. 168, no. 2, p. 155–169.
- 1955 Cahuzac, B., and Londeix, L., 2012, Biostratigraphie appliquée à l’étage Aquitaniien [Contribution à  
1956 la connaissance de l’étage Aquitaniien, n° 8] Bulletin de la Société Linnéenne de Bordeaux,  
1957 no. 2, p. 213–226.
- 1958 Carreño, A. L., and Cronin, T. M., 1993, Middle Eocene Ostracoda from Baja California Sur,  
1959 Mexico: Journal of Micropalaeontology, v. 12, no. 2, p. 141–153.
- 1960 Casadio, S., Parras, A., Marensi, S., and Griffin, M., 2001, Edades  $^{87}\text{Sr}/^{86}\text{Sr}$  de *Crassostrea*?  
1961 *hatcheri* Ortmann (Bivalvia, Ostreoidea) en el “Patagoniano” de Santa Cruz, Argentina,  
1962 Reunión de Comunicaciones de la Asociación Paleontológica Argentina. 29–30 de  
1963 noviembre, 2001, Volume 38, Ameghiniana, Suplemento, p. 30R.

- 1964 Casadío, S., Guerstein, G., Marensi, S., Santillana, S., Feldmann, R., Parras, A., and Montalvo, C.,  
1965 2000, Evidencias para una edad oligocena de la Formación Centinela, suroeste de Santa  
1966 Cruz, Argentina: Ameghiniana, v. 37, no. 4, p. 71R.
- 1967 Casadío, S., De Angeli, A., Feldmann, R. M., Garassino, A., Hetler, J. L., Parras, A., and  
1968 Schweitzer, C. E., 2004, New decapod crustaceans (Thalassinidea, Galatheaidea, Brachyura)  
1969 from the middle Oligocene of Patagonia, Argentina: Annals of Carnegie Museum, v. 73, p.  
1970 25–47.
- 1971 Casadío, S., Feldmann, R. M., Parras, A., and Schweitzer, C. E., 2005, Miocene fossil Decapoda  
1972 (Crustacea: Brachyura) from Patagonia, Argentina, and their paleoecological setting: Annals  
1973 of Carnegie Museum, v. 74, no. 3, p. 151–188.
- 1974 Casanovas-Vilar, I., DeMiguel, D., Galindo, J., Robles, J. M., Garcés, M., and Cabrera, L., 2011,  
1975 The continental Burdigalian (Early Miocene) of the Vallès-Penedès Basin (Catalonia, Spain),  
1976 in Pérez-García, A., Gascó, F., Gasulla, J. M., and Escaso, F., eds., Viajando a Mundos  
1977 Pretéritos: Morella, Ayuntamiento de Morella, p. 93–100.
- 1978 Casanovas-Vilar, I., Madern, A., Alba, D. M., Cabrera, L., García-Paredes, I., Van den Hoek  
1979 Ostende, L. W., DeMiguel, D., Robles, J. M., Furió, M., and van Dam, J., 2016, The  
1980 Miocene mammal record of the Vallès-Penedès Basin (Catalonia): Comptes Rendus Palevol,  
1981 v. 15, no. 7, p. 791–812.
- 1982 Castro, P., Ng, P. K., and Ahyong, S. T., 2004, Phylogeny and systematics of the Trapeziidae Miers,  
1983 1886 (Crustacea: Brachyura), with the description of a new family: Zootaxa, v. 643, no. 1, p.  
1984 1–70.
- 1985 Castro, P., Guinot, D., and Ng, P. K. L., 2010, A new family for *Sotoplax robertsi* Guinot, 1984,  
1986 with a diagnosis and key to the Goneplacoidea MacLeay, 1838 (Crustacea: Decapoda:  
1987 Brachyura): Zootaxa, v. 2356, no. 1, p. 36–56.
- 1988 Castro, P., and Ng, P. K. L., 2010, Revision of the family Euryplacidae Stimpson, 1871 (Crustacea:  
1989 Decapoda: Brachyura: Goneplacoidea): Zootaxa, v. 2375, p. 1–130.
- 1990 Ceccon, L., and De Angeli, A., 2019, Un nuovo costaceo Percnidae dell’Oligocene di Sant’Urbano,  
1991 Vicenza, Italia settentrionale: Bolletino del Museo Civico di Storia Naturale di Verona, v.  
1992 43, p. 17–22.
- 1993 Charbonnier, S., Garassino, A., Pasini, G., Métais, G., Merle, D., Bartolini, A., Brohi, I. A., Solangi,  
1994 S. H., Lashari, R. A., Welcomme, J.-L., and Marivaux, L., 2013, Early Paleogene decapod

- 1995 crustaceans from the Sulaiman and Kirthar Ranges, Pakistan: Annales de Paléontologie, v.
- 1996 99, no. 2, p. 101-117.
- 1997 Chen, J., Xing, Y., Yao, W., Xu, X., Zhang, C., Zhang, Z., and Liu, Q., 2019, Phylomitogenomics
- 1998 reconfirm the phylogenetic position of the genus *Metaplex* inferred from the two grapsid
- 1999 crabs (Decapoda: Brachyura: Grapsoidea): Plos one, v. 14, no. 1, p. e0210763.
- 2000 Choffat, P. L., 1898, Recueil d'études paléontologiques sur la Faune Crétacique du Portugal, II
- 2001 Section des Travaux Géologiques du Portugal, Lisbonne, p. 45.
- 2002 Cohen, K. M., Finney, S. C., Gibbard, P. L., and Fan, J.-X., 2013; updated 2023, The ICS
- 2003 International Chronostratigraphic Chart: Episodes, v. 36, p. 199–204.
- 2004 Collins, J. S. H., and Morris, S. F., 1978, New Lower Tertiary crabs from Pakistan: Palaeontology,
- 2005 v. 21, p. 957-981.
- 2006 Collins, J. S. H., and Donovan, S. K., 1997, Some new crab records (Crustacea: Decapoda) from the
- 2007 late Pleistocene Port Morant Formation of southeast Jamaica: Bulletin of the Mizunami
- 2008 Fossil Museum, v. 24, no. (for 1997), p. 73–77.
- 2009 Collins, J. S. H., and Jakobsen, S. L., 2003, New crabs (Crustacea, Decapoda) from the Eocene
- 2010 (Ypresian/Lutetian) Lillebælt Clay Formation of Jutland, Denmark: Bulletin of the
- 2011 Mizunami Fossil Museum, v. 30, p. 63–96.
- 2012 Collins, J. S. H., Lee, C., and Noad, J., 2003, Miocene and Pleistocene crabs (Crustacea, Decapoda)
- 2013 from Sabah and Sarawak: Journal of Systematic Palaeontology, v. 1, no. 3, p. 187–226.
- 2014 Collins, J. S. H., Mitchell, S. F., and Donovan, S. K., 2009, A new species of land crab, *Sesarma*
- 2015 Say , 1817(Decapoda, Brachyura), from the Pleistocene of Jamaica: Scripta Geologica, v.
- 2016 138.
- 2017 Collins, J. S. H., and Donovan, S. K., 2012, Pleistocene decapod crustaceans of eastern Jamaica:
- 2018 Caribbean Journal of Science, v. 46, p. 133–142.
- 2019 Colosi, G., 1924, Una specie fossile de Gerionide (Decapodi brachiuri): Bolettino della Società dei
- 2020 Naturalisti in Napoli, Series 2, v. 15 (for 1923), no. 35, p. 248–255.
- 2021 Cotton, L., Rivero-Cuesta, L., Franceschetti, G., Monechi, S., Iakovleva, A., Alegret, L., Dinares-
- 2022 Turell, J., Hooker, J., King, C., and Fluegeman, R., 2021, Reassessing the Bartonian unit
- 2023 stratotype at Alum Bay (Isle of Wight, UK): an integrated approach: Newsletters on
- 2024 Stratigraphy, v. 54, no. 1, p. 17–42.

- 2025 Crame, J. A., Beu, A. G., Ineson, J. R., Francis, J. E., Whittle, R. J., and Bowman, V. C., 2014, The  
2026 early origin of the Antarctic marine fauna and its evolutionary implications: PloS one, v. 9,  
2027 no. 12, p. e114743.
- 2028 De Angeli, A., and Beschin, C., 1998, *Cerionnectes*, nuovo genere di brachyuro dell'Eocene di  
2029 Ungheria e Italia: Lavori Società Veneziana di Scienze Naturali, v. 23, p. 87–91.
- 2030 De Angeli, A., Garassino, A., and Pasini, G., 2009, New reports of anomurans and brachyurans from  
2031 the Cenozoic of Tuscany (Italy): Atti della Società italiana di scienze naturali e del museo  
2032 civico di storia naturale di Milano, v. 150, no. 2, p. 163–196.
- 2033 De Angeli, A., Garassino, A., and Alberti, R., 2010a, *Eogarthambrus guinotae* n. gen. and n.  
2034 sp.(Decapoda, Brachyura, Parthenopidae) from the Eocene of Vicenza, Italy, Studies on  
2035 Brachyura: a homage to Danièle Guinot, Brill, p. 107–116.
- 2036 De Angeli, A., Garassino, A., and Ceccon, L., 2010b, New report of the coral-associated decapods  
2037 from the “Formazione di Castelvetro” (early Oligocene) (Vicenza, NE Italy): Atti della  
2038 Società italiana di Scienze naturali e del Museo civico di Storia naturale in Milano, v. 151,  
2039 no. 2, p. 145–177.
- 2040 De Angeli, A., and Ceccon, L., 2012, *Eouropytychus montemagrensis* n. gen., n. sp. (Crustacea,  
2041 Decapoda, Anomura, Chirostylidae) dell'Eocene inferiore (Ypresiano) di Monte Magrè  
2042 (Vicenza, Italia settentrionale): Lavori Società veneziana di Scienze naturali, v. 37, p. 19–24.
- 2043 De Angeli, A., and Ceccon, L., 2013, Tetraliidae and Trapeziidae (Crustacea, Decapoda, Brachyura)  
2044 from the Early Eocene of Monte Magrè (Vicenza, NE Italy): Natural History Sciences, v.  
2045 154, no. 1, p. 25–40.
- 2046 De Angeli, A., and Ceccon, L., 2014, Nuovi Brachyura (Decapoda) dell'Eocene inferiore di Monte  
2047 Magrè (Vicenza, Italia settentrionale): Lavori Società veneziana di Scienze naturali, v. 39, p.  
2048 77–92.
- 2049 De Angeli, A., and Ceccon, L., 2015, Nuovi crostacei Brachyura dell'Eocene di Monte Magrè  
2050 (Vicenza, Italia settentrionale): Lavori Società veneziana di Scienze naturali, v. 40, p. 119–  
2051 138.
- 2052 De Angeli, A., 2016, Nuovi crostacei Cyonomidae (Decapoda: Brachyura) dell'Eocene dei Monti  
2053 Berici (Vicenza, Italia settentrionale): Studi Trentini di Scienze Naturali, v. 95, p. 25–32.
- 2054 De Angeli, A., and Alberti, R., 2016, *Tethyscarpilus bericus* n. gen., n. sp.(Decapoda, Brachyura,  
2055 Carpilidae) dell'Eocene superiore dei Monti Berici (Vicenza, Italia settentrionale): Lavori  
2056 Società Veneziana di Scienze Naturali, v. 41, p. 121–128.

- 2057 De Angeli, A., and Caporiondo, F., 2016, Un nuovo Parthenopidae (Crustacea, Decapoda,  
2058 Brachyura) dell'Eocene inferiore dei Monti Lessini orientali (Verona– Italia settentrionale):  
2059 Lavori Società veneziana di Scienze naturali, v. 41, p. 137–144.
- 2060 De Angeli, A., and Ceccon, L., 2017, Contributo ai crostacei decapodi dell'Eocene inferiore dei  
2061 Monti Lessini orientali (Italia nordorientale): Natura Vicentina, v. 20, no. 2016, p. 5–38.
- 2062 De Angeli, A., and Caporiondo, F., 2019, *Alontecarcinus buratoi* n. gen., n. sp. (Decapoda,  
2063 Brachyura, Potamonidae) un nuovo crostaceo d'acqua dolce dell'Eocene (Bartoniano) di  
2064 Alonte (Monti Berici, Vicenza, Italia settentrionale): Bollettino del Museo Civico di Storia  
2065 Naturale di Verona, v. 43, no. 2019 Geologia Paleontologia Preistoria, p. 5–16.
- 2066 De Angeli, A., and Garassino, A., 2021a, Report of ethusid crabs (Brachyura, Ethusidae) from the  
2067 late Eocene of San Francisco hill (Monti Berici, Vicenza, NW Italy): Neues Jahrbuch fuer  
2068 Geologie und Palaeontologie. Abhandlungen, v. 301, no. 1, p. 17–23.
- 2069 De Angeli, A., and Garassino, A., 2021b, New report of fossil crabs (Decapoda, Brachyura) from  
2070 the late Eocene of San Feliciano Hill (Orgiano, Monti Berici, Vicenza, NE Italy): Boletín de  
2071 la Sociedad Geológica Mexicana, v. 73, no. 3, p. A120221.
- 2072 De Angeli, A., 2023, Nuovi crostacei decapodi dell'Eocene superiore dei Monti Berici (Vicenza,  
2073 Italia nordorientale): Lavori - Società Veneziana di Scienze Naturali, v. 48, p. 169 –186.
- 2074 de Bouillé, R., Paléontologie de Biarritz, in Proceedings Compte Rendu Travaux Congrès  
2075 Scientifique de France, 39e session, Pau1873, p. 11, pl. 14.
- 2076 de Gibert, J. M., and Robles, J. M., 2005, Firmground ichnofacies recording high-frequency marine  
2077 flooding events (Langhian transgression, Vallès-Penedès Basin, Spain): Geologica Acta, v.  
2078 3, no. 3, p. 295–305.
- 2079 de Gibert, J. M., Muñiz, F., Belaústegui, Z., and Hyžný, M., 2013, Fossil and modern fiddler crabs  
2080 (*Uca tangeri*: Ocypodidae) and their burrows from SW Spain: ichnologic and biogeographic  
2081 implications: Journal of Crustacean Biology, v. 33, no. 4, p. 537–551.
- 2082 De Grave, S., Pentcheff, N. D., Ahyong, S. T., Chan, T. Y., Crandall, K. A., Dworschak, P. C.,  
2083 Felder, D. L., Feldmann, R. M., Fransen, C. H. J. M., Goulding, L. Y. D., Lemaitre, R., Low,  
2084 M. E. Y., Martin, J. W., Ng, P. K. L., Schweitzer, C. E., Tan, S. H., Tshudy, D., and Wetzer,  
2085 R., 2009, A classification of recent and fossil genera of decapod crustaceans.: The Raffles  
2086 Bulletin of Zoology Supplement, v. 21, p. 1–109.
- 2087 De Haan, W., 1833-1850, Crustacea, in Siebold, P. F. v., ed., Fauna Japonica sive Descriptio  
2088 Animalium, Quae in Itinere per Japoniam, Jussu et Auspiciis Superiorum, qui Summum in



- 2089 India Batava Imperium Tenent, Suscepto, Annis 1823–1830 Collegit, Notis, Observationibus  
2090 et Adumbrationibus Illustravit: Leiden, Lugduni-Batavorum, p. i-xvii, i-xxxi, ix-xvi, 1–243,  
2091 pls. A–J, L–Q, 241–255, table 242.
- 2092 del Rio, C. J., Concheyro, A., and Martinez, S. A., 2011, The Maastrichtian–Danian at General Roca  
2093 (Patagonia, Argentina): a reappraisal of the chronostratigraphy and biostratigraphy of a type  
2094 locality: Neues Jahrbuch für Geologie und Paläontologie - Abhandlungen, v. 259, no. 2, p.  
2095 129–156.
- 2096 Desmarest, A. G., 1822, Les crustacés proprement dits, in Brongniart, A., and Desmarest, A. G.,  
2097 eds., Histoire naturelle des crustacés fossiles: Paris, F.-G. Levrault, p. 67–154.
- 2098 Desmarest, A. G., 1823, Malacostracés, Malacostraca. (Crust.), in Cuvier, F., ed., Dictionnaire des  
2099 Sciences Naturelles, dans lequel on trait Méthodiquement des Différens êtres de la Nature,  
2100 considérés soit en eux-mêmes, d’après l’état actuel de nos connoissances, soit relativement a  
2101 l’utilité qu’en peuvent retirer la Médecine, l’Agriculture, le Commerce et les Arts. Suivi  
2102 d’une biographie des plus Célèbres Naturalistes. Ouvrage destiné aux médecins, aux  
2103 agriculteurs, aux commerçans, aux artistes, aux manufacturiers, et à tous ceux qui ont intérêt  
2104 à connoître les productions de la nature, leurs caractères génériques et spécifiques, leur lieu  
2105 natal, leurs propriétés et leurs usages, Volume 28: Strasbourg et Paris, F.G. Levrault et Le  
2106 Normant, p. 138–425.
- 2107 Domínguez Alonso, P., 2008, Nuevo cangrejo violinista (género *Uca*, Ocypodidae) en el Plio-  
2108 Pleistoceno del litoral pacífico de Honduras: Ameghiniana, v. 45, no. 4, p. 663–676.
- 2109 Duan, X., Dong, X., Li, J., Lü, J., Guo, B., Xu, K., and Ye, Y., 2022, The complete mitochondrial  
2110 genome of *Pilumnopus makianus* (Brachyura: Pilumnidae), novel gene rearrangements, and  
2111 phylogenetic relationships of Brachyura: Genes, v. 13, no. 11, p. 1943.
- 2112 Dutton, A. L., Lohmann, K. C., and Zinsmeister, W. J., 2002, Stable isotope and minor element  
2113 proxies for Eocene climate of Seymour Island, Antarctica: Paleoceanography, v. 17, no. 2, p.  
2114 6-1–6-13.
- 2115 Etayo-Serna, F., 1979, Zonation of the Cretaceous of central Colombia by ammonites, Bogotá,  
2116 Colombia, Ministerio de Minas y Energia, Instituto Nacional de Investigaciones Geológico-  
2117 Mineras, 186 p.:
- 2118 Evans, N., 2018, Molecular phylogenetics of swimming crabs (Portunoidea Rafinesque, 1815)  
2119 supports a revised family-level classification and suggests a single derived origin of  
2120 symbiotic taxa: PeerJ, 6, p. e4260.

- 2121 Eydoux, F., 1835, Nouvelle espèce de *Gélasime*: Magasin de Zoologie, v. 5, no. 7, p. 29–32.
- 2122 Fabricius, J., 1781, Species insectorum exhibentes eorum differentias specificas, sryonrya auctorum,
- 2123 loca natalia, rnetarnorphosis adjectis obseruationibus, descriptionibus, Hamburg and
- 2124 Cologne, Ernest Bohnii, 552 p.:
- 2125 Fabricius, J., 1798, Supplementatum Entomologiae systematicae, Hafniae, Proft et Storch, 572 p.:
- 2126 Farris, D. W., Cardona, A., Montes, C., Foster, D., and Jaramillo, C., 2017, Magmatic evolution of
- 2127 Panama Canal volcanic rocks: A record of arc processes and tectonic change: PloS one, v.
- 2128 12, no. 5, p. e0176010.
- 2129 Feldmann, R. M., and Wilson, M. T., 1988, Eocene decapod crustaceans from Antarctica:
- 2130 Geological Society of America Memoir, v. 169, p. 465–488.
- 2131 Feldmann, R. M., and Maxwell, P. A., 1990, Late Eocene decapod Crustacea from North Westland,
- 2132 South Island, New Zealand: Journal of Paleontology, v. 64, no. 5, p. 779–797.
- 2133 Feldmann, R. M., 1993, Additions to the fossil decapod crustacean fauna of New Zealand: New
- 2134 Zealand Journal of Geology and Geophysics, v. 36, no. 2, p. 201-211.
- 2135 Feldmann, R. M., 1994, *Antarctomithrax thomsoni*, a new genus and species of crab (Brachyura;
- 2136 Majidae) from the La Meseta Formation (Eocene) of Seymour Island, Antarctica: Journal of
- 2137 Paleontology, v. 68, no. 1, p. 174–176.
- 2138 Feldmann, R. M., Casadío, S., Chirino-Galvez, L., and Aguirre-Urreta, M., 1995, Fossil decapod
- 2139 crustaceans from the Jagüel and Roca formations (Maastrichtian–Danian) of the Neuquén
- 2140 Basin, Argentina: Journal of Paleontology, v. 69, no. S43, p. 1-22.
- 2141 Feldmann, R. M., Bice, K. L., Hopkins, C. S., Salva, E. W., and Pickford, K., 1998, Decapod
- 2142 crustaceans from the Eocene Castle Hayne Formation, North Carolina: Paleoceanographic
- 2143 implications: Memoir (The Paleontological Society), v. 48, p. 1–28.
- 2144 Feldmann, R. M., Schweitzer, C. E., and Encinas, A., 2005, New decapods from the Navidad
- 2145 Formation (Miocene) of Chile: Journal of Crustacean Biology, v. 25, p. 427–449.
- 2146 Feldmann, R. M., and Schweitzer, C. E., 2009, Revision of Jurassic Homoloidea De Haan, 1839,
- 2147 from the Ernstbrunn and Štramberg limestones, Austria and the Czech Republic: Annalen
- 2148 des Naturhistorischen Museums in Wien. Serie A für Mineralogie und Petrographie,
- 2149 Geologie und Paläontologie, Anthropologie und Prähistorie, p. 183-205.
- 2150 Feldmann, R. M., Schweitzer, C. E., and Encinas, A., 2010, Neogene decapod Crustacea from
- 2151 Southern Chile: Annals of Carnegie Museum v. 78, no. 4, p. 337–366.



- 2152 Feldmann, R. M., Schweitzer, C. E., Bennett, O., Franescu, O. D., Resar, N., and Trudeau, A.,  
2153 2011a, New Eocene Brachyura (Crustacea: Decapoda) from Egypt: Neues Jahrbuch für  
2154 Geologie und Paläontologie-Abhandlungen, v. 262, no. 3, p. 1–31.
- 2155 Feldmann, R. M., Schweitzer, C. E., Casadío, S., and Griffin, M., 2011b, New Miocene Decapoda  
2156 (Thalassinidea; Brachyura) from Tierra del Fuego, Argentina: Paleobiogeographic  
2157 implications: Annals of the Carnegie Museum, v. 79, no. 2, p. 91–123.
- 2158 Feldmann, R. M., Schweitzer, C. E., and Karasawa, H., 2012, Part R, Revised, Volume 1, Chapter  
2159 8M: Systematic Descriptions: Infraorder Brachyura, Section Homoloida: Treatise Online, v.  
2160 52, p. 1–12.
- 2161 Feldmann, R. M., and Schweitzer, C. E., 2019, Earliest known sponge crab (Brachyura: Dromiidae)  
2162 from the Upper Cretaceous Wenonah Formation, New Jersey, USA: Bulletin of the  
2163 Mizunami Fossil Museum, v. 45, p. 1-6.
- 2164 Feldmann, R. M., Schweitzer, C. E., and Phillips, G., 2019, Paleogene Decapoda (Caridea,  
2165 Anomura, Axiidea, Brachyura) from Alabama and Mississippi, USA: Journal of Crustacean  
2166 Biology, v. 39, no. 3, p. 279–302.
- 2167 Ferratges, F. A., Zamora, S., and Aurell, M., 2019, A new genus and species of Parthenopidae  
2168 MacLeay, 1838 (Decapoda: Brachyura) from the lower Eocene of Spain: Journal of  
2169 Crustacean Biology, v. 39, no. 3, p. 303-311.
- 2170 Ferratges, F. A., Luque, J., Dominguez, J. L., Ossó, À., Aurell, M., and Zamora, S., 2023, The oldest  
2171 dairoidid crab (Decapoda: Brachyura: Parthenopoidea) from the Eocene of Spain: Papers in  
2172 Palaeontology, v. 9, no. 3, p. e1494.
- 2173 Fleming, C. A., 1981, A new grapsid crab from the upper Miocene of New Zealand: Journal of the  
2174 Royal Society of New Zealand, v. 11, no. 2, p. 103-108.
- 2175 Forir, H., 1887, Contributions à l'étude du système crétacé de la Belgique. II. Études  
2176 complémentaires sur les crustacés: Annales de la Société géologique de Belgique, v. 14, p.  
2177 155-175.
- 2178 Forskal, P., 1775, Descriptiones Animalium, Avium, Amphibiorum, Piscium, Insectorum, Vermium,  
2179 quae in itinere orientali observavit Petrus Forskal. Post mortem auct. ed. C. Niebuhr: Hafniae  
2180 (= Copenhagen), ex officina Mölleri.
- 2181 Förster, R., and Mundlos, R., 1982, Krebse aus dem Alttertiär von Helmstedt und Handorf  
2182 (Niedersachsen): Palaeontographica (A), v. 179, p. 148–184.

- 2183 Förster, R., 1986, Der erste Nachweis eines brachyuren Krebses aus dem Lias (Oberes Pliensbach)
- 2184 Mitteleuropas: Mitteilungen der Bayerischen Staatssammlung für Paläontologie und
- 2185 Historische Geologie, v. 26, p. 25–31.
- 2186 Fraaije, R. H., Robins, C., van Bakel, B. W., Jagt, J. W., and Bachmayer, F., 2019, Paguroid
- 2187 anomurans from the Tithonian Ernstbrunn Limestone, Austria—the most diverse extinct
- 2188 paguroid assemblage on record: Annalen des Naturhistorischen Museums in Wien. Serie A
- 2189 für Mineralogie und Petrographie, Geologie und Paläontologie, Anthropologie und
- 2190 Prähistorie, v. 121, p. 257-290.
- 2191 Francescone, F., Lauretano, V., Bouligand, C., Moretti, M., Sabatino, N., Schrader, C., Catanzariti,
- 2192 R., Hilgen, F., Lanci, L., and Turtù, A., 2019, A 9 million-year-long astrochronological
- 2193 record of the early–middle Eocene corroborated by seafloor spreading rates: Bulletin, v. 131,
- 2194 no. 3–4, p. 499–520.
- 2195 Frantescu, O., Feldmann, R. M., and Schweitzer, C. E., 2016, Cretaceous fossil Raninoida De Haan,
- 2196 1839 (Crustacea, Decapoda, Brachyura) from northeast Texas: Journal of Paleontology, v.
- 2197 90, no. 6, p. 1118–1132.
- 2198 Gandolfo, M. A., Nixon, K. C., and Crepet, W. L., 2008, Selection of Fossils for Calibration of
- 2199 Molecular Dating Models1: Annals of the Missouri Botanical Garden, v. 95, no. 1, p. 34-42.
- 2200 Garassino, A., Artal, P., and Pasini, G., 2009, *Upogebia miocenica* n. sp.(Crustacea, Thalassinidea,
- 2201 Upogebiidae) from the Miocene of Catalonia (Spain): Atti della Società italiana di Scienze
- 2202 naturali e del Museo civico di Storia naturale di Milano, v. 150, no. 1, p. 61–68.
- 2203 Gatt, M., and De Angeli, A., 2010, A new coral-associated decapod assemblage from the Upper
- 2204 Miocene (Messinian) Upper Coralline Limestone of Malta (Central Mediterranean):
- 2205 Palaeontology, v. 53, no. 6, p. 1315–1348.
- 2206 Glaessner, M. F., 1933, I.—New tertiary crabs in the collection of the British Museum: Journal of
- 2207 Natural History Series 10, v. 12, no. 67, p. 1-28.
- 2208 Glaessner, M. F., 1969, Decapoda, *in* (ed.), R. C. M., ed., Treatise on Invertebrate Paleontology.
- 2209 Part R. Arthropoda, Volume 4(2): Geological Society of America and University of Kansas
- 2210 Press, Lawrence, p. R399-R651.
- 2211 Gomes, B. T., Aguilera, O., da Silva-Caminha, S. A. F., D'Apolito, C., Cárdenas, D., Hocking, E. P.,
- 2212 and Lemes, K. K. B., 2023, Biostratigraphy and Paleoenvironments of the Pirabas Formation
- 2213 (Neogene, Pará State-Brazil): Marine Micropaleontology, p. 102218.

- 2214 Gozhyk, P., Semenenko, V., Andreeva-Grigorovich, A., and Maslun, N., 2015, The correlation of  
2215 the Neogene of Central and Eastern Paratethys segments of Ukraine with the International  
2216 Stratigraphic Chart based on planktonic microfossils: *Geologica Carpathica*, v. 66, no. 3, p.  
2217 235–244.
- 2218 Grimaldi, D. A., 1996, *Amber: Window to the Past*, American Museum of Natural History, New  
2219 York.
- 2220 Guerstein, G., Guler, M., and Casadío, S., 2004, Palynostratigraphy and palaeoenvironments across  
2221 the Oligocene–Miocene boundary within the Centinela Formation, southwestern Argentina:  
2222 Geological Society, London, Special Publications, v. 230, no. 1, p. 325–343.
- 2223 Guinot, D., 1977, Propositions pour une nouvelle classification des Crustacés Décapodes  
2224 Brachyours: *Comptes rendus hebdomadaires des séances de l'Académie des sciences*, v.  
2225 285, no. Série D, p. 1049–1052.
- 2226 Guinot, D., Charbot-Chanona, G., and Vega, F. J., 2019, *Archaeochiapasidae* n. fam., a new early  
2227 Cenomanian brachyuran family from Chiapas, Mexico, new hypothesis on *Lecythocaridae*  
2228 Schweitzer & Feldmann, 2009, and phylogenetic implications (Crustacea, Decapoda,  
2229 Brachyura, Eubrachyura): *Geodiversitas*, v. 41, no. 7, p. 285–322.
- 2230 Guinot, D., 2023, A new subfamily classification of the highly diversified Dorippidae H. Milne  
2231 Edwards, 1837 (Crustacea, Decapoda, Brachyura, Dorippoidea), using morphological,  
2232 molecular and palaeontological data, with special emphasis on its unique female  
2233 reproductive system: *Zoosystema*, v. 45, no. 9, p. 225–372.
- 2234 Hartnoll, R. G., 1971, *Sesarma cookei* n. sp., a grapsid crab from Jamaica (Decapoda: Brachyura):  
2235 *Crustaceana*, v. 20, p. 257–262.
- 2236 Hartzell, S. M., Schweitzer, C. E., and Feldmann, R. M., 2022, Extinction and survival of raninoid  
2237 crabs (Decapoda: Brachyura: Raninoida) from the Early Cretaceous to the present: *Journal of*  
2238 *Crustacean Biology*, v. 42, no. 4, p. ruac053.
- 2239 Hegna, T. A., Luque, J., and Wolfe, J. M., 2020, The fossil record of the Pancrustacea, *in* Poore, G.,  
2240 and Thiel, M., eds., *The Natural History of the Crustacea: Evolution and Biogeography of*  
2241 *the Crustacea*, Volume 8, Volume 8, Oxford University Press, p. 21–52.
- 2242 Herbst, J. F. W., 1782–1804, *Versuch einer Naturgeschichte der Krabben und Krebse, nebst einer*  
2243 *systematischen Beschreibung ihrer verschiedenen Arten*, Strals und GA Lange, 515 p.:
- 2244 Hohenegger, J., Coric, S., and Wägrich, M., 2014, Timing of the middle miocene Badenian stage of  
2245 the central Paratethys: *Geologica Carpathica*, v. 65, no. 1, p. 55–66.

- 2246 Hyzny, M., and Kroh, A., 2015, Barremian decapod crustaceans from Serre de Bleyton (Drôme, SE  
2247 France): Annalen des Naturhistorischen Museums in Wien. Serie A, Fur Mineralogie und  
2248 Petrographie, Geologie und Palaontologie, Anthropologie und Prahistorie, v. 117, p. 121.
- 2249 Hyzny, M., 2016, Diversity and distribution patterns of the Oligocene and Miocene decapod  
2250 crustaceans (Crustacea: Malacostraca) of the Western and Central Paratethys: Geologica  
2251 Carpathica, v. 67, no. 5, p. 471–494.
- 2252 Hyzny, M., and Dulai, A., 2021, Badenian decapods of Hungary, Institute de Geosciences,  
2253 University of Szeged.
- 2254 Hyzný, M., Kovalchuk, O., Świdnicka, E., Berezovsky, A., Dumitriu, S., Grădianu, I., Stefaniak, K.,  
2255 and Barkaszi, Z., 2022, Revisiting brachyuran crabs (Malacostraca: Decapoda) from  
2256 Oligocene and Miocene fish beds of Europe: Geologica Carpathica, v. 73, no. 6, p. 579–597.
- 2257 Ilyin, I. V., and Alekseev, A. S., 1998, Novye vidy krabov (Decapoda, Brachyura) iz nizhnego mela  
2258 ugo-zapadnogo Kryma: Paleontologicheskii Zhurnal, v. 1998/6, p. 46–49.
- 2259 Ilyin, I. V., 2005, Cretaceous and Paleogene decapod crustaceans of the western part of Northern  
2260 Eurasia (in Russian), Moscow, Moscow State University Press, 296 p.:
- 2261 Jagt, J. W. M., Van Bakel, B. W. M., Guinot, D., Fraaije, R. H., and Artal, P., 2015, Fossil  
2262 Brachyura, in Castro, P., Davie, P. J. F., Guinot, D., Schram, F. R., and Vaupel Klein, J. C.  
2263 v., eds., Decapoda: Brachyura (Part 2). Treatise on Zoology — Anatomy, Taxonomy,  
2264 Biology. The Crustacea, Vol. 9C-, Volume 9C-II: Leiden & Boston, Brill, p. 847–920.
- 2265 James-Williamson, S. A., and Mitchell, S. F., 2012, Revised lithostratigraphy of the Coastal Group  
2266 of south-eastern St. Thomas, Jamaica: Caribbean Journal of Earth Science, v. 44, p. 9-17.
- 2267 Janssen, A. W., and Muller, P., 1984, Miocene Decapoda and Mollusca from Ramsel (province of  
2268 Antwerpen, Belgium), with a new crab genus and a new cephalopod species: Scripta  
2269 Geologica, v. 75, p. 1–26.
- 2270 Jaramillo, C. A., Rueda, M., and Torres, V., 2011, A palynological zonation for the Cenozoic of the  
2271 Llanos and Llanos Foothills of Colombia: Palynology, v. 35, no. 1, p. 46-84.
- 2272 Jaworski, E., 1938, Gasterópodos del Cretácico inferior de Colombia: Estudios geológicos y  
2273 Paleontológicos sobre la Cordillera Oriental de Colombia, v. Parte 3, p. 109–112.
- 2274 Jennings, L. A., Blakeslee, A., McCoy, K. A., Behringer, D. C., and Bojko, J., 2021, Systematic  
2275 assessment of the Panopeidae and broader Eubrachyura (Decapoda: Brachyura) using  
2276 mitochondrial genomics: Arthropod Systematics and Phylogeny, v. 79, p. 569–585.

- 2277 Karasawa, H., 1992, The crab *Ozius collinsi* sp. nov. (Xanthoidea: Decapoda: Crustacea) from the  
2278 Miocene Katsuta Group, southwest Japan: Tertiary Research, v. 14, no. 1, p. 19–24.
- 2279 Karasawa, H., 1998, *Typilobus kishimotoi*, a new leucosiid crab (Crustacea: Decapoda: Brachyura)  
2280 from the Miocene Katsuta Group, Japan: Proceedings of the Biological Society of  
2281 Washington, v. 111, no. 1, p. 97–101.
- 2282 Karasawa, H., 2000, *Medorippe tanabei*, a new species of Miocene dorippid crab (Crustacea:  
2283 Decapoda: Brachyura) from the Katsuta Group, West Honshu, Japan: Proceedings of the  
2284 Biological Society of Washington, v. 113, no. 3, p. 810–814.
- 2285 Karasawa, H., and Kato, H., 2001, The systematic status of the genus *Miosesarma* Karasawa, 1989  
2286 with a phylogenetic analysis within the family Grapsidae and a review of fossil records  
2287 (Crustacea: Decapoda: Brachyura): Paleontological Research, v. 5, no. 4, p. 259–275.
- 2288 Karasawa, H., and Kato, H., 2003, The family Goneplacidae MacLeay, 1838 (Crustacea: Decapoda:  
2289 Brachyura): Systematics, phylogeny, and fossil records: Paleontological Research, v. 7, no.  
2290 2, p. 129–151.
- 2291 Karasawa, H., and Schweitzer, C. E., 2004, Revision of the genus *Glyphithyreus* Reuss, 1859  
2292 (Crustacea, Decapoda, Brachyura, Xanthoidea) and recognition of a new genus:  
2293 Paleontological Research, v. 8, no. 3, p. 143–154.
- 2294 Karasawa, H., and Schweitzer, C. E., 2006, A new classification of the Xanthoidea sensu lato  
2295 (Crustacea: Decapoda: Brachyura) based on phylogenetic analysis and traditional  
2296 systematics and evaluation of all fossil Xanthoidea sensu lato: Contributions to Zoology, v.  
2297 75, no. 1/2, p. 23–73.
- 2298 Karasawa, H., Schweitzer, C. E., and Feldmann, R. M., 2008, Revision of the Portunoidea  
2299 Rafinesque, 1815 (Decapoda: Brachyura) with emphasis on the fossil genera and families:  
2300 Journal of Crustacean Biology, v. 28, no. 1, p. 82–127.
- 2301 Karasawa, H., Schweitzer, C. E., Feldmann, R. M., and Luque, J., 2014, Phylogeny and  
2302 classification of the Raninoidea (Decapoda: Brachyura): Journal of Crustacean Biology, v. 34,  
2303 no. 2, p. 216–272.
- 2304 Karasawa, H., Schweitzer, C. E., and Feldmann, R. M., 2019, Part R, Revised, Volume 1, Chapter  
2305 8T3: Systematic Descriptions: Superfamily Leucosioidea: Treatise Online, v. 115, p. 1–22.
- 2306 Kennedy, W., Cobban, W., Hancock, J., and Gale, A., 2005, Upper Albian and Lower Cenomanian  
2307 ammonites from the Main Street Limestone, Grayson Marl and Del Rio Clay in northeast  
2308 Texas: Cretaceous Research, v. 26, no. 3, p. 349–428.

- 2309 Kennedy, W. J., Amédro, F., Robaszynski, F., and Jagt, J. W., 2011, Ammonite faunas from  
2310 condensed Cenomanian-Turonian sections ('Tourtias') in southern Belgium and northern  
2311 France: Netherlands Journal of Geosciences, v. 90, no. 2–3, p. 209–238.
- 2312 Kirby, M. X., Jones, D. S., and MacFadden, B. J., 2008, Lower Miocene stratigraphy along the  
2313 Panama Canal and its bearing on the Central American Peninsula: PloS One, v. e2791, p. 1–  
2314 14.
- 2315 Klaus, S., Magalhães, C., Salas-Gismondi, R., Gross, M., and Antoine, P.-O., 2017, Paleogene and  
2316 Neogene brachyurans of the Amazon Basin: A revised first appearance date for primary  
2317 freshwater crabs (Crustacea, Brachyura, Trichodactylidae): Crustaceana, v. , no. Special  
2318 Issue: Volume in Honour of Michael Türkay, p. 953–967.
- 2319 Klompmaker, A. A., 2013, Extreme diversity of decapod crustaceans from the mid-Cretaceous (late  
2320 Albian) of Spain: Implications for Cretaceous decapod paleoecology: Cretaceous Research,  
2321 v. 41, p. 150-185.
- 2322 Klompmaker, A. A., Portell, R. W., Klier, A. T., Prueter, V., and Tucker, A. L., 2015, Spider crabs  
2323 of the Western Atlantic with special reference to fossil and some modern Mithracidae: PeerJ,  
2324 v. 3:e1301.
- 2325 Kocova-Veselská, M., Koci, T., and Kubajko, M., 2014, Dynomenid crabs (Decapoda, Brachyura)  
2326 and stalked barnacles (Cirripedia, Scalpelliformes) from upper Cenomanian-lower Turonian  
2327 nearshore, shallow-water strata in the Bohemian Cretaceous Basin, Czech Republic: Scripta  
2328 Geologica, v. 147, p. 49–81.
- 2329 Koh, S., and Ng, P. K., 2008, A revision of the shore crabs of the genus Eriphia (Crustacea:  
2330 Brachyura: Eriphiidae): Raffles Bulletin of Zoology, v. 56, no. 2, p. 327-355.
- 2331 Kovác, M., Halásová, E., Hudácková, N., Holcova, K., Hyzný, M., Jamrich, M., and Ruman, A.,  
2332 2018, Towards better correlation of the Central Paratethys regional time scale with the  
2333 standard geological time scale of the Miocene Epoch: Geologica Carpathica, v. 69, no. 3, p.  
2334 283–300.
- 2335 Krijgsman, W., and Piller, W. E., 2012, Central and Eastern Paratethys, in Gradstein, F. M., Ogg, J.  
2336 G., Schmitz, M. D., and Ogg, G., eds., The Geologic Time Scale 2012: Amsterdam, Elsevier,  
2337 p. 935–937.
- 2338 Lai, J. C., Ahyong, S. T., Jeng, M.-S., and Ng, P. K., 2009, Are coral-dwelling crabs monophyletic?  
2339 A phylogeny of the Trapezioidea (Crustacea: Decapoda: Brachyura): Invertebrate  
2340 Systematics, v. 23, no. 4, p. 402–408.



- 2341 Lai, J. C. Y., Mendoza, J. C. E., Guinot, D., Clark, P. F., and Ng, P. K. L., 2011, Xanthidae
- 2342 MacLeay, 1838 (Decapoda: Brachyura: Xanthoidea) systematics: A multi-gene approach
- 2343 with support from adult and zoeal morphology: Zoologischer Anzeiger - A Journal of
- 2344 Comparative Zoology, v. 250, no. 4, p. 407–448.
- 2345 Lai, J. C. Y., Thoma, B. P., Clark, P. F., Felder, D. L., and Ng, P. K., 2014, Phylogeny of eriphioid
- 2346 crabs (Brachyura, Eriphioidea) inferred from molecular and morphological studies:
- 2347 Zoologica Scripta, v. 43, no. 1, p. 52–64.
- 2348 Larghi, C., 2004, Brachyuran decapod Crustacea from the Upper Cretaceous of Lebanon: Journal of
- 2349 Paleontology, v. 78, no. 3, p. 528–541.
- 2350 Latreille, P. A., 1802, Histoire Naturelle, générale et particulière des Crustacés et des Insectes :
- 2351 Ouvrage faisant suite aux Oeuvres de Leclerc de Buffon, et Partie du Cours complet
- 2352 d'Histoire Naturelle rédigé par C. S. Sonnini, Membre de plusieurs Sociétés Savantes, Paris,
- 2353 F. Dufart, xii + 467 p.:
- 2354 Latreille, P. A., 1817, Les crustacés, les arachnides et les insectes, *in* Cuvier, G., ed., Le règne
- 2355 animal distribué d'après son organization, pour servir de base à l'histoire naturelle des
- 2356 animaux et d'introduction à l'anatomie comparée, Volume Edition 1, 3: Paris, p. xxix + 653
- 2357 pp.
- 2358 Latreille, P. A., 1825-1828, Encyclopédie méthodique, Histoire naturelle: Entomologie, ou histoire
- 2359 naturelle des crustacés, des arachnides et des insectes, Imprimerie-Libraire, Paris, Chez Mme
- 2360 veuve Agasse, v. (1, 2), 1–344 [1825]; 1345–1832 [1828] p.:
- 2361 Latreille, P. A., 1829, Crustacés, arachnides et partie des insectes. (2nd Edition), *in* Cuvier, G., ed.,
- 2362 Le règne animal distribué d'après son organisation, pour servir de base à l'histoire naturelle
- 2363 des animaux et d'introduction à l'anatomie comparée. Nouvelle édition, revue et augmentée.,
- 2364 Volume 4: Paris, Chez Déterville, Libraire; et Chez Crochard, Libraire, p. 1–584.
- 2365 Leach, W. E., 1817, Monograph on the genera and species of the malacostracous family Leucosidea,
- 2366 *in* Leach, W. E., ed., The Zoological Miscellany; being descriptions of new, or interesting
- 2367 animals, Volume 3: Covent Garden and London, E. Nodder and Son, p. 17–26.
- 2368 LeBlanc, J., 2021, Stratigraphic Lexicon: The Onshore Cenozoic Sedimentary Formations of The
- 2369 Republic of Panama: Biosis: Biological Systems, v. 2, no. 1, p. 1–173.
- 2370 Lima, D., Tavares, M., Lopes, R. T., de Araújo, O. M. O., and Aguilera, O., 2020, *Uca maracoani*
- 2371 (Crustacea, Decapoda, Ocypodidae) from a Miocene paleomangrove in Brazil: A case of

- 2372 evolutionary stasis among tropical American fiddler crabs: *Journal of South American Earth*  
2373 *Sciences*, v. 99, p. 102517.
- 2374 Linnaeus, C. v., 1758, *Systema Naturae per Regna Tria Naturae, Secundum Classes, Ordines,*  
2375 *Genera, Species, cum Characteribus, Differentiis, Synonymis, Locis, Holmiae, Laurentii*  
2376 *Salvii*, iii+828 p.:
- 2377 Liu, Q.-N., Tang, Y.-Y., Yang, T.-T., Li, Y.-T., and Yu, X.-M., 2021, Phylogenetic relationships of  
2378 Grapsoidea and insights into the higher phylogeny of Brachyuran: *Genomics*, v. 113, no. 1,  
2379 p. 429-439.
- 2380 Locatelli, E. R., 2013, Preservation potential of gecarcinid land crabs (Decapoda, Brachyura,  
2381 Gecarcinidae) from San Salvador: *Palaios*, v. 28, no. 12, p. 867–874.
- 2382 Londoño, L., Royer, D. L., Jaramillo, C., Escobar, J., Foster, D. A., Cárdenas-Rozo, A. L., and  
2383 Wood, A., 2018, Early Miocene CO<sub>2</sub> estimates from a Neotropical fossil leaf assemblage  
2384 exceed 400 ppm: *American Journal of Botany*, v. 105, no. 11, p. 1929-1937.
- 2385 Lorenthey, E., and Beurlen, K., 1929, Die fossilen Decapoden der Länder der Ungarischen Krone:  
2386 *Geologica Hungarica (Palaeontologica)*, v. 3, p. 1–421, 412 tables, 416 pls.
- 2387 Lörenthey , E., 1898, Beiträge zur Decapodenfauna des Ungarischen Tertiärs: *Termész Füzetek,*  
2388 *Budapest*, v. 21, p. 1–133.
- 2389 Lörenthey, E., 1907, Palaeontologiai tanulmányok a harmadkorú rákok köréből. V. Adatok Egyptom  
2390 eocen kori rákfaunájához: *Mathematikai és Természettudományi Közlemények*, v. 29, no. 2,  
2391 p. 195–242.
- 2392 Lü, J., Xia, L., Liu, X., Ma, Y., Li, J., Ye, Y., and Guo, B., 2022, The mitochondrial genome of  
2393 *Grapsus albolineatus* (Decapoda: Brachyura: Grapsidae) and phylogenetic associations in  
2394 Brachyura: *Scientific Reports*, v. 12, no. 1, p. 1-12.
- 2395 Lu, X., Gong, L., Zhang, Y., Chen, J., Liu, L., Jiang, L., Lü, Z., Liu, B., Tong, G., and Wei, X.,  
2396 2020, The complete mitochondrial genome of *Calappa bilineata*: the first representative from  
2397 the family Calappidae and its phylogenetic position within Brachyura. *Genomics*, 112(3),  
2398 pp.2516-2523.: *Genomics*, v. 112, no. 3, p. 2516–2523.
- 2399 Luque, J., Feldmann, R. M., Schweitzer, C. E., Jaramillo, C., and Cameron, C. B., 2012, The oldest  
2400 frog crabs (Decapoda: Brachyura: Raninoida) from the Aptian of northern South America:  
2401 *Journal of Crustacean Biology*, v. 32, no. 3, p. 405–420.
- 2402 Luque, J., 2014, A new genus and species of raninoidian crab (Decapoda, Brachyura), from the  
2403 Lower Cretaceous of Colombia, South America: *Scripta Geologica*, v. 147, p. 27–34.



- 2404 Luque, J., 2015a, A puzzling frog crab (Crustacea: Decapoda: Brachyura) from the Early Cretaceous  
2405 Santana Group of Brazil: Frog first or crab first?: *Journal of Systematic Palaeontology*, v. 13,  
2406 no. 2, p. 153–166.
- 2407 Luque, J., 2015b, The oldest higher true crabs (Crustacea: Decapoda: Brachyura): insights from the  
2408 Early Cretaceous of the Americas: *Palaeontology*, v. 58, no. 2, p. 251–263.
- 2409 Luque, J., 2017, Fossil hermit and land crabs (Anomura and Brachyura) from the Quaternary of  
2410 Antigua and Bermuda: *Journal of Crustacean Biology*, v. 37, no. 2, p. 151–156.
- 2411 Luque, J., Schweitzer, C. E., Santana, W., Portell, R. W., Vega, F. J., and Klompmaker, A. A., 2017,  
2412 Checklist of fossil decapod crustaceans from tropical America, Part I: Anomura and  
2413 Brachyura: *Nauplius* v. 25, p. e2017025.
- 2414 Luque, J., Christy, J. H., Hendy, A. J. W., Rosenberg, M. S., Portell, R. W., Kerr, K. A., and Palmer,  
2415 A. R., 2018, Quaternary intertidal and supratidal crabs (Decapoda, Brachyura) from tropical  
2416 America and the systematic affinities of fossil fiddler crabs: *Journal of Systematic*  
2417 *Palaeontology*, v. 16, no. 12, p. 1037–1055.
- 2418 Luque, J., Allison, W. T., Bracken-Grissom, H. D., Jenkins, K. M., Palmer, A. R., Porter, M. L., and  
2419 Wolfe, J. M., 2019a, Evolution of crab eye structures and the utility of ommatidia  
2420 morphology in resolving phylogeny: *bioRxiv preprint*, p. 786087.  
2421 <https://doi.org/10.781101/786087>.
- 2422 Luque, J., Feldmann, R. M., Vernygora, O., Schweitzer, C. E., Cameron, C. B., Kerr, K. A., Vega,  
2423 F. J., Duque, A., Strange, M., Palmer, A. R., and Jaramillo, C., 2019b, Exceptional  
2424 preservation of mid-Cretaceous marine arthropods and the evolution of novel forms via  
2425 heterochrony: *Science Advances*, v. 5, p. eaav3875.
- 2426 Luque, J., Xing, L., Briggs, D. E. G., Clark, E. G., Duque, A., Hui, J., Mai, H., and McKellar, R. C.,  
2427 2021, Crab in amber reveals an early colonization of non-marine environments during the  
2428 Cretaceous *Sciences Advances*, v. 7, p. eabj5689.
- 2429 Ma, K. Y., Qin, J., Lin, C.-W., Chan, T.-Y., Ng, P. K. L., Chu, K. H., and Tsang, L. M., 2019,  
2430 Phylogenomic analyses of brachyuran crabs support early divergence of primary freshwater  
2431 crabs: *Molecular Phylogenetics and Evolution*, v. 135, p. 62–66.
- 2432 MacFadden, B. J., Bloch, J. I., Evans, H., Foster, D. A., Morgan, G., Rincón, A., and Wood, A. R.,  
2433 2014, Temporal Calibration and Biochronology of the Centenario Fauna, Early Miocene of  
2434 Panama: *The Journal of Geology*, v. 122, p. 113–135.

- 2435 MacLeay, W. S., 1838a, On the brachyurous decapod Crustacea brought from the Cape by Dr.  
2436 Smith, *in* Smith, A., ed., Illustrations of the Annulosa of South Africa; consisting chiefly of  
2437 figures and descriptions of the objects of natural history collected during an expedition into  
2438 the interior of South Africa, in the years 1834, 1835, and 1836; fitted out by “The Cape of  
2439 Good Hope Association for Exploring Central Africa. . .”: London, Smith, Elder and  
2440 Company, p. 53–71.
- 2441 MacLeay, W. S., 1838b, On the brachyurous decapod Crustacea brought from the Cape by Dr.  
2442 Smith, *in* Smith, A., ed., Illustrations of the Annulosa of South Africa; being a portion of the  
2443 objects of natural history chiefly collected during an expedition into the interior of South  
2444 Africa, under the directin of Dr. Andrew Smith, in the years 1834, 1835. and 1836; fitted out  
2445 by “The Cape of Good Hope Association for Exploring Central Africa”. London, Smith,  
2446 Elder, and Co., p. 53–71, pp. 52 plates.
- 2447 Manning, R. B., and Holthuis, L. B., 1989, Two new genera and nine new species of geryonid crabs  
2448 (Crustacea, Decapoda, Geryonidae): Proceedings of the Biological Society of Washington, v.  
2449 102, no. 1, p. 50–77.
- 2450 Manning, R. B., and Holthuis, L. B., 1991, West African Brachyuran Crabs (Crustacea: Decapoda):  
2451 Smithsonian Contributions to Zoology, v. 396, p. 1–379.
- 2452 Martinez, S., Ramos, M. I. F., McArthur, J. M., Del Río, C. J., and Thirlwall, M. F., 2017, Late  
2453 Burdigalian (Miocene) age for pectinids (Mollusca-Bivalvia) from the Pirabas Formation  
2454 (northern Brazil) derived from Sr-isotope ( $^{87}\text{Sr}/^{86}\text{Sr}$ ) data: Neues Jahrbuch für Geologie  
2455 und Paläontologie-Abhandlungen, v. 284, no. 1, p. 57–64.
- 2456 McLean, H., Hausback, B., and Knapp, J., 1987, The geology of west-central Baja California Sur,  
2457 Mexico: US Geological Survey.
- 2458 Mendoza, J. C., Chan, K. O., Lai, J. C., Thoma, B. P., Clark, P. F., Guinot, D., Felder, D. L., and  
2459 Ng, P. K., 2022, A comprehensive molecular phylogeny of the brachyuran crab superfamily  
2460 Xanthoidea provides novel insights into its systematics and evolutionary history: Molecular  
2461 Phylogenetics and Evolution, v. 177, p. 107627.
- 2462 Miers, E. J., 1886, Report on the Brachyura collected by H.M.S. Challenger during the years 1873–  
2463 1876 *in* Murray, J., ed., Report of the Scientific Results of the Voyage of H.M.S. Challenger  
2464 during the years 1873-1876, (Zoology), Under the Command of Captain George S. Nares,  
2465 R.N., F.R.S. and the Late Captain Frank Tourle Thomson, R.N.: Edinburgh, Neil and  
2466 Company, p. 1–362.

- 2467 Milne Edwards, H., 1834-1840, Histoire naturelle des Crustacés, comprenant l'anatomie, la  
2468 physiologie et la classification de ces animaux, Roret. Paris, Librairie Encyclopédique de  
2469 Roret, v. 2, (1)468, (462)532, (463)638 p.:
- 2470 Milne Edwards, H., Observations sur les affinités zoologiques et la classification naturelle des  
2471 Crustacés, *in* Proceedings Annales des Sciences Naturelles. Zoologie. Série 3, 18: 109-166,  
2472 pls 3, 4. (second part in Annales des Sciences naturelles, Zoologie, Série 3, 20: 163–228, pls  
2473 6-11 [1853])1852.
- 2474 Milne-Edwards, A., 1862a, Monographie des Crustacés fossiles de la famille des Cancériens:  
2475 Annales des Sciences Naturelles, Zoologie, série 4, v. 18, p. 31–85.
- 2476 Milne-Edwards, A., 1862b, Sur l'existence de Crustacés de la famille des Raniniens pendant la  
2477 période crétacée: Comptes Rendus de l'Academie des Sciences de Paris, v. 55, p. 492-494.
- 2478 Milne-Edwards, A., 1865, Monographie des Crustacés Fossiles de la Famille des Cancériens:  
2479 Annales des Sciences Naturelles, 5e série, v. 3, p. 297–351.
- 2480 Milne-Edwards, A., 1873, Crustacés fossiles nouveaux des terrains tertiaires de la Gironde: Actes de  
2481 la Société Linnéenne de Bordeaux, v. 29, p. 64–66.
- 2482 Mina-Uhink, F., 1957, Bosquejo geoldgico del territorio de la Baja California: Boletin de la  
2483 Asociacidn Mexicana de Geólogos Petroleros, Mexico, D.F., v. 9, no. 3–4, p. 139–269.
- 2484 Mitchell, S. F., Pickerill, R. K., Blackwell, B. A. B., and Skinner, A. R., 2000, The age of the Port  
2485 Morant Formation, south-eastern Jamaica: Caribbean Journal of Earth Science, v. 34, p. 1-4.
- 2486 Mitchell, S. F., Pickerill, R. K., and Stemann, T. A., 2001, The Port Morant Formation (Upper  
2487 Pleistocene, Jamaica): high resolution sedimentology and paleoenvironmental analysis of a  
2488 mixed carbonate clastic lagoonal succession: Sedimentary Geology, v. 144, no. 3-4, p. 291-  
2489 306.
- 2490 Montes, C., Cardona, A., McFadden, R., Morón, S., Silva, C., Restrepo-Moreno, S., Ramírez, D.,  
2491 Hoyos, N., Wilson, J., and Farris, D., 2012, Evidence for middle Eocene and younger land  
2492 emergence in central Panama: Implications for Isthmus closure: Bulletin, v. 124, no. 5-6, p.  
2493 780–799.
- 2494 Morales-Ortega, P., González-Barba, G., Nava-Sánchez, E. H., and Vera-Dimas, D. R., 2016, New  
2495 Eocene bivalves from Bateque Formation, Baja California Sur, Mexico: Paleontología  
2496 Mexicana, v. 5, no. 1, p. 1–19.

- 2497 Mori, M., and Yamanoi, T., 2003, Pollen assemblages and palaeovegetation changes of the Bihoku  
2498 and Katsuta Groups in Hiroshima Prefecture and Okayama Prefecture, southwest Japan:  
2499 Japanese Journal of Palynology, v. 49, no. 1, p. 9–20.
- 2500 Morris, S. F., and Collins, J. S. H., 1991, Neogene crabs from Brunei, Sabah and Sarawak: Bulletin  
2501 of the British Museum (Natural History), (Geology), v. 47, no. 1, p. 1–33.
- 2502 Morris, S. F., 1993, The fossil arthropods of Jamaica, *in* Wright, R. M., and Robinson, E., eds.,  
2503 Biostratigraphy of Jamaica. Geological Society of America Memoirs, Volume 182, p. 115–  
2504 124.
- 2505 Moshhammer, B., and Schlagintweit, F., 1999, The Ernstbrunn Limestone (Lower Austria): new data  
2506 on biostratigraphy and applied geology: Abhandlungen-Geologischen Bundesanstalt, v. 56,  
2507 no. 2, p. 553–566.
- 2508 Müller, P., 1974, Decapoda (Crustacea) fauna a budapesti miocénból (1). [Les faunes de crustacés  
2509 décapodes des calcaires miocènes de Budapest (1)]: Foldtani Kozlony, v. 104, p. 119–132 [in  
2510 Hungarian  
2511 with French summary].
- 2512 Müller, P., 1978, Decapoda (Crustacea) fauna a budapesti miocénból (5): Földtani Közlöny, v. 108,  
2513 no. 3, p. 272–312.
- 2514 Müller, P., 1984, Decapod Crustacea of the Badenian: Institutum Geologicum Hungaricum,  
2515 Geologica Hungarica, Series Palaeontologica, v. 42, p. 3–317.
- 2516 Müller, P., and Collins, J. S. H., 1991, Late Eocene coral-associated decapods (Crustacea) from  
2517 Hungary: Contributions to Tertiary and Quaternary Geology, v. 28, no. 2–3, p. 47–92.
- 2518 Müller, P., 1996, Middle Miocene decapod Crustacea from southern Poland: Prace Muzeum Ziemi,  
2519 v. 43, p. 3–14.
- 2520 Müller, P., 1998, Decapode Crustacea aus dem Karpat des Korneuburger Beckens (Unter-Miozän,  
2521 Niederösterreich): Beiträge zur Paläontologie, v. 23, p. 273–281.
- 2522 Müller, P., 2006, New decapods from the Miocene of Hungary—with remarks about their  
2523 environment: Földtani Közlöny, v. 136, no. 1, p. 37–50.
- 2524 Nations, J. D., 1975, The genus Cancer (Crustacea: Brachyura): systematics, biogeography and  
2525 fossil record: Science Bulletin of the National History Museum of Los Angeles County, v.  
2526 23, p. 1–104.

- 2527 Nebelsick, J. H., Bassi, D., and Lempp, J., 2013, Tracking paleoenvironmental changes in coralline  
2528 algal-dominated carbonates of the Lower Oligocene Calcareniti di Castelgomberto formation  
2529 (Monti Berici, Italy): Facies, v. 59, no. 1, p. 133-148.
- 2530 Ng, P. K., and Castro, P., 2020, A revision of *Carcinoplax abyssicola* (Miers, 1885) and seven  
2531 related species of *Carcinoplax* H. Milne Edwards, 1852, with the description of two new  
2532 species and an updated key to the genus (Crustacea, Decapoda, Brachyura, Goneplacidae):  
2533 Zoosystema, v. 42, no. 17, p. 239–284.
- 2534 Ng, P. K. L., Guinot, D., and Davie, P. J. F., 2008, Systema Brachyurorum: Part I. An Annotated  
2535 Checklist of Extant Brachyuran Crabs of the World: The Raffles Bulletin of Zoology, v. 17,  
2536 p. 1–286.
- 2537 Nyborg, T., Garassino, A., and Slak, G., 2017, Eonomus californianus n. gen., n. sp.(Crustacea,  
2538 Brachyura, Cymon-omidae) from the Eocene Lajas Formation, California (USA): Neues  
2539 Jahrbuch für Geologie und Paläontologie-Abhandlungen, v. 286, p. 189-193.
- 2540 Ogg, J. G., 2020, Geomagnetic polarity time scale, Geologic time scale 2020, Elsevier, p. 159–192.
- 2541 Orbigny, A. D. d., 1842, Voyage dans l’Amérique méridional, 1826-1833. Géologie et  
2542 Paléontologie, Paris.
- 2543 Ortmann, A. E., 1893, Die Decapoden-Krebse des Strassburger Museums, mit besonderer  
2544 Berücksichtigung der von Herrn Dr. Döderlein bei Japan und bei den Liu-Kiu-Inseln  
2545 gesammelten und zur Zeit im Strassburger Museum aufbewahrten Formen. VII. Theil.  
2546 Abtheilung: Brachyura (Brachyura genuina Boas) II. Unterabtheilung: Cancroidea, 2.  
2547 Section: Cancrinea, 1. Gruppe: Cyclometopa. Zoologische Jahrbücher: Abteilung für  
2548 Systematik, Geographie und Biologie der Thiere, v. 7, no. 3, p. 411–495.
- 2549 Ossó, À., 2016, *Eogeryon elegius* n. gen. and n. sp. (Decapoda: Eubrachyura: Portunoidea), one of  
2550 the oldest modern crabs from late Cenomanian of the Iberian Peninsula: Boletín de la  
2551 Sociedad Geológica Mexicana, v. 68, no. 2, p. 231–246.
- 2552 Ossó, À., 2021, Un cranc nou, *Eogeryon elegius* gen. nov., sp. nov. del Cenomanià tardà de la  
2553 península Ibèrica: Nemus. Revista de l'Ateneu de Natura, no. 11, p. 144–158.
- 2554 Palacios Theil, E., Cuesta, J. A., and Felder, D. L., 2016, Molecular evidence for non-monophyly of  
2555 the pinnotheroid crabs (Crustacea: Brachyura: Pinnotheroidea), warranting taxonomic  
2556 reappraisal: Invertebrate Systematics, v. 30, p. 1–27.

- 2557 Parham, J. F., Donoghue, P. C., Bell, C. J., Calway, T. D., Head, J. J., Holroyd, P. A., Inoue, J. G.,  
2558 Irmis, R. B., Joyce, W. G., and Ksepka, D. T., 2012, Best practices for justifying fossil  
2559 calibrations: *Systematic Biology*, v. 61, no. 2, p. 346–359.
- 2560 Pasini, G., Garassino, A., De Angeli, A., Hyzný, M., Giusberti, L., and Zorzin, R., 2019, Eocene  
2561 decapod faunas from the Konservat-Lagerstätten laminites of “Pesciara”(Bolca, Verona) and  
2562 Monte Postale (Altissimo, Vicenza) in northeast Italy: a review and update: *Neues Jahrbuch*  
2563 *für Geologie und Paläontologie-Abhandlungen*, v. 293, p. 233–270.
- 2564 Pauca, M., 1929, Zwei neue fossile Decapoden aus Oligozanen Clupea crenata Schiefern von  
2565 Suslaneski-Muscel und über die Bildung der Menilitschiefern: *Bulletin de la Section*  
2566 *Scientifique de l'Académie Roumaine*, v. 12, no. 4–5, p. 40–44.
- 2567 Paulay, G., and Starmer, J., 2011, Evolution, insular restriction, and extinction of oceanic land crabs,  
2568 exemplified by the loss of an endemic *Geograpsus* in the Hawaiian Islands: *PLoS One*, v. 6,  
2569 no. 5, p. e19916.
- 2570 Perea, D., Verde, M., Toriño, P., Montenegro, F., Ubilla, M., and Manzuetti, A., 2020, A Complex  
2571 Association of Invertebrates, Vertebrates and Trace Fossils in the Marine Camacho  
2572 Formation (Late Miocene of Uruguay): Biostratigraphy and Paleoenvironments:  
2573 *Ameghiniana*, v. 57, no. 3, p. 266–277.
- 2574 Philippi, R. A., 1887, Die Tertiären und Quartären Versteinerunge Chiles, Brockhaus, Leipzig, 226  
2575 p.:
- 2576 Piller, W. E., Harzhauser, M., and Mandic, O., 2007, Miocene Central Paratethys stratigraphy–  
2577 current status and future directions: *Stratigraphy*, v. 4, no. 2–3, p. 151–168.
- 2578 Poore, G. C., and Ahyong, S. T., 2023, Marine Decapod Crustacea: A Guide to Families and Genera  
2579 of the World, CSIRO PUBLISHING, 916 p.:
- 2580 Portell, R. W., and Agnew, J., 2004, Pliocene and Pleistocene decapod crustaceans: Florida Fossil  
2581 Invertebrates, v. 4, p. 1–29.
- 2582 Prado, L. A. C., Luque, J., Barreto, A. M. F., and Palmer, A. R., 2018, New brachyuran crabs from  
2583 the Aptian–Albian Romualdo Formation, Santana Group of Brazil: Evidence for a Tethyan  
2584 connection to the Araripe Basin: *Acta Palaeontologica Polonica*, v. 63, no. 2018, p. 737–750.
- 2585 Pujalte, V., Schmitz, B., Baceta, J. I., Orue-Echebarría, X., Bernaola, G., Dinarès-Turell, J., Payros,  
2586 A., Apellaniz, E., and Caballero, F., 2009, Correlation of the Thanetian–Ilerdian turnover of  
2587 larger foraminifera and the Paleocene–Eocene thermal maximum: confirming evidence from  
2588 the Campo area (Pyrenees, Spain): *Geologica Acta*, p. 161–175.



- 2589 Quayle, W., and Collins, J., 2012, A review of the decapod crustaceans from the Tertiary of the Isle  
2590 of Wight, Hampshire, UK, with description of three new species: Bulletin of the Mizunami  
2591 Fossil Museum, v. 38, p. 33–51.
- 2592 Quayle, W. J., and Collins, J. S. H., 1981, New Eocene crabs from the Hampshire Basin:  
2593 Palaeontology, v. 24, no. 4, p. 733–758.
- 2594 Raine, J. I., Beu, A. G., Boyes, A. F., Campbell, H. J., Cooper, R. A., Crampton, J. S., Crundwell,  
2595 M. P., Hollis, C. J., and Morgans, H. E. G., 2015, Revised calibration of the New Zealand  
2596 geological timescale: NZGT2015/1, GNS Science Report 2012/39, 53 p.:
- 2597 Rathbun, M. J., 1897, A revision of the nomenclature of the Brachyura: Proceedings of the  
2598 Biological Society of Washington, v. 11, p. 153–167.
- 2599 Rathbun, M. J., 1898, The Brachyura of the biological expedition to the Florida Keys and the  
2600 Bahamas in 1893: Bulletin from the Laboratories of Natural History, State University of  
2601 Iowa, v. 4, no. 3, p. 250–294.
- 2602 Rathbun, M. J., 1918 [1919], Decapod crustaceans from the Panama region, *in* Vaughan, T. W., ed.,  
2603 Contributions to the geology and paleontology of the Canal Zone, Panama and geologically  
2604 related areas in Central America and the West Indies. Bulletin of the United States National  
2605 Museum, Volume 103, p. 123–184.
- 2606 Rathbun, M. J., 1926, The fossil stalk-eyed Crustacea of the Pacific slope of North America, US  
2607 Government Printing Office, Bulletin of the United States National Museum.
- 2608 Rathbun, M. J., 1935, Fossil Crustacea of the Atlantic and Gulf Coastal Plain: Geological Society of  
2609 America, v. Special Paper, no. 2, p. i–viii, 1–160.
- 2610 Rathbun, M. J., 1937, Cretaceous and Tertiary crabs from Panama and Colombia: Journal of  
2611 Paleontology, v. 11, no. 1, p. 26–28.
- 2612 Reichenbacher, B., Krijgsman, W., Lataster, Y., Pipperr, M., Van Baak, C. G., Chang, L., Kälin, D.,  
2613 Jost, J., Doppler, G., and Jung, D., 2013, A new magnetostratigraphic framework for the  
2614 lower Miocene (Burdigalian/Ottnangian, Karpatian) in the North Alpine Foreland Basin:  
2615 Swiss Journal of Geosciences, v. 106, no. 2, p. 309–334.
- 2616 Reuss, A. E., 1857, Zur Kenntnis fossiler Krabben: Sitzungsberichte der Akademie der  
2617 Wissenschaften, v. 27, p. 161–166.
- 2618 Reuss, A. E., 1859, Zur Kenntnis fossiler Krabben: Denkschriften der Kaiserlichen Akademie der  
2619 Wissenschaften. Mathematisch-Naturwissenschaftliche Classe, v. 17, p. 1–90.

- 2620 Ristori, G., 1886, I crostacei brachiuri e anomuri del pliocene italiano: Bollettino della Società  
2621 Geologica Italiana, v. 5, p. 93–128.
- 2622 Robins, C. M., Feldmann, R. M., and Schweitzer, C. E., 2013, Nine new genera and 24 new species  
2623 of the Munidopsidae (Decapoda: Anomura: Galatheaidea) from the Jurassic Ernstbrunn  
2624 Limestone of Austria, and notes on fossil munidopsid classification: Annalen des  
2625 Naturhistorischen Museums in Wien. Serie A für Mineralogie und Petrographie, Geologie  
2626 und Paläontologie, Anthropologie und Prähistorie, p. 167–251.
- 2627 Robins, C. M., and Klompmaker, A. A., 2019, Extreme diversity and parasitism of Late Jurassic  
2628 squat lobsters (Decapoda: Galatheaidea) and the oldest records of porcellanids and  
2629 galatheids: Zoological Journal of the Linnean Society, v. 187, no. 4, p. 1131-1154.
- 2630 Roemer, F. A., 1887, *Graptocarcinus texanus*, ein Brachyure aus der oberen Kreide von Texas:  
2631 Leonhardt und Bronn's Neues Jahrbuch für Mineralogie, Geologie, und Paläontologie, v. 1,  
2632 p. 173–176.
- 2633 Ross, A., Lewis, J. E., and Scolaro, R. J., 1964, New Eocene decapods from Florida: Quarterly  
2634 Journal of the Florida Academy of Sciences, v. 27, no. 3, p. 187–196.
- 2635 Roux, P., 1828-1830, Crustacés de la Méditerranée et de son littoral. Décrits et Lithographiés par  
2636 Polydore Roux, Conservateur du Cabinet d'histoire naturelle de la Ville de Marseille. , Paris,  
2637 Levrault.
- 2638 Rumsey, B. T., Klompmaker, A. A., and Portell, R. W., 2016, Paleobiogeography of the fossil box  
2639 crab Calappilia (Brachyura: Calappidae) with a new species from the Eocene-Oligocene of  
2640 Florida, USA: Journal of Crustacean Biology, v. 36, no. 3, p. 329-337.
- 2641 Sadler, P. M., 1988, Geometry and stratification of uppermost cretaceous and paleogene units on  
2642 Seymour Island, Northern Antarctic Peninsula, *in* Feldmann, R. M., and Woodburne, M.,  
2643 eds., Geology and Paleontology of Seymour Island, Antarctic Peninsula. Memoirs of the  
2644 Geological Society of America, Volume 169: California, Geological Society of America, p.  
2645 303–320.
- 2646 Samouelle, G., 1819, The entomologist's useful compendium; or an introduction to the knowledge  
2647 of British insects, comprising the best means of obtaining and preserving them, and a  
2648 description of the apparatus generally used; together with the genera of Linné, and the  
2649 modern method of arranging the classes Crustacea, Myriapoda, Spiders, Mites and Insects,  
2650 from their affinities and structure, according to the views of Dr. Leach, London.



- 2651 Schneider, S., Harzhauser, M., Kroh, A., Lukeneder, A., and Zuschin, M., 2013, Ernstbrunn  
2652 Limestone and Klentnice beds (Kimmeridgian Berriasian; Waschberg-dánice Unit; NE  
2653 Austria and SE Czech Republic): state of the art and bibliography: Bulletin of Geosciences,  
2654 v. 88, no. 10.
- 2655 Scholtz, G., and Richter, S., 1995, Phylogenetic systematics of the reptantian Decapoda (Crustacea,  
2656 Malacostraca): Zoological Journal of the Linnaean Society, v. 113, p. 289–328.
- 2657 Scholtz, G., 2014, Evolution of crabs—history and deconstruction of a prime example of  
2658 convergence: Contributions to Zoology, v. 83, no. 2, p. 87–105.
- 2659 Scholtz, G., 2020, *Eocarcinus praecursor* Withers, 1932 (Malacostraca, Decapoda, Meiura) is a  
2660 stem group brachyuran: Arthropod Structure & Development.
- 2661 Schram, F. R., and Dixon, C. J., 2004, Decapod phylogeny: addition of fossil evidence to a robust  
2662 morphological cladistic data set: Bulletin of the Mizunami Fossil Museum, v. 31, p. 1–19.
- 2663 Schram, F. R., and Ng, P. K. L., 2012, What is *Cancer*?: Journal of Crustacean Biology, v. 32, no. 4,  
2664 p. 665–672.
- 2665 Schubart, C. D., and Cuesta, J. A., 2010, Phylogenetic relationships of the Plagusiiidae Dana, 1851  
2666 (Brachyura), with description of a new genus and recognition of Percnidae Stevcic, 2005, as  
2667 an independent family: Crustaceana Monographs, v. 11, p. 279–299.
- 2668 Schweitzer, C. E., 2000, Tertiary Xanthoidea (Crustacea: Decapoda: Brachyura) from the west coast  
2669 of North America: Journal of Crustacean Biology, v. 20, no. 4, p. 715–742.
- 2670 Schweitzer, C. E., and Feldmann, R. M., 2000a, New species of calappid crabs from western North  
2671 America and reconsideration of the Calappidae sensu lato: Journal of Paleontology, v. 74,  
2672 no. 2, p. 230–246.
- 2673 Schweitzer, C. E., and Feldmann, R. M., 2000b, Reevaluation of the Cancridae Latreille, 1803  
2674 (Decapoda: Brachyura) including three new genera and three new species: Contributions to  
2675 Zoology, v. 69, p. 223–250.
- 2676 Schweitzer, C. E., Feldmann, R. M., Tucker, A. B., and Berglund, R. E., 2000, Eocene decapod  
2677 crustaceans from Pulali Point, Washington: Annals of the Carnegie Museum, v. 69, no. 1, p.  
2678 23–67.
- 2679 Schweitzer, C. E., and Feldmann, R. M., 2001, Differentiation of the fossil Hexapodidae Miers,  
2680 1886 (Decapoda: Brachyura) from similar forms: Journal of Paleontology, v. 75, p. 330–345.
- 2681 Schweitzer, C. E., Feldmann, R. M., González-Barba, G., and Vega, F. J., 2002, New crabs from the  
2682 Eocene and Oligocene of Baja California Sur, Mexico and an assessment of the evolutionary

- 2683 and paleobiogeographic Implications of Mexican fossil decapods: Paleontological Society
- 2684 Memoir, v. 76, p. 1–43.
- 2685 Schweitzer, C. E., Feldmann, R. M., and Gingerich, P. D., 2004, New Decapoda (Crustacea) from
- 2686 the middle and late Eocene of Pakistan and a revision of *Lobonotus* A. Milne Edwards, 1864:
- 2687 University of Michigan, Contributions from the Museum of Paleontology, v. 31, no. 4, p.
- 2688 89–118.
- 2689 Schweitzer, C. E., 2005, The Trapeziidae and Domeciidae (Decapoda: Brachyura: Xanthoidea) in
- 2690 the fossil record and a new Eocene genus from Baja California Sur, Mexico: Journal of
- 2691 Crustacean Biology, v. 25, no. 4, p. 625–636.
- 2692 Schweitzer, C. E., Feldmann, R. M., González-Barba, G., and Cosovic, V., 2006, New Decapoda
- 2693 (Anomura, Brachyura) from the Eocene Bateque and Tepetate Formations, Baja California
- 2694 Sur, Mexico: Bulletin of the Mizunami Fossil Museum, v. 33, p. 21–45.
- 2695 Schweitzer, C. E., Feldmann, R. M., and Lazar, I., 2009, Fossil Crustacea (excluding Cirripedia and
- 2696 Ostracoda) in the University of Bucharest Collections, Romania, including two new species:
- 2697 Bulletin of the Mizunami Fossil Museum, v. 35, p. 1–14.
- 2698 Schweitzer, C. E., and Feldmann, R. M., 2010a, Earliest known Porcellanidae (Decapoda: Anomura:
- 2699 Galatheoidea) (Jurassic: Tithonian): Neues Jahrbuch für Geologie und Paläontologie,
- 2700 Abhandlungen, v. 258, no. 2, p. 243–248.
- 2701 Schweitzer, C. E., and Feldmann, R. M., 2010b, New fossil decapod crustaceans from the Remy
- 2702 Collection, Muséum national d'Histoire naturelle, Paris: Geodiversitas, v. 32, no. 3, p. 399–
- 2703 415.
- 2704 Schweitzer, C. E., Feldmann, R. M., Garassino, A., Karasawa, H., and Schweigert, G., 2010,
- 2705 Systematic List of Fossil Decapod Crustacean Species: Crustaceana Monographs, v. 10, p.
- 2706 222.
- 2707 Schweitzer, C. E., and Feldmann, R. M., 2011, New fossil Brachyura (Decapoda: Homoloidea,
- 2708 Dorippoidea, Carpilioidea) from the United Kingdom: Bulletin of the Mizunami Fossil
- 2709 Museum, v. 37, p. 1–11.
- 2710 Schweitzer, C. E., and Feldmann, R. M., 2012, Revision of Decapoda deposited in The Muséum
- 2711 national d'Histoire naturelle, Paris: Bulletin of the Mizunami Fossil Museum, v. 38, p. 15–
- 2712 27.
- 2713 Schweitzer, C. E., Feldmann, R. M., and Karasawa, H., 2012, Part R, Revised, Volume 1, Chapter
- 2714 8M: Systematic Descriptions: Section Dromiacea: Treatise Online, v. 51, p. 1–43, 24 figs.

- 2715 Schweitzer, C. E., Karasawa, H., Luque, J., and Feldmann, R. M., 2016a, Phylogeny and  
2716 classification of Necrocarcinoidea Förster, 1968 (Brachyura: Raninoidea) with description of  
2717 two new genera: *Journal of Crustacean Biology*, v. 36, no. 3, p. 338–372.
- 2718 Schweitzer, C. E., Odumodu, C. F. R., and Feldmann, R. M., 2016b, New Eocene crabs from  
2719 Nigeria (Decapoda: Brachyura: Heterotremata): *Annals of Carnegie Museum*, v. 84, no. 1, p.  
2720 59–73.
- 2721 Schweitzer, C. E., Feldmann, R. M., and Karasawa, H., 2017, Part R, Revised, Volume 1, Chapter  
2722 8R: Systematic Descriptions: Section Cyclodorippoidea: *Treatise Online*, v. 97, p. 1–6, 4 figs.
- 2723 Schweitzer, C. E., Feldmann, R. M., Karasawa, H., and Luque, J., 2018, Part R, Revised, Volume 1,  
2724 Chapter 8S: Systematic Descriptions: Section Raninoidea: *Treatise Online*, v. 113, p. 1–42, 20  
2725 figs.
- 2726 Schweitzer, C. E., Feldmann, R. M., and Karasawa, H., 2021a, Part R, Revised, Volume 1, Chapter  
2727 8T17: Systematic descriptions: Superfamily Dorippoidea, *Treatise Online*, Volume 159, p.  
2728 1–8.
- 2729 Schweitzer, C. E., Feldmann, R. M., and Karasawa, H., 2021b, Part R, Revised, Volume 1, Chapter  
2730 8T10: Systematic descriptions: Superfamily Ethioidea, *Treatise Online*, Volume 132, p. 1–8.
- 2731 Schweitzer, C. E., Feldmann, R. M., and Karasawa, H., 2021c, Part R, Revised, Volume 1, Chapter  
2732 8T15: Systematic descriptions: Superfamily Portunoidea, *Treatise Online*, Volume 151, p. 1–  
2733 40.
- 2734 Schweitzer, C. E., Feldmann, R. M., and Karasawa, H., 2021d, Part R, Revised, Volume 1, Chapter  
2735 8T16: Systematic descriptions: Superfamilies Trapezioidea and Xanthoidea, *Treatise Online*,  
2736 Volume 153, p. 1–42.
- 2737 Scott, R. W., Schlager, W., Fouke, B., and Nederbragt, S. A., 2000, Are mid-Cretaceous eustatic  
2738 events recorded in Middle East carbonate platforms?, *in* Alsharhan, A. S., and Scott, R. W.,  
2739 eds., *Middle East models of Jurassic/Cretaceous Carbonate Systems: SEPM Special*  
2740 *Publication*, Volume 69, p. 73–84.
- 2741 Scott, R. W., Benson, D. G., Morin, R. W., Shaffer, B. L., and Oboh-Ikuenobe, F. E., 2002,  
2742 Integrated Albian-Lower Cenomanian chronostratigraphy standard, Trinity River section,  
2743 Texas: US Gulf Coast Cretaceous stratigraphy and paleoecology: Gulf Coast Section,  
2744 Society of Economic Paleontologists and Mineralogists, Bob F. Perkins Memorial Volume,  
2745 v. 23, p. 277–334.

- 2746 Scott, R. W., Campbel, W., Hojnacki, R., Wang, Y., and Lai, X., 2016, Albian rudist biostratigraphy  
2747 (Bivalvia), Comanche shelf to shelf margin, Texas.
- 2748 Secrétan, S., 1975, Les Crustacés du Monte Bolca. Studi e Ricerche sui Giacimenti Terziari di Bolca  
2749 II, Miscellanea Paleontologica: Museo Civico di Storia Naturale - Studi e Ricerche sui  
2750 giacimenti terziari di Bolca, Verona, v. 2, p. 315-388, pls. I-XXXVII.
- 2751 Serra-Kiel, J., Canudo, J., Dinares, J., Molina, E., Ortiz, N., Pascual, J., Samsó, J., and Tosquella, J.,  
2752 1994, Cronoestratigrafía de los sedimentos marinos del Terciario inferior de la Cuenca de  
2753 Graus-Tremp (Zona Central Surpirenaica): Revista de la Sociedad Geológica de España, v.  
2754 7, no. 3–4, p. 273–297.
- 2755 Serrano-Sánchez, M., Hegna, T. A., Schaaf, P., Pérez, L., Centeno-García, E., and Vega, F. J., 2015,  
2756 The aquatic and semiaquatic biota in Miocene amber from the Campo La Granja mine  
2757 (Chiapas, Mexico): Paleoenvironmental implications: Journal of South American Earth  
2758 Sciences, v. 62, p. 243-256.
- 2759 Serrano-Sánchez, M. d. L., Guerao, G., Centeno-García, E., and Vega, F. J., 2016, Crabs  
2760 (Brachyura: Grapsoidea: Sesarmidae) as inclusions in Lower Miocene amber from Chiapas,  
2761 Mexico: Boletín de la Sociedad Geológica Mexicana, v. 68, no. 1, p. 37–43.
- 2762 Shi, G., Grimaldi, D. A., Harlow, G. E., Wang, J., Wang, J., Yang, M., Lei, W., Li, Q., and Li, X.,  
2763 2012, Age constraint on Burmese amber based on U–Pb dating of zircons: Cretaceous  
2764 Research, v. 37, p. 155–163.
- 2765 Solórzano Kraemer, M., 2007, Systematic, palaeoecology, and palaeobiogeography of the insect  
2766 fauna from Mexican amber: Palaeontographica Abteilung A, p. 1–133.
- 2767 Sorensen, P. A., 1982, Sedimentology and sedimentary petrology of a Paleocene Basin near Laguna  
2768 San Ignacio, Baja California Sur, Mexico [Master of Arts: University of California, Santa  
2769 Barbara, California, United States, 123 p.
- 2770 Spiridonov, V. A., Neretina, T. V., and Schepetov, D., 2014, Morphological characterization and  
2771 molecular phylogeny of Portunoidea Rafinesque, 1815 (Crustacea Brachyura): implications  
2772 for understanding evolution of swimming capacity and revision of the family-level  
2773 classification: Zoologischer Anzeiger - A Journal of Comparative Zoology, v. 253, no. 5, p.  
2774 404–429.
- 2775 Stebbing, T. R. R., 1920, The Malacostraca of Durban Bay: Durban Museum Novitates, v. 2, no. 6,  
2776 p. 263–278.

- 2777 Stenzel, H. B., 1944, A new Cretaceous crab, *Graptocarcinus muiri*, from Mexico: Journal of  
2778 Paleontology, v. 18, no. 6, p. 550–552.
- 2779 Stevcic, Z., 2005, The reclassification of brachyuran crabs (Crustacea: Decapoda: Brachyura):  
2780 Natura Croatica, v. 14, no. 1, p. 1–159.
- 2781 Stimpson, W., 1858, Prodromus descriptionis animalium evertibratorum, quae in Expeditione ad  
2782 Oceanum Pacificum Septentrionalem, a Republica Federata missa, Cadwaladaro Ringgold et  
2783 Johanne Rodgers ducibus, observavit et descripsit. Pars VII. Crustacea Anomura:  
2784 Proceedings of the Academy of Natural Sciences of Philadelphia, v. 10, no. 7, p. 225–252  
2785 [Pages 263-290 on separate].
- 2786 Stimpson, W., 1859, Notes on North American Crustacea in the Museum of the Smithsonian  
2787 Institution No. 1: Annals of the Lyceum of Natural History, New York, v. 7, no. 1962, p. 49–  
2788 93.
- 2789 Stimpson, W., 1860, Notes on North American Crustacea in the Museum of the Smithsonian  
2790 Institution No. 2: Annals of the Lyceum of Natural History, New York, v. 7, p. 176–246.
- 2791 Stoliczka, F., 1871, Observations on fossil crabs from Tertiary deposits in Sind and Kutch: Memoirs  
2792 of the Geological Survey of India, Palaeontologica Indica, (7) (14), v. 1, no. 1, p. 1–16.
- 2793 Studer, T., 1892, Ueber zwei fossile dekapode Krebse aus den Molasseablagerungen des  
2794 Belpberges: Abhandlungen der Schweizerischen Paläontologischen Gesellschaft, v. 19, p. 1–  
2795 8.
- 2796 Suzuki, S., Danhara, T., and Tanaka, H., 2003, Fission-track dating of Tertiary tuff samples from the  
2797 Kibi Plateau Area, Okayama prefecture, Southwest Japan: Journal of Geography, v. 112, p.  
2798 35–49.
- 2799 Sztrákos, K., and Steurbaut, E., 2017, Révision lithostratigraphique et biostratigraphique de  
2800 l'Oligocène d'Aquitaine occidentale (France): Geodiversitas, v. 39, no. 4, p. 741–781.
- 2801 Taguchi, E., 2002, Stratigraphy, molluscan fauna and paleoenvironment of the Miocene Katsuta  
2802 Group in Okayama Prefecture, Southwest Japan: Bulletin of the Mizunami Fossil Museum,  
2803 v. 29, p. 95–133.
- 2804 Tan, M. H., Gan, H. M., Lee, Y. P., Linton, S., Grandjean, F., Bartholomei-Santos, M. L., Miller, A.  
2805 D., and Austin, C. M., 2018, ORDER within the chaos: Insights into phylogenetic  
2806 relationships within the Anomura (Crustacea: Decapoda) from mitochondrial sequences and  
2807 gene order rearrangements: Molecular Phylogenetics and Evolution, v. 127, p. 320-331.

- 2808 Tang, Y.-Y., Tang, B.-P., Xin, Z.-Z., Li, Y.-T., Zha, X.-H., Zhang, D.-Z., Sun, Y., Liu, Q.-N., and  
2809 Ma, Y.-F., 2020, Characterization of the complete mitochondrial genome of *Helice latimera*  
2810 and its phylogenetic implications in Brachyura: Genomics, v. 112, no. 6, p. 5180-5187.
- 2811 Tavares, M., 1993, Crustacea Decapoda: les Cyclodorippidae et Cymonomidae de l'Indo-Ouest-  
2812 Pacifique à l'exclusion du genre *Cymonomus*, in Crosnier, A., ed., Résultats des Campagnes  
2813 MUSORSTOM, Volume 10. Mémoires du Muséum national d'Histoire naturelle, Volume  
2814 156, p. 253–313.
- 2815 Thoma, B. P., Guinot, D., and Felder, D. L., 2014, Evolutionary relationships among American mud  
2816 crabs (Crustacea: Decapoda: Brachyura: Xanthoidea) inferred from nuclear and  
2817 mitochondrial markers, with comments on adult morphology: Zoological Journal of the  
2818 Linnean Society, v. 170, no. 1, p. 86–109.
- 2819 Thurmann, J., 1853, Lettres écrites du Jura à la Société d'histoire naturelle de Berne: Lettre IX,  
2820 Mitteilungen der Naturforschenden Gesellschaft Bern.
- 2821 Tsang, C. T., Schubart, C. D., Chu, K. H., Ng, P. K., and Tsang, L. M., 2022, Molecular phylogeny  
2822 of Thoracotremata crabs (Decapoda, Brachyura): Toward adopting monophyletic  
2823 superfamilies, invasion history into terrestrial habitats and multiple origins of symbiosis:  
2824 Molecular Phylogenetics and Evolution, v. 177, p. 107596.
- 2825 Tsang, L. M., Schubart, C. D., Ahyong, S. T., Lai, J. C. Y., Au, E. Y. C., Chan, T.-Y., Ng, P. K. L.,  
2826 and Chu, K. H., 2014, Evolutionary history of true crabs (Crustacea: Decapoda: Brachyura)  
2827 and the origin of freshwater crabs: Molecular Biology and Evolution, v. 31, no. 5, p. 1173–  
2828 1187.
- 2829 Tucker, A. B., and Feldmann, R. M., 1990, Fossil decapod crustaceans from the lower Tertiary of  
2830 the Prince William Sound region, Gulf of Alaska: Journal of Paleontology, v. 64, p. 409–  
2831 427.
- 2832 Tucker, A. B., 1998, Systematics of the Raninidae (Crustacea: Decapoda: Brachyura), with accounts  
2833 of three new genera and two new species: Proceedings of the Biological Society of  
2834 Washington, v. 111, no. 2, p. 320–371.
- 2835 Ungaro, S., 1978, L'Oligocene dei Colli Berici: Rivista, Italiana di Paleontologia e Stratigrafia, v.  
2836 84, p. 199–278.
- 2837 Van Bakel, B. W., Guinot, D., Corral, J. C., and Artal, P., 2012a, Graptocarcininae n. subfam., an  
2838 extinct subfamily of Dynomenidae Ortmann, 1892 (Crustacea, Brachyura, Podotremata):  
2839 Zootaxa, v. 3534, no. 1, p. 40–52.



- 2840 Van Bakel, B. W., Mychko, E. V., Spiridonov, A., Jagt, J. W., and Fraaije, R. H., 2021, New  
2841 Cretaceous crabs (Crustacea, Brachyura) from Moscow Oblast and Dagestan (Russia):  
2842 patterns in phylogeny and morphospace of the oldest eubrachyurans (Dorippoidea):  
2843 Cretaceous Research, v. 119, p. 104675.
- 2844 Van Bakel, B. W. M., Guinot, D., Artal, P., Fraaije, R. H. B., and Jagt, J. W. M., 2012b, A revision  
2845 of the Palaeocorystoidea and the phylogeny of raninoidian crabs (Crustacea, Decapoda,  
2846 Brachyura, Podotremata): Zootaxa, v. 3215, p. 1–216.
- 2847 Van Straelen, V., 1920, Catalogue des crustacés décapodes des terrains Tertiaires de la Belgique:  
2848 Annales de la Société royale zoologique de Belgique, v. 51, p. 111–131.
- 2849 Varola, A., 1981, Crostacei Decapodi neogenici della penisola salentina (Italia): Thalassia salentina,  
2850 v. 11, p. 3–51.
- 2851 Vega, F. J., Cosma, T., Coutiño, M. A., Feldmann, R. M., Nyborg, T., Schweitzer, C. E., and  
2852 Waugh, D. A., 2001, New middle Eocene decapods (Crustacea) from Chiapas, Mexico:  
2853 Journal of Paleontology, v. 75, p. 929–946.
- 2854 Vega, F. J., Nyborg, T., Fraaye, R. H., and Espinosa, B., 2007, Paleocene decapod Crustacea from  
2855 the Rancho Nuevo Formation (Parras Basin-Difunta Group), Northeastern México: Journal  
2856 of Paleontology, v. 81, no. 6, p. 1432–1441.
- 2857 Vega, F. J., Nyborg, T., Coutiño, M. A., and Hernández-Monzón, O., 2008, Review and additions to  
2858 the Eocene decapod Crustacea from Chiapas, Mexico: Bulletin of the Mizunami Fossil  
2859 Museum, v. 34, p. 51–71.
- 2860 Vega, F. J., Nyborg, T., Coutiño, M. A., Solé, J., and Hernández-Monzón, O., 2009, Neogene  
2861 Crustacea from Southeastern Mexico: Bulletin of the Mizunami Fossil Museum, v. 35, p.  
2862 51–69.
- 2863 Wagerich, M., Hohenegger, J., and Ćorić, S., Base and new definition of the Lower Badenian and  
2864 the age of the Badenian stratotype (Middle Miocene, Central Paratethys), in Proceedings  
2865 STRATI 2013: First International Congress on Stratigraphy At the Cutting Edge of  
2866 Stratigraphy2014, Springer, p. 615–618.
- 2867 Wang, Q., Tang, D., Guo, H., Wang, J., Xu, X., and Wang, Z., 2020, Comparative mitochondrial  
2868 genomic analysis of *Macrophthalmus pacificus* and insights into the phylogeny of the  
2869 Ocypodoidea & Grapsoidea: Genomics, v. 112, no. 1, p. 82–91.
- 2870 Wang, Z., Wang, Z., Shi, X., Wu, Q., Tao, Y., Guo, H., Ji, C., and Bai, Y., 2018, Complete  
2871 mitochondrial genome of *Parasesarma affine* (Brachyura: Sesarmidae): Gene

- 2872 rearrangements in Sesarmidae and phylogenetic analysis of the Brachyura: International  
2873 journal of biological macromolecules, v. 118, p. 31–40.
- 2874 Watson-Zink, V. M., 2021, Making the grade: physiological adaptations to terrestrial environments  
2875 in decapod crabs: Arthropod structure & development, v. 64, p. 101089.
- 2876 Webber, W., Fenwick, G., Bradford-Grieve, J., Eagar, S., Buckeridge, J., Poore, G., Dawson, E.,  
2877 Watling, L., Jones, J., Wells, J., Bruce, N., Ah Yong, S., Larsen, K., Chapman, M., Olesen, J.,  
2878 Ho, J., Green, J., Shiel, R., Rocha, C., Lorz, A., Bird, G., and Charleston, W., 2010, Phylum  
2879 Arthropoda Subphylum Crustacea: shrimps, crabs, lobsters, barnacles, slaters, and kin, *in*  
2880 Gordon, D. P., ed., New Zealand Inventory of Biodiversity: Volume Two: Kingdom  
2881 Animalia - Chaetognatha, Ecdysozoa, Ichnofossils, : New Zealand, Canterbury University  
2882 Press, p. 98–232.
- 2883 Weber, F., 1795, Nomenclator Entomologicus Secundum Entomologiam Systematicum ill: Fabricii  
2884 Adjectis Speciebus Recens Detectis et Varietatibus. C. E. Bohn., Chilonii et Hamburgi,  
2885 Chilonii and Hamburgi, 171 p.:
- 2886 Wegner, W., Wörner, G., Harmon, R. S., and Jicha, B. R., 2011, Magmatic history and evolution of  
2887 the Central American Land Bridge in Panama since Cretaceous times: Bulletin, v. 123, no. 3-  
2888 4, p. 703-724.
- 2889 Williams, A. B., and Child, C. A., 1988, Comparison of some genera and species of box crabs  
2890 (Brachyura: Calappidae), southwestern North Atlantic, with description of a new genus and  
2891 species: Fishery Bulletin, Washington, v. 87, no. 1, p. 105–121.
- 2892 Windsor, A. M., and Felder, D. L., 2014, Molecular phylogenetics and taxonomic reanalysis of the  
2893 family Mithracidae MacLeay (Decapoda : Brachyura : Majoidea): Invertebrate Systematics,  
2894 v. 28, p. 145–173.
- 2895 Withers, T. H., 1932, XXXIII.—A Liassic crab, and the origin of the Brachyura: Annals and  
2896 Magazine of Natural History, v. 9, no. 51, p. 313–323.
- 2897 Wolfe, J. M., Daley, A. C., Legg, D. A., and Edgecombe, G. D., 2016, Fossil calibrations for the  
2898 arthropod Tree of Life: Earth-Science Reviews, v. 160, p. 43–110.
- 2899 Wolfe, J. M., Breinholt, J. W., Crandall, K. A., Lemmon, A. R., Moriarty Lemmon, E., Timm, L. E.,  
2900 Siddall, M. E., and Bracken-Grissom, H. D., 2019, A phylogenomic framework,  
2901 evolutionary timeline and genomic resources for comparative studies of decapod  
2902 crustaceans: Proceedings of the Royal Society B, v. 286, p. 20190079.



2903 Wolfe, J. M., Luque, J., and Bracken-Grissom, H. D., 2021, How to Become a Crab: Phenotypic  
2904 Constraints on a Recurring Body Plan: Bioessays, v. 43, no. 5, p. 1–14.

2905 Wolfe, J. M., Ballou, L., Luque, J., Watson-Zink, V. M., Ahyong, S. T., Barido-Sottani, J., Chan, T.-  
2906 Y., Chu, K. H., Crandall, K. A., Daniels, S. R., Felder, D. L., Mancke, H., Martin, J. W., Ng,  
2907 P. K. L., Ortega-Hernández, J., Palacios Theil, E., Pentcheff, N. D., Robles, R., Thoma, B.  
2908 P., Tsang, L. M., Wetzer, R., Windsor, A. M., and Bracken-Grissom, H. D., 2022,  
2909 Convergent adaptation of true crabs (Decapoda: Brachyura) to a gradient of terrestrial  
2910 environments: bioRxiv, p. 2022-2012.

2911 Woods, H., 1922, Crustacea from the Eocene deposits of Peru, *in* Bosworth, T. O., ed., Geology of  
2912 the Tertiary and Quaternary Periods in the northwest part of Peru: London, Macmillan and  
2913 Co., p. 114–118.

2914 Yoshimoto, Y., 1979, 38. Tsuyama basin, Okayama Prefecture, *in* Tsuchi, R., ed., Fundamental data  
2915 on Japanese Neogene Bio- and Chronostratigraphy, IGCO-114 National Working Group of  
2916 Japan, Shizuoka (in Japanese), p. 113–114.

2917 Zeiss, A., 2001, Die Ammonitenfauna der Tithonklippen von Ernstbrunn, Niederösterreich: Neue  
2918 Denkschriften des Naturhistorischen Museums in Wien, Neue Serie, v. 6, p. 1–117.

2919 Zhang, Y., Gong, L., Lu, X., Miao, Z., Jiang, L., Liu, B., Liu, L., Li, P., Zhang, X., and Lü, Z., 2022,  
2920 Comparative mitochondrial genome analysis of Varunidae and its phylogenetic implications:  
2921 Acta Oceanologica Sinica, v. 41, no. 6, p. 119-131.  
2922  
2923  
2924

# FIGURE CAPTIONS

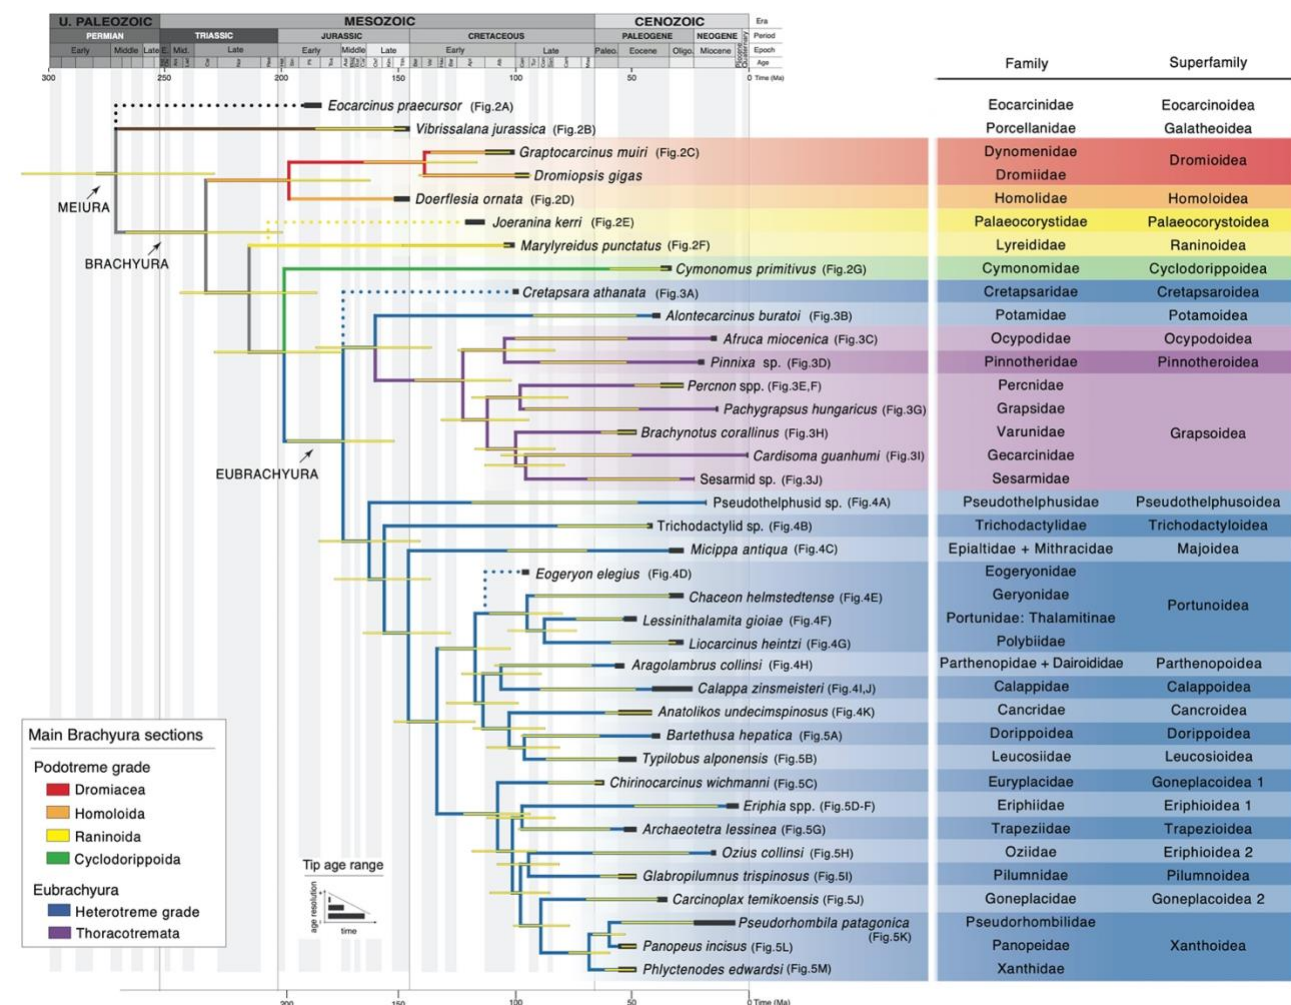

**Figure 1.** Phylogenetic relationships among 38 meiuran families (36 Brachyura in ingroup), as represented by their oldest reliable vetted fossil species occurrences to date and their age brackets, used as calibration points for node dated molecular divergence time estimations of brachyuran crabs in Wolfe et al. (2022). Fossil species used for node dating are here represented as terminals. Base topology and full maximum clade credibility divergence time estimates (thin shaded yellow bars, representing 95% HPD) after Wolfe et al. (2022). Main brachyuran sections, and the family and superfamily ingroups focus of this study, coloured as follows: Dromioidea (red), Homoloidea (orange), Raninoidea (yellow), Cyclodorippoidea (green), heterotreme Eubrachyura (blue), and thoracotreme Eubrachyura (purple). Oldest crown Porcellanidae (Anomura, brown) and the extinct Eocarcinidae (black dotted line), as non-crown brachyuran outgroups. Fossil age ranges (thick dark grey bars) denote the maximum (left end) and minimum (right end) age brackets for the selected calibration points, based on available chronostratigraphic information derived from isotopic, magnetostratigraphic, or bio-stratigraphic data (see main text). Longer grey bars (e.g., *Calappa zinsmeisteri*) indicate a wider age gap between the tip maximum and minimum ages for a given taxon, and thus less age resolution for the relative age of the fossil, whereas thinner grey bars (e.g., pseudothelphusid sp.) indicate a narrower age gap between their tip maximum and minimum ages, and thus more resolution and preciseness of the relative age of the fossil. Phylogenetic placement of *Joeranina kerri* (Raninoidea: Palaeocorystoidea: Palaeocorystidae) (yellow dotted line) after Luque et al. (2019b) and of *Cretapsara athanata* (Eubrachyura: Cretapsaridae) and *Eogeryon elegius* (Eubrachyura: Portunoidea: Eogeryonidae) (blue dotted lines) after Luque et al. (2021).

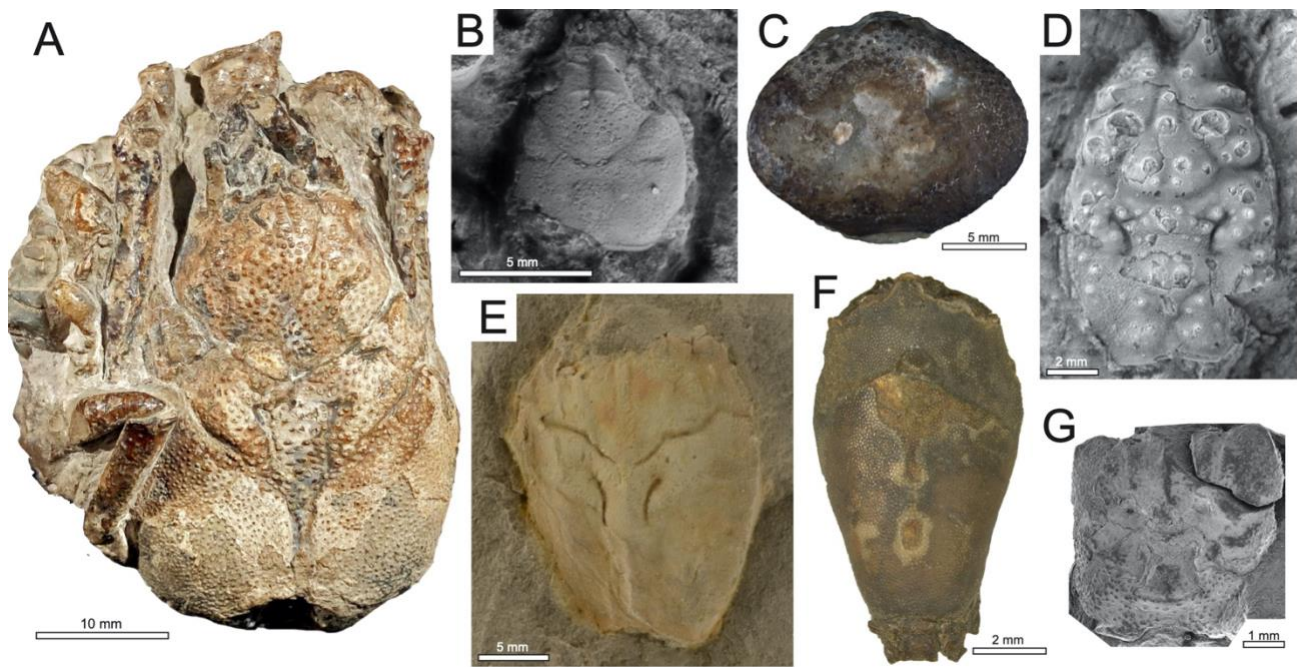

**Figure 2.** Meiura: **A:** *Eocarcinus praecursor* [Withers, 1932](#), holotype NHM 18425, Lower Jurassic (Pliensbachian), UK. **B:** Anomura: **B:** *Vibrissalana jurassica* [Robins and Klompmaker, 2019](#), holotype NHMW 2007z0149/0405, Upper Jurassic (Tithonian), Austria. **C–G:** Brachyura: **C:** Dromioidea: Dromioidea: *Graptocarcinus muiri* [Stenzel, 1944](#), holotype BEG21288, Lower Cretaceous (Albian), San Luis Potosí, Mexico; **D:** Homoloida: Homoloida: Homolidae: *Doerfleria ornata* [Feldmann and Schweitzer, 2009](#), holotype Coll. No. 210, uppermost Lower Cretaceous (upper Albian), Texas, USA; **E–F:** Raninoidea: **E:** Palaeocorystoidea: Palaeocorystidae: *Joeranina kerri* (Luque, Feldmann, Schweitzer, Jaramillo, and Cameron, [2012](#), as *Notopocorystes*), holotype IGM p881128, upper Lower Cretaceous (Aptian), Colombia; **F:** Raninoidea: Lyreididae: *Marylyreidus punctatus* ([Rathbun, 1935](#), as *Notopocorystes*), non-type specimen Coll. No. 210 Texas, USA; **G:** Cyclodorippoidea: Cyclodorippoidea: Cymonomidae: *Cymonomus primitivus* [Müller and Collins, 1991](#), holotype EK-10.1 [M.91-135], Eocene (Priabonian), Budapest, Hungary. Photos by: Javier Luque (A, E, and F), Adiel Klompmaker (B), Ann Molineux, courtesy of Lisa Boucher and Adiel Klompmaker (C), Rodney Feldmann (D), and Alfréd Dulai (G).



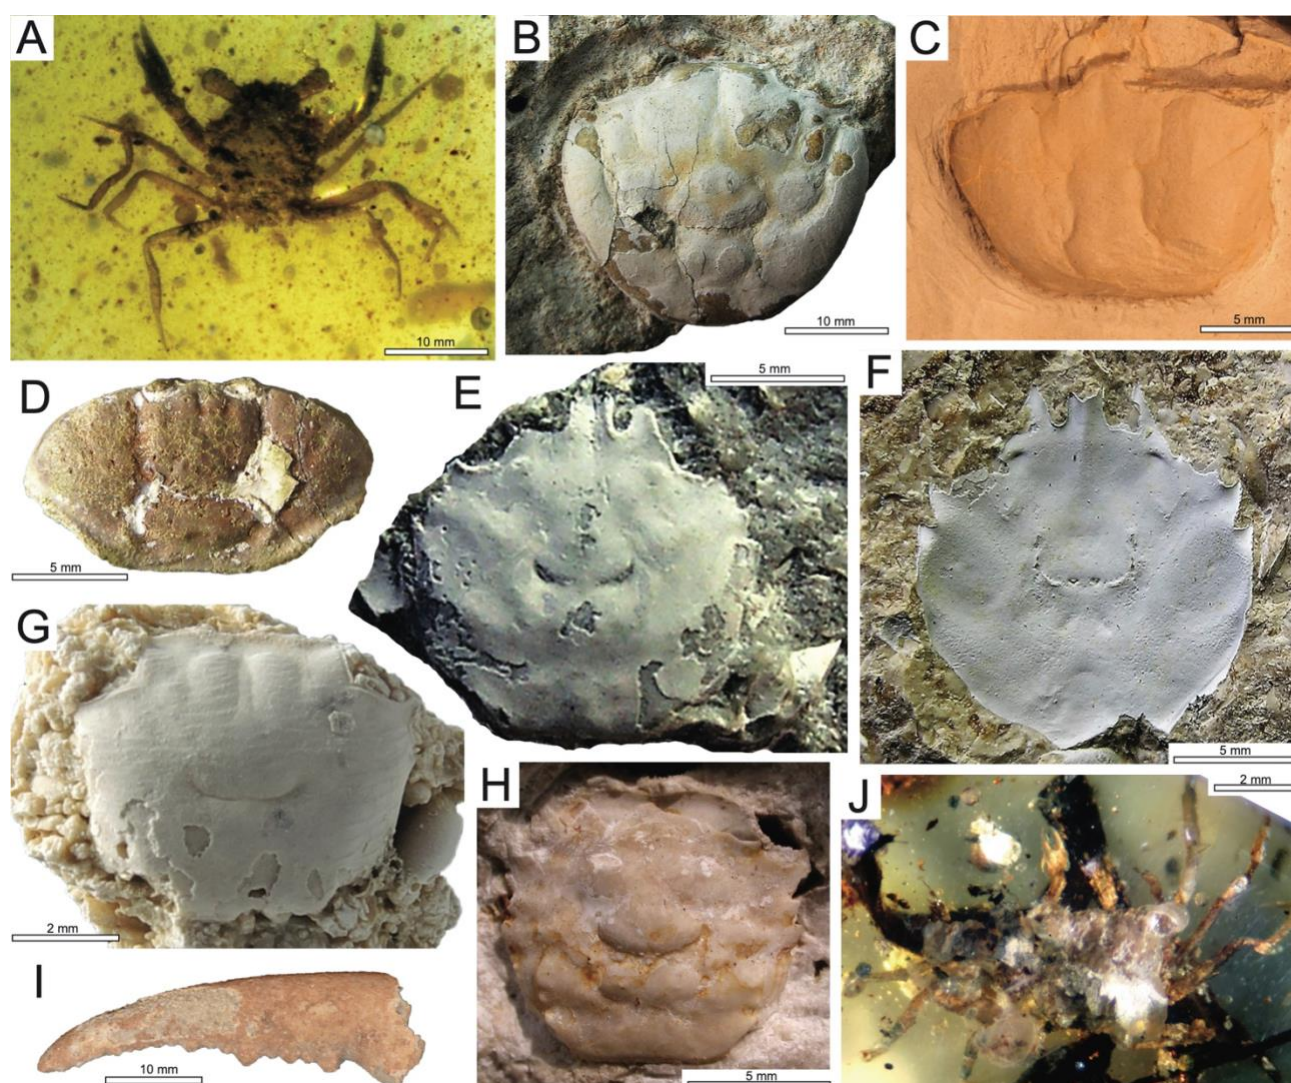

**Figure 3.** Crown Eubrachyura. **A:** Superfamily uncertain: Cretapsaridae: *Cretapsara athanata* Luque in [Luque et al., 2021](#), holotype LYAM-9, lowermost Upper Cretaceous (lower Cenomanian), Burma. **B:** Potamoidea: Potamidae: *Alontecarcinus buratoi* [De Angeli and Caporiondo, 2019](#), holotype IGVR 19.38, Eocene (Bartonian), Vicenza, Italy. **C–J:** Eubrachyura: Thoracotremana; **C:** Ocypodoidea: Ocypodidae: *Afruca miocenica* ([Artal, 2008](#), as *Uca*), holotype MGSB 68653, Miocene (Langhian), Catalonia, NE Iberian Peninsula. **D:** Pinnotheroidea: Pinnotheridae: *Pinnixa* sp., specimen UF 115397, lower Miocene (Burdigalian), Panama Canal, Panama ([Luque et al., 2017](#)). **E–J:** Grapsoidea; **E,F:** Percnidae; **E:** *Percnon santurbanensis* [Ceccon and De Angeli, 2019](#), holotype MCV.19/02, lower Oligocene (Rupelian), Vicenza, Italy; **F:** *Percnon paleogenicus* [De Angeli, 2023](#), holotype MCV.23/738-22.341, upper Eocene (Priabonian) Vicenza, Italy. **G:** Grapsidae: *Pachygrapsus hungaricus* [Müller, 1974](#), holotype HNHM 2004.163.1, middle Miocene (Badenian), Budapest area, Hungary. **H:** Varunidae: *Brachynotus corallinus* Beschin, Busulini, De Angeli & Tessier, [2007](#), holotype MCZ 1794, lower Eocene (Ypresian), Vicenza, Italy. **I:** Gecarcinidae: *Cardisoma guanhumi* Latreille, in Latreille, Le Peletier, Serville and Guérin, 1828, specimen XXXX, Pleistocene, XXXXX. **J:** Sesarnidae indet., specimen IHNFG-4991, lower Miocene (Aquitian) of Chiapas, Mexico ([Serrano-Sánchez et al., 2016](#)). Photos by: Lida Xing (A), Antonio de Angeli (B, E, F), Pedro Artal (C), Javier Luque (D, I), Matus Hyzny (G), Alessandra Busulini (H), and Francisco Vega (J).



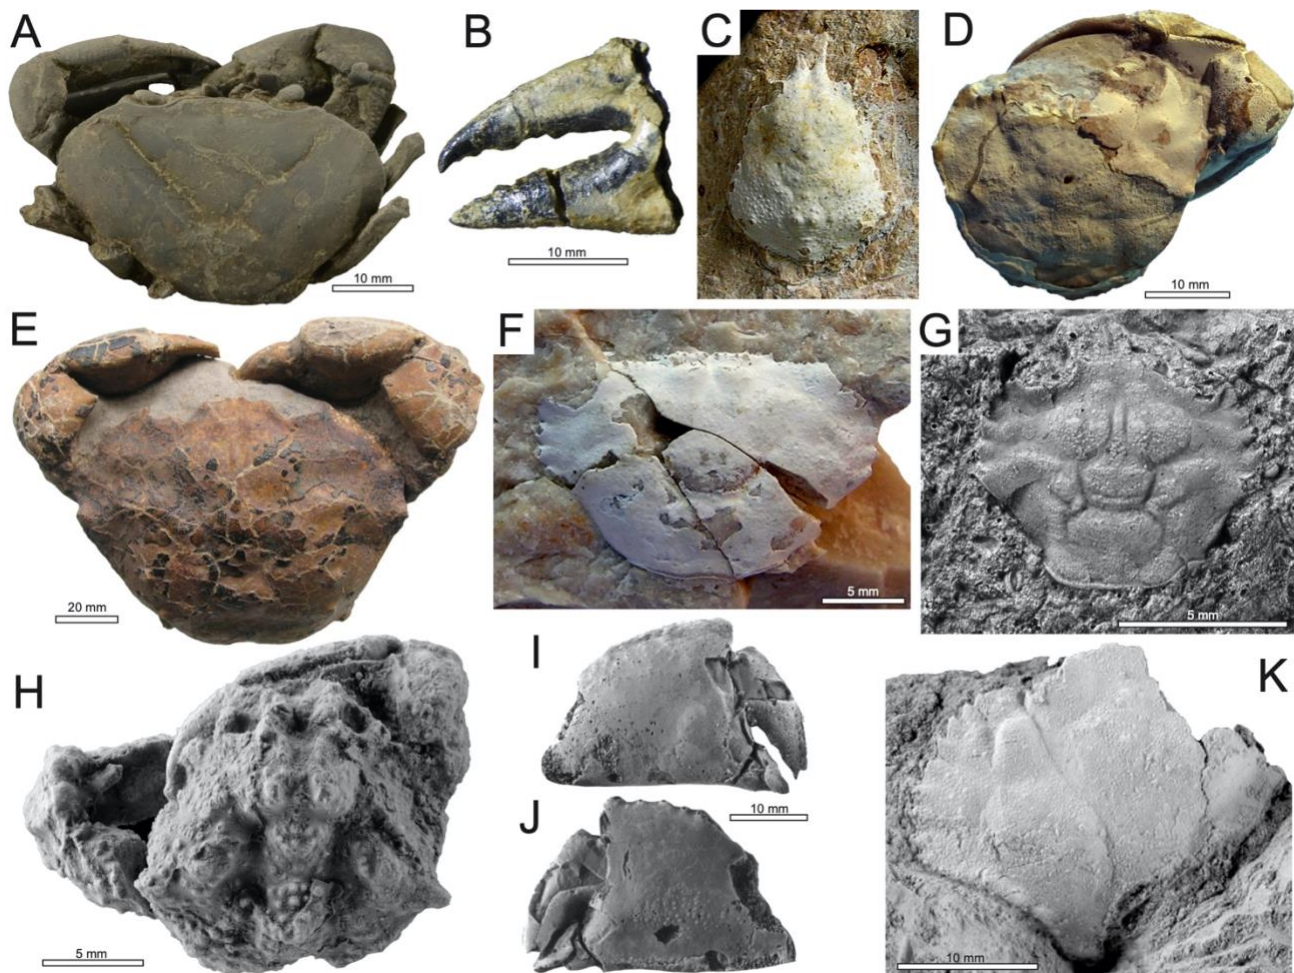

**Figure 4.** Crown Eubrachyura, cont. **A:** Pseudothelphusioidea: Pseudothelphusidae indet., specimen XXXX, Early Miocene (Burdigalian), Panama Canal, Panama ([Luque et al., 2019a](#)). **B:** Trichodactyloidea: Trichodactylidae indet., specimen CTA 47, Eocene (Barrancan), Contamana, Peru. **C:** Majoidea: Epialtidae + Mithracidae: *Micippa antiqua* Beschin, De Angeli, and Checchi, 2001, holotype I.G. 286477, lower Oligocene (Rupelian), Vicenza, Italy. **D–G:** Portunoidea; **D:** Eogeryonidae: *Eogeryon elegius* Ossó, 2021, holotype MGB 69151, lower Upper Cretaceous (Cenomanian), Northern Guadalajara Province, Spain ([Ossó, 2016](#)); **E:** Geryonidae: *Chaceon helmstedtense* ([Bachmayer and Mundlos, 1968](#)) (as *Coeloma?*), holotype Holotype 1968/773/2, lower Oligocene (Rupelian), Northwestern Germany; **F:** Portunidae: Thalamitinae: *Lessinithalamita gioiae* [De Angeli and Ceccon, 2015](#), holotype MCV14/15, lower Eocene (Ypresian), Vicenza, Italy; **G:** Polybiidae: *Liocarcinus heintzi* [Schweitzer and Feldmann, 2010b](#), holotype MNHN R03778, lower Oligocene (Rupelian), Western Aquitaine, France. **H:** Parthenopoidea: Parthenopidae + Dairoididae: *Aragolambrus collinsi* Ferratges, Zamora, and Aurell, 2019, holotype MPZ-2019/211, lower Eocene (Ypresian–Ilerdian), Huesca province, Spain. **I:** Calappoidea: Calappidae: *Calappa zinsmeisteri* [Feldmann and Wilson, 1988](#), holotype USNM 404877, upper Eocene, Seymour Island, Antarctica. **J:** Cancroidea: Cancridae: *Anatolikos undecimspinosus* Schweitzer, Feldmann, González-Barba, and Čosović, 2006, holotype MHN-UABCS/Ba12-9, middle Eocene, Baja California Sur, Mexico. Photos by: Javier Luque (A), Pierre Olivier Antoine (B), Antonio De Angeli (C and F), Àlex Ossó (D), Barry van Bakel (E), Rodney Feldmann (G, I–K), and Fernando Ferratges (H).



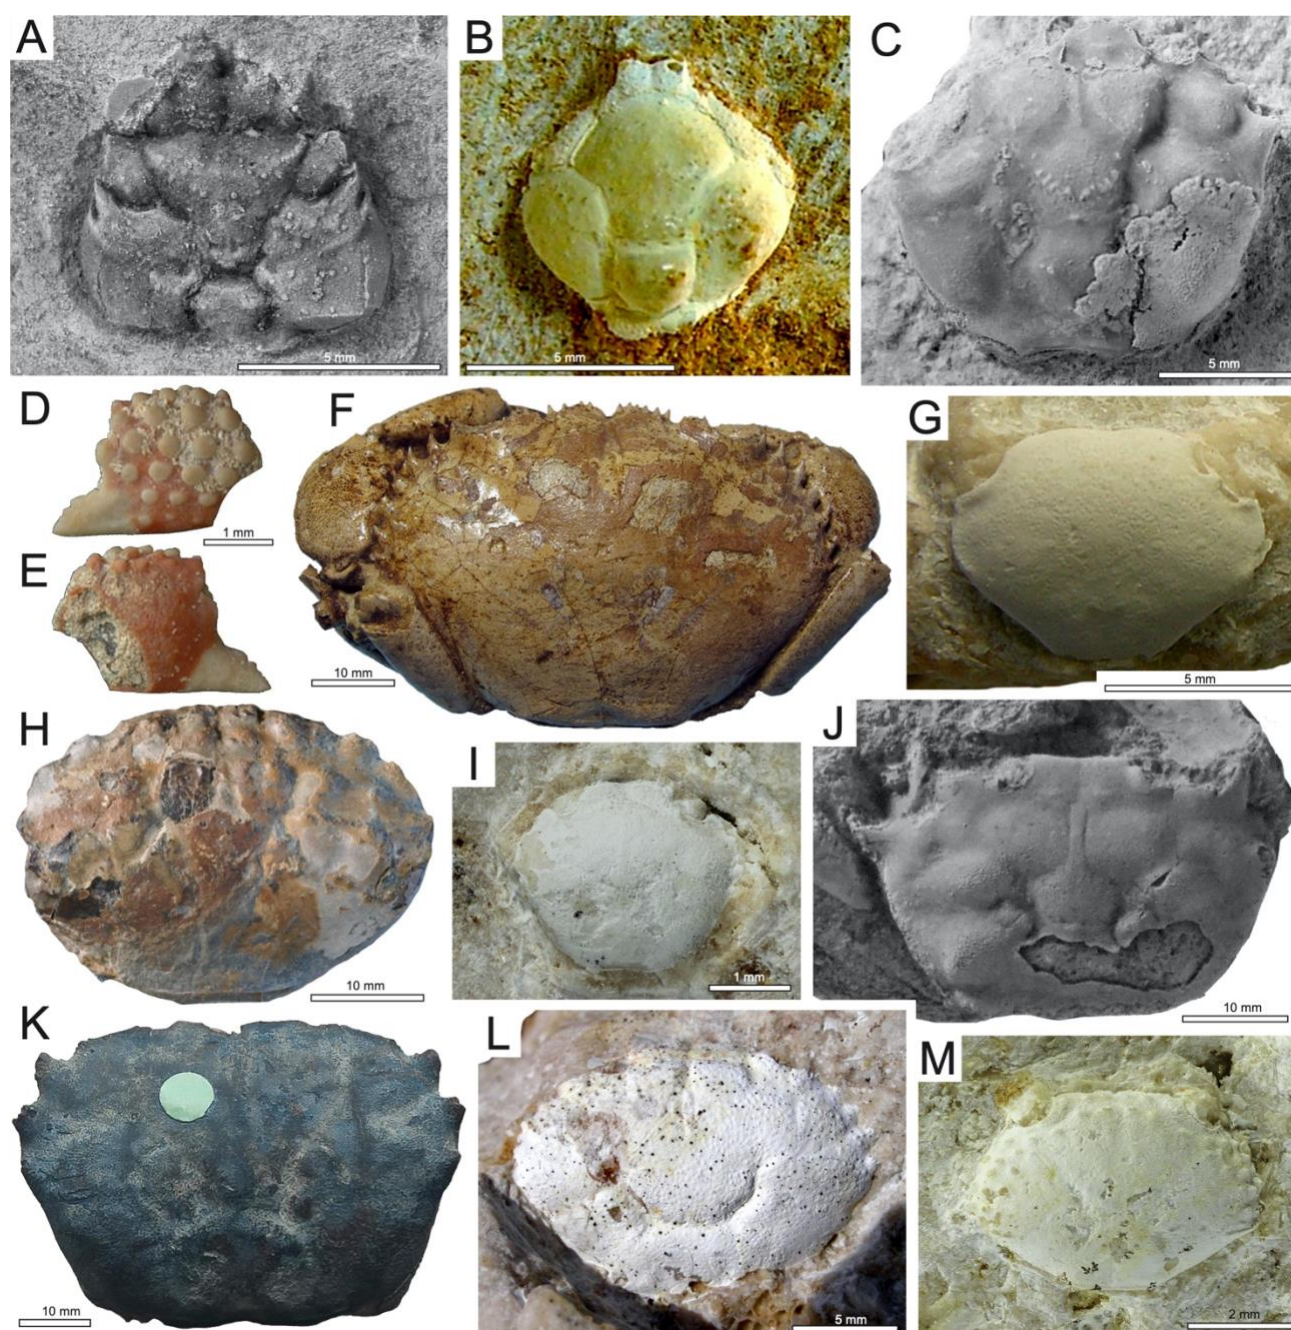

**Figure 5.** Crown Eubrachyura, cont. **A:** Dorippoidea: *Bartethusa hepatica* [Quayle and Collins, 1981](#), holotype BM In.61704, middle Eocene (Bartonian), Isle of Wight, England. **B:** Leucosioidea: Leucosiidae: *Typilobus alponensis* Beschin, De Angeli, and Zorzin, [2009](#), holotype IGVR78539, lower Eocene (Ypresian), Verona, Italy. **C:** Goneplacoidea: Euryplacidae: *Chirinocarcinus wichmanni* (Feldmann, Casadío, Chirino-Galvez, and Aguirre-Urreta, [1995](#)) (as *Glyphithyreus*), holotype GHUNLPam 7015, lowermost Paleocene (lower Danian), Neuquén Province, Argentina. **D–F:** Eriphioidea; **D–E:** Eriphiidae: *Eriphia verrucosa* ([Forskal, 1775](#)) (as *Cancer*), in [Betancort et al. \(2014\)](#), specimen number indet., upper Miocene, Islas Canarias, Spain. **F:** *Eriphia cocchi* Ristori, 1886, specimen C-021-2.1, lower Pliocene (Zanclean–Piacentian), Italy. **G:** Trapezioidea: Trapeziidae: *Archaeotetra lessinea* [De Angeli and Ceccon, 2013](#), holotype MCV 12/05-I.G.360311, lower Eocene (Ypresian), Monte Magré, Lessini Mountains, Italy. **H:** Eriphioidea: Oziidae: *Ozius collinsi* [Karasawa, 1992](#), holotype MFM39001, lowermost Middle Miocene, Okayama Prefecture, Japan, Japan. **I:** Pilumnoidea: Pilumnidae: *Glabropilumnus trispinosus* Beschin, Busulini, and Tessier, in [Beschinn et al., 2016a](#), holotype VR 94508, lower Eocene (Ypresian), Verona, Italy. **J:** Goneplacoidea: Goneplacidae: *Carcinoplax temikoensis* [Feldmann and Maxwell, 1990](#), holotype AR 1943, upper Eocene (Kaiatan or Runangan),

Westland, New Zealand. **K:** Xanthoidea: Pseudorhombilidae: *Pseudorhombila patagonica* [Glaessner, 1933](#), holotype In. 28031, Miocene indet., Santa Cruz Province, Argentina. **L:** Xanthoidea: Panopeidae: *Panopeus incisus* Beschin, Busulini, De Angeli, and Tessier, [2007](#), holotype MCZ 2009, lower Eocene, Vicenza, Italy. **M:** Xanthoidea: Xanthidae: *Phlyctenodes edwardsi* Beschin, Busulini, Tessier, and Zorzin, [2016a](#), holotype VR 94284, lower Eocene (Ypresian), Verona, Italy. Photos by: Richard Howard (A, K), Antonio De Angeli (B, G), Rodney Feldmann (C, J), Juan Francisco Betancort (D, E), Àlex Ossó (F), Hiroaki Karasawa (H), Alessandra Busulini (I, L, M).

## TABLE CAPTIONS

**Table 1.** Summary list of 40 fossil meirans and 36 vetted fossils for molecular divergence time estimations of brachyuran crabs (one anomuran outgroup, 35 brachyuran ingroups). Ages in millions of years (Ma).
